# Supplementary material
Source: PubMed Central journal article supplement (PMC6583063)
Supplement: jamaneurol-76-774-s001.pdf [file jamaneurol-76-774-s001.pdf]

## Supplementary Online Content

Tillman H, Johnston SC, Farrant M, et al. Risk for major hemorrhages in patients receiving clopidogrel and aspirin compared with aspirin alone after transient ischemic attack or minor ischemic stroke: a secondary analysis of the POINT randomized clinical trial. *JAMA Neurol*. Published online April 29, 2019. doi:10.1001/jamaneurol.2019.0932

**eTable 1.** POINT, ISTH and P<sub>RO</sub>FESS Hemorrhage Classifications

**eTable 2.** Baseline Characteristics for ITT Study Population by Major Hemorrhage Status

**eTable 3.** Major and Minor Hemorrhages for ITT Study Population

**eTable 4.** Baseline Characteristics of Patients with Major Hemorrhages in the ITT Study Population by Treatment Group

**eTable 5:** Baseline Characteristics of Patients with Major Hemorrhages in the As-Treated Study Population by Treatment Group

**eTable 6:** Bleeding Details for Minor Hemorrhages for the As-Treated Study Population

**eFigure.** Kaplan Meier Curve of Major and Minor Hemorrhage in the As Treated Study Population

**eAppendix.** POINT Investigators

This supplementary material has been provided by the authors to give readers additional information about their work.

**eTable 1: POINT, ISTH and PRoFESS Hemorrhage Classifications**

| <b>POINT</b>                                                                                                                                                                                                                                                                                                                                                                                                                                                                                                                                                                                                                                                                                                                                                                                                    | <b>ISTH</b>                                                                                                                                                                                                                                                                                                                                                                                                                                                                                                                                                                                                                                                                                                                                                                                                                                                                                                                                                                                                                                                                                                                                                  | <b>PRoFESS</b>                                                                                                                                                                                                                                                                                                                                                                                                                                                                                                                                                                                                                                                                                                                                                                                                       |
|-----------------------------------------------------------------------------------------------------------------------------------------------------------------------------------------------------------------------------------------------------------------------------------------------------------------------------------------------------------------------------------------------------------------------------------------------------------------------------------------------------------------------------------------------------------------------------------------------------------------------------------------------------------------------------------------------------------------------------------------------------------------------------------------------------------------|--------------------------------------------------------------------------------------------------------------------------------------------------------------------------------------------------------------------------------------------------------------------------------------------------------------------------------------------------------------------------------------------------------------------------------------------------------------------------------------------------------------------------------------------------------------------------------------------------------------------------------------------------------------------------------------------------------------------------------------------------------------------------------------------------------------------------------------------------------------------------------------------------------------------------------------------------------------------------------------------------------------------------------------------------------------------------------------------------------------------------------------------------------------|----------------------------------------------------------------------------------------------------------------------------------------------------------------------------------------------------------------------------------------------------------------------------------------------------------------------------------------------------------------------------------------------------------------------------------------------------------------------------------------------------------------------------------------------------------------------------------------------------------------------------------------------------------------------------------------------------------------------------------------------------------------------------------------------------------------------|
| <p><b>Major Hemorrhage</b></p> <p>Hemorrhage that results in non-traumatic, symptomatic intracranial hemorrhage (intracerebral, subdural, subarachnoid, intraventricular, symptomatic hemorrhagic transformation of an ischemic stroke), intraocular bleeding causing loss of vision, need for transfusion of two or more units of red cells or equivalent amount of whole blood, need for hospitalization/prolongation of an existing hospitalization, or death.</p> <p>May include bleeding events related to surgical procedures.</p> <p><b>Minor Hemorrhage</b></p> <p>Hemorrhage that results in interruption or discontinuation of study drug but not classifiable as major hemorrhagic event; may include bleeding events related to surgical procedures but not those related to accidental trauma.</p> | <p><b>Major Bleeding in Non-Surgical Patients</b></p> <p>Fatal bleeding, <i>and/or</i></p> <p>Symptomatic bleeding in a critical area or organ, such as intracranial, intraspinal, intraocular, retroperitoneal, intraarticular or pericardial, or intramuscular with compartment syndrome, <i>and/or</i></p> <p>Bleeding causing a fall in hemoglobin level of 2 g/dL (1.24 mmol/L) or more, or leading to transfusion of two or more units of whole blood or red cells.</p> <p><b>Minor Bleeding</b></p> <p>All non-major bleeds considered minor bleeds; further divided into those that are clinically relevant and those that are not.</p> <p><b>Clinically Relevant Minor Bleed<sup>a</sup></b></p> <p>An acute or subacute clinically overt bleed that does not meet criteria for a major bleed but prompts a clinical response, in that it leads to at least one of the following:</p> <ul style="list-style-type: none"> <li>• hospital admission for bleeding</li> <li>• physician-guided medical or surgical treatment for bleeding</li> <li>• change in antithrombotic therapy (including interruption/discontinuation of study drug)</li> </ul> | <p><b>Major Hemorrhage</b></p> <p>Hemorrhage that results in clinically significant disability, symptomatic intracranial hemorrhage, intraocular bleeding causing loss of vision, need for a transfusion of 2 or more units of red cells or equivalent amount of whole blood, or need for hospitalization.</p> <p><b>Life-threatening Hemorrhage</b></p> <p>Hemorrhage that was fatal or required use of intravenous inotropic medication to maintain blood pressure, surgical intervention, or transfusion of 4 or more units of red cells or equivalent amount of whole blood.</p> <p><b>Non-life-threatening Hemorrhage</b></p> <p>Hemorrhage classified as major hemorrhage but not as life-threatening.</p> <p><b>Minor Hemorrhage</b></p> <p>All non-major hemorrhages leading to interruption of therapy.</p> |

Abbreviation: POINT, Platelet-Oriented Inhibition in New TIA and minor ischemic stroke; ISTH, International Society on Thrombosis and Hemostasis; PRoFESS, Prevention Regimen for Effectively Avoiding Second Strokes; g/dL, grams per deciliter; mmol/L, millimoles per liter.

<sup>a</sup> Communication from the Scientific and Standardization Committee (SSC) of the International Society on Thrombosis and Hemostasis (ISTH), November 2015.

---

**eTable 2: Baseline Characteristics for ITT Study Population by Major Hemorrhage Status**

| Characteristic                                                 | N  | Major Hemorrhage (N=33) | N    | No Major Hemorrhage (N=4848) | p-value       |
|----------------------------------------------------------------|----|-------------------------|------|------------------------------|---------------|
| Age (yr) – median (IQR)                                        | 33 | 74.0 (60.0-84.0)        | 4848 | 65.0 (55.0-74.0)             | <b>0.0043</b> |
| Female sex – no. (%)                                           | 33 | 17 (51.5%)              | 4848 | 2178 (44.9%)                 | 0.4482        |
| Race – no. (%)                                                 | 32 |                         | 4706 |                              | 0.2533        |
| White                                                          |    | 22 (68.8%)              |      | 3533 (75.1%)                 |               |
| Black                                                          |    | 7 (21.9%)               |      | 959 (20.4%)                  |               |
| Asian                                                          |    | 2 (6.3%)                |      | 142 (3.0%)                   |               |
| Other                                                          |    | 1 (3.1%)                |      | 72 (1.5%)                    |               |
| Ethnicity – no. (%)                                            | 32 |                         | 4616 |                              | 0.4486        |
| Not US Hispanic                                                |    | 29 (90.6%)              |      | 4329 (93.8%)                 |               |
| US Hispanic                                                    |    | 3 (9.4%)                |      | 287 (6.2%)                   |               |
| Region – no. (%)                                               | 33 |                         | 4848 |                              | 1.0           |
| United States                                                  |    | 28 (84.9%)              |      | 4015 (82.8%)                 |               |
| Outside United States                                          |    | 5 (15.2%)               |      | 833 (17.2%)                  |               |
| Systolic blood pressure – median (IQR)                         | 33 | 160.0 (138.0-173.0)     | 4844 | 159.0 (143.0-180.0)          | 0.6884        |
| Diastolic blood pressure – median (IQR)                        | 33 | 83.0 (70.0-91.0)        | 4844 | 87.0 (77.0-98.0)             | 0.0924        |
| Medical history – no. (%)                                      |    |                         |      |                              |               |
| Congestive heart failure                                       | 33 | 0 (0.0%)                | 4841 | 126 (2.6%)                   | 1.0           |
| Atrial fibrillation                                            | 33 | 1 (3.0%)                | 4834 | 48 (1.0%)                    | 0.2847        |
| Ischemic heart disease                                         | 33 | 4 (12.1%)               | 4836 | 493 (10.2%)                  | 0.7698        |
| Hypertension                                                   | 32 | 27 (84.4%)              | 4828 | 3346 (69.3%)                 | 0.0818        |
| Diabetes mellitus                                              | 33 | 9 (27.3%)               | 4839 | 1331 (27.5%)                 | 0.9762        |
| Current tobacco smoker – no. (%)                               | 33 | 8 (24.2%)               | 4844 | 996 (20.6%)                  | 0.6022        |
| Taking aspirin at presentation – no. (%)                       | 33 | 20 (60.6%)              | 4848 | 2794 (57.6%)                 | 0.7304        |
| Taking clopidogrel at presentation – no. (%)                   | 33 | 1 (3.0%)                | 4847 | 89 (1.8%)                    | 0.4601        |
| Time to randomization (h) – mean (SD)                          | 33 | 7.0 (3.1)               | 4847 | 7.3 (2.9)                    | 0.5108        |
| Time to randomization – no. (%)                                | 33 |                         | 4847 |                              | 0.8685        |
| < 6h                                                           |    | 10 (30.3%)              |      | 1534 (31.7%)                 |               |
| ≥ 6h                                                           |    | 23 (69.7%)              |      | 3313 (68.4%)                 |               |
| Qualifying event – no. (%)                                     | 33 |                         | 4848 |                              | 0.3325        |
| TIA                                                            |    | 17 (51.5%)              |      | 2091 (43.1%)                 |               |
| Ischemic stroke                                                |    | 16 (48.5%)              |      | 2757 (56.9%)                 |               |
| Qualifying TIA baseline ABCD <sup>2</sup> score – median (IQR) | 17 | 5.0 (4.0-6.0)           | 2087 | 5.0(4.0-6.0)                 | 0.6018        |
| Qualifying ischemic stroke baseline NIHSS score – median (IQR) | 16 | 2.0 (1.0-3.0)           | 2734 | 2.0 (1.0-2.0)                | 0.5120        |

Differences in baseline characteristics between the treatment groups were not significant with the exception of age,  $p=0.0043$ . Race is missing/unknown for  $N=143$ ; ethnicity is missing/unknown for  $N=233$ . ABCD<sup>2</sup> scale score is given only for TIA group ( $N=2108$  with 4 missing) and NIHSS score given only for ischemic stroke group ( $N=2773$  with 23 missing).

Abbreviation: IQR, interquartile range; US, United States; SD, standard deviation; TIA, transient ischemic attack; ABCD<sup>2</sup>, age/blood pressure/clinical features/duration of symptoms/diabetes; NIHSS, National Institutes of Health Stroke Scale.

---

**eTable 3: Major and Minor Hemorrhages for ITT Study Population**

| Outcome                                                     | Clopidogrel plus aspirin (N=2432) |     | Aspirin (N=2449)    |     | Hazard Ratio (95% CI) | P Value |
|-------------------------------------------------------------|-----------------------------------|-----|---------------------|-----|-----------------------|---------|
|                                                             | Patients with Event               |     | Patients with Event |     |                       |         |
|                                                             | no.                               | %   | no.                 | %   |                       |         |
| <b>Fatal Major Hemorrhage<sup>a</sup></b>                   | 3                                 | 0.1 | 2                   | 0.1 |                       |         |
| <b>Major Hemorrhage</b>                                     | 23                                | 0.9 | 10                  | 0.4 | 2.32<br>(1.10 – 4.87) | 0.02    |
| <u>Intracranial hemorrhage</u>                              | 6                                 | 0.2 | 3                   | 0.1 |                       |         |
| Hemorrhagic stroke                                          | 5                                 | 0.2 | 3                   | 0.1 |                       |         |
| Symptomatic intracerebral hemorrhage                        | 2                                 | 0.1 | 2                   | 0.1 |                       |         |
| Symptomatic hemorrhagic transformation of cerebral infarcts | 2                                 | 0.1 | 1                   | 0.0 |                       |         |
| Other symptomatic intracranial hemorrhage (subarachnoid)    | 2                                 | 0.1 | 0                   | 0   |                       |         |
| <u>Other than intracranial hemorrhage<sup>b</sup></u>       | 17                                | 0.7 | 7                   | 0.3 |                       |         |
| Upper GI hemorrhage                                         | 4                                 | 0.2 | 4                   | 0.2 |                       |         |
| Lower GI hemorrhage                                         | 7                                 | 0.3 | 1                   | 0   |                       |         |
| Hematuria                                                   | 1                                 | 0.0 | 1                   | 0.0 |                       |         |
| Other <sup>c</sup>                                          | 5                                 | 0.2 | 1                   | 0.0 |                       |         |
| <b>Minor Hemorrhage</b>                                     | 40                                | 1.6 | 13                  | 0.5 | 3.12<br>(1.67 – 5.83) | <0.001  |

<sup>a</sup> The five fatal major hemorrhages consist of 2 symptomatic intracerebral hemorrhages, 2 symptomatic hemorrhagic transformations, and 1 groin hemorrhage with cardiac arrest.

<sup>b</sup> Three of these patients had 2 hemorrhagic events each.

<sup>c</sup> Other consists of 1 uterine fibroids, 1 vitreous hemorrhage, 1 implantation of a loop recorder, 1 gallbladder hematoma, and 1 groin hemorrhage with cardiac arrest. One patient had a traumatic arm hemorrhage due to a fall adjudicated as a major hemorrhage; according to the protocol, this should not have qualified as a major hemorrhage since it was due to accidental trauma.

Abbreviation: GI, gastrointestinal.

**eTable 4. Baseline Characteristics of Patients with Major Hemorrhages in the ITT Study Population by Treatment Group**

| Characteristic                                                 | N  | Clopidogrel plus Aspirin (N=23) | N  | Aspirin (N=10)      |
|----------------------------------------------------------------|----|---------------------------------|----|---------------------|
| Total events                                                   |    | 24                              |    | 12                  |
| Events on treatment                                            |    | 22                              |    | 7                   |
| Total patients                                                 |    | 23                              |    | 10                  |
| Patients on treatment                                          |    | 21                              |    | 6                   |
| Time to hemorrhage (days) – median (IQR)                       | 23 | 29.5 (2.6 – 51.8)               | 10 | 19.8 (6.5 – 46.8)   |
| Age (yr) – median (IQR)                                        | 23 | 74.0 (63.0-84.0)                | 10 | 68.0 (49.0-82.0)    |
| Female sex – no. (%)                                           | 23 | 12 (52.2%)                      |    | 5 (50.0%)           |
| Race - no. (%)                                                 | 22 |                                 | 10 |                     |
| White                                                          |    | 17 (77.3%)                      |    | 5 (50.0%)           |
| Black                                                          |    | 4 (18.2%)                       |    | 3 (30.0%)           |
| Asian                                                          |    | 1 (4.6%)                        |    | 1 (10.0%)           |
| Other                                                          |    | 0 (0.0%)                        |    | 1 (10.0%)           |
| Ethnicity - no. (%)                                            | 22 |                                 | 10 |                     |
| Not US Hispanic                                                |    | 19 (86.4%)                      |    | 10 (100.0%)         |
| US Hispanic                                                    |    | 3 (13.6%)                       |    | 0 (0.0%)            |
| Region – no. (%)                                               | 23 |                                 | 10 |                     |
| United States                                                  |    | 20 (87.0%)                      |    | 8 (80.0%)           |
| Outside United States                                          |    | 3 (13.0%)                       |    | 2 (20.0%)           |
| Systolic blood pressure – median (IQR)                         | 23 | 162.0 (140.0-173.0)             | 10 | 154.0 (138.0-181.0) |
| Diastolic blood pressure – median (IQR)                        | 23 | 73.0 (68.0-92.0)                | 10 | 88.0 (83.0-91.0)    |
| Medical history – no. (%)                                      |    |                                 |    |                     |
| Congestive heart failure                                       | 23 | 0 (0.0%)                        | 10 | 0 (0.0%)            |
| Atrial fibrillation                                            | 23 | 1 (4.4%)                        | 10 | 0 (0.0%)            |
| Ischemic heart disease                                         | 23 | 4 (17.4%)                       | 10 | 0 (0.0%)            |
| Hypertension                                                   | 22 | 20 (90.9%)                      | 10 | 7 (70.0%)           |
| Diabetes mellitus                                              | 23 | 6 (26.1%)                       | 10 | 3 (30.0%)           |
| Current tobacco smoker – no. (%)                               | 23 | 5 (21.7%)                       | 10 | 3 (30.0%)           |
| Taking aspirin at presentation – no. (%)                       | 23 | 14 (60.9%)                      | 10 | 6 (60.0%)           |
| Taking clopidogrel at presentation – no. (%)                   | 23 | 1 (4.4%)                        | 10 | 0 (0.0%)            |
| Time to randomization (h) – mean (SD)                          | 23 | 7.5 (3.4)                       | 10 | 8.1 (2.2)           |
| < 6h                                                           |    | 8 (34.8%)                       |    | 2 (20.0%)           |
| ≥ 6h                                                           |    | 15 (65.2%)                      |    | 8 (80.0%)           |
| Qualifying event – no. (%)                                     | 23 |                                 | 10 |                     |
| TIA                                                            |    | 12 (52.2%)                      |    | 5 (50.0%)           |
| Ischemic stroke                                                |    | 11 (47.8%)                      |    | 5 (50.0%)           |
| Qualifying TIA baseline ABCD <sup>2</sup> score – median (IQR) | 12 | 5.0 (4.5-6.0)                   | 5  | 5.0 (4.0-5.0)       |
| Qualifying ischemic stroke baseline NIHSS score – median (IQR) | 11 | 2.0 (0.0-3.0)                   | 5  | 2.0 (2.0-3.0)       |

Differences in baseline characteristics between treatment groups were not significant: smallest p-value was for diastolic blood pressure with a p-value of 0.1081. Race is missing/unknown for N=1. Ethnicity is missing/unknown for N=1. ABCD<sup>2</sup> scale score is given only for TIA group (N=17) and NIHSS only for ischemic stroke group (N=16).

Abbreviation: IQR, interquartile range; US, United States; SD, standard deviation; TIA, transient ischemic attack; ABCD<sup>2</sup>, age/blood pressure/clinical features/duration of symptoms/diabetes; NIHSS, National Institutes of Health Stroke Scale.

**eTable 5. Baseline Characteristics of Patients with Major Hemorrhages in the As-Treated Study Population by Treatment Group**

| Characteristic                                                 | N  | Clopidogrel plus Aspirin (N=21) | N | Aspirin (N=6)       |
|----------------------------------------------------------------|----|---------------------------------|---|---------------------|
| Total number of events                                         |    | 21                              |   | 6                   |
| Total patients                                                 |    | 21                              |   | 6                   |
| Time to hemorrhage (days) – median (IQR)                       | 21 | 21.2 (2.6 – 51.3)               | 6 | 11.5 (6.5 – 23.4)   |
| Age (yr) – median (IQR)                                        | 21 | 74.0 (67.0-84.0)                | 6 | 64.5 (46.0-82.0)    |
| Female sex – no. (%)                                           | 21 | 11 (52.4%)                      | 6 | 4 (66.7%)           |
| Race – no. (%)                                                 | 20 |                                 | 6 |                     |
| White                                                          |    | 16 (80.0%)                      |   | 3 (50.0%)           |
| Black                                                          |    | 3 (15.0%)                       |   | 2 (33.3%)           |
| Asian                                                          |    | 1 (5.0%)                        |   | 0 (0.0%)            |
| Other                                                          |    | 0 (0.0%)                        |   | 1 (16.7%)           |
| Ethnicity – no. (%)                                            | 20 |                                 | 6 |                     |
| Not US Hispanic                                                |    | 18 (90.0%)                      |   | 6 (100.0%)          |
| US Hispanic                                                    |    | 2 (10.0%)                       |   | 0 (0.0%)            |
| Region – no. (%)                                               | 21 |                                 | 6 |                     |
| United States                                                  |    | 18 (85.7%)                      |   | 5 (83.3%)           |
| Outside United States                                          |    | 3 (14.3%)                       |   | 1 (16.7%)           |
| Systolic blood pressure – median (IQR)                         | 21 | 162.0 (142.0-173.0)             | 6 | 175.0 (160.0-189.0) |
| Diastolic blood pressure – median (IQR)                        | 21 | 73.0 (68.0-92.0)                | 6 | 90.0 (87.0-104.0)   |
| Medical history – no. (%)                                      |    |                                 |   |                     |
| Congestive heart failure                                       | 21 | 0 (0.0%)                        | 6 | 0 (0.0%)            |
| Atrial fibrillation                                            | 21 | 1 (4.8%)                        | 6 | 0 (0.0%)            |
| Ischemic heart disease                                         | 21 | 3 (14.3%)                       | 6 | 0 (0.0%)            |
| Hypertension                                                   | 20 | 18 (90.0%)                      | 6 | 4 (66.7%)           |
| Diabetes mellitus                                              | 21 | 6 (28.6%)                       | 6 | 3 (33.3%)           |
| Current tobacco smoker – no. (%)                               | 21 | 5 (23.8%)                       | 6 | 1 (16.7%)           |
| Taking aspirin at presentation – no. (%)                       | 21 | 12 (57.1%)                      | 6 | 3 (50.0%)           |
| Taking clopidogrel at presentation – no. (%)                   | 21 | 1 (4.8%)                        | 6 | 0 (0.0%)            |
| Time to randomization (h) – mean (SD)                          | 21 | 7.5 (3.6)                       | 6 | 8.5 (1.4)           |
| Time to randomization – no. (%)                                | 21 |                                 | 6 |                     |
| < 6h                                                           |    | 8 (38.1%)                       |   | 0 (0.0%)            |
| > 6h                                                           |    | 13 (61.9%)                      |   | 6 (100.0%)          |
| Qualifying event – no. (%)                                     | 21 |                                 | 6 |                     |
| TIA                                                            |    | 11 (52.4%)                      |   | 4 (66.7%)           |
| Ischemic stroke                                                |    | 10 (47.6%)                      |   | 2 (33.3%)           |
| Qualifying TIA baseline ABCD <sup>2</sup> score – median (IQR) | 11 | 5.0 (5.0-6.0)                   | 4 | 5.0 (4.5-5.5)       |
| Qualifying ischemic stroke baseline NIHSS score –median (IQR)  | 10 | 2.0 (1.0-3.0)                   | 2 | 1.5 (1.0-2.0)       |



Differences in baseline characteristics between treatment groups were not significant at  $p \leq 0.1$  except for diastolic blood pressure with a p-value of 0.09. Race is missing/unknown for N=1. Ethnicity is missing/unknown for N=1. ABCD<sup>2</sup> scale score given only for TIA group (N=15); NIHSS score given only for ischemic stroke group (N=12).

Abbreviation: IQR, interquartile range; US, United States; SD, standard deviation; TIA, transient ischemic attack; ABCD<sup>2</sup>, age/blood pressure/clinical features/duration of symptoms/diabetes; NIHSS, National Institutes of Health Stroke Scale.

**eTable 6: Bleeding Details for Minor Hemorrhages for the As-Treated Study Population**

|                                            | <b>Clopidogrel<br/>plus aspirin<br/>(N=2398)</b> | <b>Aspirin<br/>(N=2421)</b> | <b>Total</b> |
|--------------------------------------------|--------------------------------------------------|-----------------------------|--------------|
| Asymptomatic intracerebral hemorrhage      | 1 (0.04%)                                        | 1 (0.04%)                   | 2            |
| Other asymptomatic intracranial hemorrhage | 3 (0.12%)                                        | 1 (0.04%)                   | 4            |
| Conjunctival hemorrhage                    | 0 (0.00%)                                        | 1 (0.04%)                   | 1            |
| Cutaneous                                  | 13 (0.54%)                                       | 1 (0.04%)                   | 14           |
| Epistaxis                                  | 3 (0.12%)                                        | 2 (0.08%)                   | 5            |
| Gastrointestinal                           | 12 (0.50%)                                       | 4 (0.17%)                   | 16           |
| Genitourinary                              | 3 (0.12%)                                        | 3 (0.13%)                   | 6            |
| Gum bleeding                               | 1 (0.04%)                                        | 0 (0.00%)                   | 1            |
| Oral                                       | 2 (0.08%)                                        | 0 (0.00%)                   | 2            |
| <b>Total</b>                               | <b>38</b>                                        | <b>13</b>                   | <b>51</b>    |

eFigure1. Kaplan Meier Curve of Major and Minor Hemorrhage in the As Treated Study Population

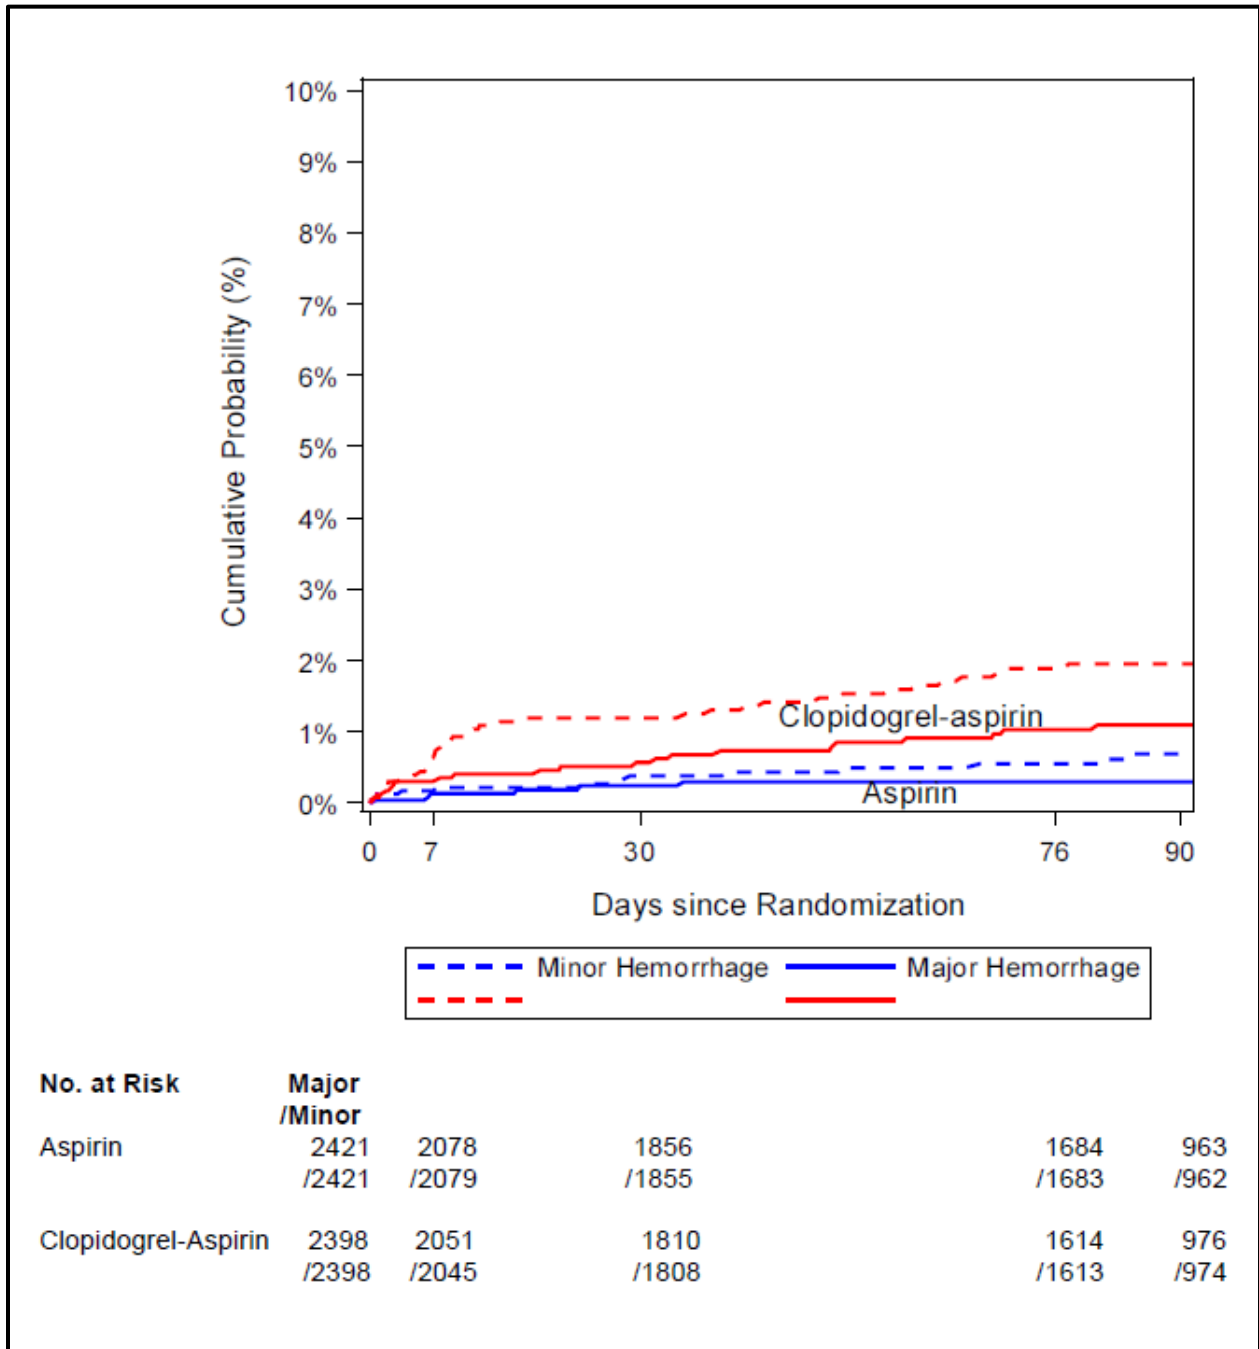

## **eAppendix. POINT Investigators**

### **EXECUTIVE COMMITTEE**

S. Claiborne Johnston, MD, PhD, J. Donald Easton, MD, Anthony S. Kim, MD, MAS, Mary Farrant, MBA, Yuko Palesch, PhD, Jordan Elm, PhD, William Barsan, MD, Anne Lindblad, PhD, Robin Conwit, MD, Scott Janis, PhD.

### **ADVISORY COMMITTEE**

S. Claiborne Johnston, MD, PhD, J. Donald Easton, MD, Anthony S. Kim, MD, MAS, Mary Farrant, MBA, Yuko Palesch, PhD, Jordan Elm, PhD, Holly Tillman, MS, Catherine Dillon, MS, William Barsan, MD, Renee Kasperek-Wynn, RN, BSN, Valerie Stevenson, BAS, RRT, CCRP, Lewis Morgenstern, MD, Anne Lindblad, PhD, Carolyn Burke, Lahna Jones, Kimberly Vogan, Robin Conwit, MD, Scott Janis, PhD.

### **DATA AND SAFETY MONITORING BOARD**

Gregory J. del Zoppo, MD, Robert Cite, MD, Misha Eliasziw, PhD, Pierre Fayad, MD, FAHA, FAAN, Ann M. Lowe, MD, Ileana L. Piña, MD, MPH, Julie A. Swain, MD.

### **CLINICAL EVENT ADJUDICATION COMMITTEE**

Eric Adelman, MD, Brian Scott, MD, David Bach, MD, Claire S. Duvernoy, MD, Kevin A. Kerber, MD, Deborah A. Levine, MD, MPH, Matthew T. Lorincz, MD, PhD. Darin B. Zahuranec, MD.

### **NATIONAL INSTITUTES OF HEALTH**

SCOTT JANIS, PHD, ROBIN CONWIT, MD.

### **NETT CLINICAL COORDINATING CENTER**

William Barsan, MD, Joy Black, BSN, RN, MS, Renee Kasperek-Wynn, RN, BSN, Robert Silbergleit, MD, Mickie Speers, BSN, Valerie Stevenson BAS, RRT, CCRP, Carol Van Huysen, BS, CCRP. Tess Bonham, BS, Andrace DeYampert, MSHS, CCRP, Shirley Frederikson, RN, MS, Samkeliso Mawocha, MS, CCRP, CCRA, Gina Neshewat, MPH, CCRP.

### **DATA COORDINATION UNIT/DEPARTMENT OF PUBLIC HEALTH SCIENCES (MUSC)**

JORDAN ELM, PHD, CATHERINE R. DILLON, MS, FARIA KHATTAK, MPH, YUKO PALESCH, PHD, KAVITA PATEL, BS, KEITH PAULS, BS, LOGAN SIRLINE, MPH, HOLLY TILLMAN, MS, WENLE ZHAO, PHD. CASSIDY CONNER, MS, ADAM HENRY, MPH, AARON PERLMUTTER, MPH, MSW.

### **POINT CLINICAL COORDINATING CENTER (UCSF)**

Mary Farrant, BSN, MBA, Karla Zurita, BS, CCRP. Trese Biagini, BA, MA, MSN, ANCC, Marcos T. Contreras, PharmD, Caitlin Glennon, BA.

### Clinical Research Collaboration (EMMES)

ANNE LINDBLAD, PHD, CAROLYN BURKE, KIMBERLY VOGAN, LAHNA JONES, SYDNEY AVVEDUTI, ELIZABETH HEBERT, CATHRYN LUTHER-LEMMON, REBECCA MORGAN; CAROLYN LUCE, SHARP CLINICAL SERVICES; SHELLEY MCKENNA, CULZEAN CONSULTING; MARIA ELENA LOZANO, SYNTERACT, INC.; SANDRA PETROLO, NEUROSCIENCE TRIALS AUSTRALIA.

### AUSTRALIA *Country Lead:* Christopher LEVI

| Site                 | Role                                    | Team Member                                                                                                                                                                                                              |
|----------------------|-----------------------------------------|--------------------------------------------------------------------------------------------------------------------------------------------------------------------------------------------------------------------------|
| Austin Hospital      | Principal Investigator                  | Vincent THIJS                                                                                                                                                                                                            |
|                      | Co-Investigator(s) Study Coordinator(s) | Amy BRODTMANN, Marion SIMPSON<br>Dennis YOUNG                                                                                                                                                                            |
|                      |                                         |                                                                                                                                                                                                                          |
| Box Hill Hospital    | Principal Investigator                  | Chris BLADIN                                                                                                                                                                                                             |
|                      | Co-Investigator(s) Study Coordinator(s) | Jill CAMERON, Philip CHOI, Skye COOTE, Helen DEWEY, Amanda GILLIGAN, Sarah LEE, Claire MULLER, Poh SIEN LOH, Gabrielle TSE, Wenwen ZHANG<br>Zofia ROSS, Grace THOMAS                                                     |
|                      |                                         |                                                                                                                                                                                                                          |
| Footscray Hospital   | Principal Investigator                  | Tissa WIJERATNE                                                                                                                                                                                                          |
|                      | Co-Investigator(s) Study Coordinator(s) | Jennifer GOFF, Elizabeth MACKKEY<br>Sherisse CELESTINO, Essie LOW                                                                                                                                                        |
|                      |                                         |                                                                                                                                                                                                                          |
| Gosford Hospital     | Principal Investigator                  | Bill O'BRIEN                                                                                                                                                                                                             |
|                      | Co-Investigator(s) Study Coordinator(s) | Patricia CARUANA, Denis CRIMMINS, James W. EVANS, Penelope GORDON, Yun HWANG, Tejas PATEL, Nathan PAVEY, Elizabeth REYNEKE, Alexis SELBY, Jonathan STURM, Scott WHYTE, Stephen WINTERS<br>Deborah ALCHIN, Susanne RHODES |
|                      |                                         |                                                                                                                                                                                                                          |
| John Hunter Hospital | Principal Investigators                 | Chris LEVI, Neil SPRATT                                                                                                                                                                                                  |
|                      | Co-Investigator(s)                      | Timothy ANG, Jelle DEMEESTERE, Carlos ESPERON, Venkatesh KRISHNAMURTHY, Chris LEVI, Andre LOISELLE, Fredi MITEFF, Mark PARSONS, Ronak PATEL                                                                              |

|                                |                                                                                |                                                                                                                                                                                                                                                                                                                 |
|--------------------------------|--------------------------------------------------------------------------------|-----------------------------------------------------------------------------------------------------------------------------------------------------------------------------------------------------------------------------------------------------------------------------------------------------------------|
|                                | Study<br>Coordinator(s)                                                        | Terri HAINES, Erin KERR, Gemma KITSOS                                                                                                                                                                                                                                                                           |
| Monash Medical<br>Centre       | Principal<br>Investigator<br>Co-Investigator(s)<br>Study<br>Coordinator(s)     | Thanh PHAN<br>Benjamin CLISSOLD, John LY, Henry MA<br>Kitty WONG, Dennis YOUNG                                                                                                                                                                                                                                  |
| Royal Adelaide<br>Hospital     | Principal<br>Investigator<br>Co-Investigator(s)<br>Study<br>Coordinator(s)     | Timothy KLEINIG<br>Edmund CHEONG, Craig KURUNAWAI<br>Jennifer CRANEFIELD                                                                                                                                                                                                                                        |
| Royal<br>Melbourne<br>Hospital | Principal<br>Investigator<br>Co-Investigator(s)<br><br>Study<br>Coordinator(s) | Stephen DAVIS<br>Bruce CAMPBELL, Arvind CHANDRATHEVA,<br>Thanuja DHARMADASA, Lauren GILES, Peter<br>HAND, Nevin JOHN, Matthew LEE, Nyan LYNN,<br>Andrew NEAL, Tom OXLEY, Darshan SHAH,<br>Hans Tsuang-Han TU, Vinojini VIVEK, Teddy WU,<br>Bernard YAN, Nawaf YASSI, Henry ZHAO<br>Amy MCDONALD, Gabriel SILVER |

## CANADA

*Country Lead:* Shelagh COUTTS

| Site                             | Role                                                                        | Team Member                                                                               |
|----------------------------------|-----------------------------------------------------------------------------|-------------------------------------------------------------------------------------------|
| Charles<br>LeMoyné<br>Hospital   | Principal<br>Investigator<br>Co-Investigator(s)<br>Study<br>Coordinator(s)  | Jean-Martin BOULANGER<br>Leo BERGER<br>Lise BLAIS                                         |
| Enfant-Jesus<br>Hospital         | Principal<br>Investigator<br>Co-Investigator(s)<br>Study<br>Coordinator(s)  | Steve VERREAULT<br>Marie-Christine CAMDEN, Ariane MACKEY<br>Karine COLLARD, Annette HACHE |
| Grey Nuns<br>Hospital            | Principal<br>Investigators<br>Co-Investigator(s)<br>Study<br>Coordinator(s) | Brian BUCK, Muzzaffar SIDDIQUI<br>Rajive JASSAL<br>Dana BERGQUIST, Lori PIQUETTE          |
| London Health<br>Sciences Center | Principal<br>Investigator                                                   | Richard CHAN                                                                              |

|                                          |                        |                                                                                                                                                                                                                                                                                                                                                                                                      |
|------------------------------------------|------------------------|------------------------------------------------------------------------------------------------------------------------------------------------------------------------------------------------------------------------------------------------------------------------------------------------------------------------------------------------------------------------------------------------------|
|                                          | Co-Investigator(s)     | Shahram ABOOTALEBI, Rasha ALSUBAIE, Reza AZARPAZHOOH, Ruba BAAMER, Sebastian FRIDMAN, Alexander KHAW, Jennifer MANDZIA, Antonia NUCERA, Iryna PALAMARCHUK, Patricia RICCIO, Luciano SPOSATO                                                                                                                                                                                                          |
|                                          | Study Coordinator(s)   | Beth BEAUCHAMP, Susan CRANN                                                                                                                                                                                                                                                                                                                                                                          |
| Montreal General Hospital                | Principal Investigator | Theodore WEIN                                                                                                                                                                                                                                                                                                                                                                                        |
|                                          | Co-Investigator(s)     | Eric EHRENSPERGER, Lucy VIEIRA                                                                                                                                                                                                                                                                                                                                                                       |
|                                          | Study Coordinator(s)   | Lisa WADUP                                                                                                                                                                                                                                                                                                                                                                                           |
| Notre-Dame Hospital                      | Principal Investigator | Celine ODIER                                                                                                                                                                                                                                                                                                                                                                                         |
|                                          | Co-Investigator(s)     | Nicole DANEAULT, Yan DESCHAINTE, Andre DUROCHER, Laura GIOIA, Gregory JACQUIN, Sylvain LANTHIER, Alexandre POPPE, Christian STAPF                                                                                                                                                                                                                                                                    |
|                                          | Study Coordinator(s)   | Marlene LAPIERRE                                                                                                                                                                                                                                                                                                                                                                                     |
| University of Alberta Hospital           | Principal Investigator | Ashfaq SHUAIB                                                                                                                                                                                                                                                                                                                                                                                        |
|                                          | Co-Investigator(s)     | Aftab AHMAD, Ghazala BASIR, Bashir BREBESH, Asif Javed BUTT, Shubhabrata DAS, Atlantic D'SOUZA, Bikram GAJUREL, Esseddeeg GHROODA, Dulara HUSSAIN, Hayrapet KALASHYA, Harsha KAMBLE JAYAPRAKASH, Mahesh KATE, Sahrish Aieshah KAZI, Herbert Alejandro MANOSALVA, Raj PARTHASARATHY, Sibi THIRUNAVUKARASU, Andrew WASSEF                                                                              |
|                                          | Study Coordinator(s)   | Brenda SCHWINDT                                                                                                                                                                                                                                                                                                                                                                                      |
| University of Calgary - Foothills Campus | Principal Investigator | Shelagh COUTTS                                                                                                                                                                                                                                                                                                                                                                                       |
|                                          | Co-Investigator(s)     | Abdulaziz AL SULTAN, Amjad ALSERAYA, Sarah BLAYNEY, Debabrata CHAKRABORTY, Shuo CHEN, Philip CHOI, Sadanand DEY, Veronique DUBUC, Prasanna ESWARADASS, James W. EVANS, Thalia FIELD, Brett GRAHAM, Janka HEGEDUS, Michael HILL, Oje IMOUKHUEDE, Evgenia KLOURFELD, Andrew LOCKEY, Aimen MOUSSADDY, Tapuwa MUSUKA, Nancy NEWCOMMON, Davar NIKNESHAN, Ramana REDDY, Dilip SINGH, Ravinder SINGH, Amith |

SITARAM, Ericka TELEG, Carol THAM, Anurag TRIVEDI, Stephen VAN GAAL, Amy YU, Charlotte ZERNA  
Supriya SAVE

|                            | Study Coordinator(s)                         |                                                                                                                                                                                                 |
|----------------------------|----------------------------------------------|-------------------------------------------------------------------------------------------------------------------------------------------------------------------------------------------------|
| Vancouver General Hospital | Principal Investigator<br>Co-Investigator(s) | Samuel YIP<br>Negar ASDAGHI, Oscar BENAVENTE, Thalia FIELD, Alejandra GOMEZ GONZALEZ, Asaf HONIG, Sharan MANN, Colleen MURPHY, Phillip TEAL, Stephen VAN GAAL, Laura WILSON<br>Genoveva MACLEAN |
|                            | Study Coordinator(s)                         |                                                                                                                                                                                                 |

## FINLAND

*Country Lead:* Risto ROINE

| Site                                 | Role                                         | Team Member                                                                                                                                                                                                                                                                                                                    |
|--------------------------------------|----------------------------------------------|--------------------------------------------------------------------------------------------------------------------------------------------------------------------------------------------------------------------------------------------------------------------------------------------------------------------------------|
| Helsinki University Central Hospital | Principal Investigator<br>Co-Investigator(s) | Turgut TATLISUMAK<br>Sami CURTZE, Reetta KIVIOJA, Maija KOIVU, Tea LARJO, Ivan MARINKOVIC, Nicolas MARTINEZ-MAJANDER, Emilia OSTERLUND-TAURIALA, Anastasia SHULGA, Gerli SIBOLT, Anna TAPANAINEN, Marjaana TIAINEN, Liisa TOMPPU, Outi TUMPULA, Sannakaisa VAINIKKA, Kati VALKONEN, Jyri VIRTA, Emil YLIKALLIO<br>Saija EIROLA |
|                                      | Study Coordinator(s)                         |                                                                                                                                                                                                                                                                                                                                |
| Turku University Hospital            | Principal Investigator<br>Co-Investigator(s) | Risto ROINE<br>Julia AIVO, Anna BRUCK, Lauri HURRI, Manu JOKELA, Jaana KORPELA, Susanna ROINE, Jori RUUSKANEN, Pauli YLIKOTILA<br>Jaana ERIKSSON                                                                                                                                                                               |
|                                      | Study Coordinator(s)                         |                                                                                                                                                                                                                                                                                                                                |

## FRANCE

*Country Lead:* Pierre AMARENCO

| Site                             | Role                                         | Team Member                                                                                                                  |
|----------------------------------|----------------------------------------------|------------------------------------------------------------------------------------------------------------------------------|
| Adolphe de Rothschild Foundation | Principal Investigator<br>Co-Investigator(s) | Michael OBADIA<br>Mathieu FISSELLIER, Laura GROSLIERE<br>Soukie JOUAVILLE, Elise PERRIOT, Alessandra PINCINI, Josephine TINE |
|                                  | Study Coordinator(s)                         |                                                                                                                              |



|                                   |                        |                                                                                                                                   |
|-----------------------------------|------------------------|-----------------------------------------------------------------------------------------------------------------------------------|
| Bichat-Claude<br>Bernard Hospital | Principal Investigator | Elena MESEGUER                                                                                                                    |
|                                   | Co-Investigator(s)     | Pierre AMARENCO, Lucie CABREJO, Céline GUIDOUX, Cristina HOBEANU, Philippa LAVALLEE, Anna MARTIN BECHET, Ricardo RIGUAL           |
|                                   | Study Coordinator(s)   | Estelle BEGON, Loubna DJEDIDI                                                                                                     |
| Fleyriat Hospital                 | Principal Investigator | Frederic PHILIPPEAU                                                                                                               |
|                                   | Co-Investigator(s)     | Angel-Christian OLARU, Taras SOSYAK                                                                                               |
| Foch Hospital                     | Principal Investigator | Bertrand LAPERGUE                                                                                                                 |
|                                   | Co-Investigator(s)     | Adrien WANG                                                                                                                       |
|                                   | Study Coordinator(s)   | Delphine LOPEZ                                                                                                                    |
| Pierre Wertheimer Hospital        | Principal Investigator | Norbert NIGHOGHOSSIAN                                                                                                             |
|                                   | Co-Investigator(s)     | Amandine BENOIT, Tae-Hee CHO, Laurent DEREKX, Laura MECHTOUFF, Elodie ONG                                                         |
|                                   | Study Coordinator(s)   | Marielle BUISSON                                                                                                                  |
| Pitie-Salpetriere Hospital        | Principal Investigator | Yves SAMSON                                                                                                                       |
|                                   | Co-Investigator(s)     | Flore BARONNET, Sophie CROZIER, Sandrine DELTOUR, Belen DIAZ FERNANDEZ, Raphael LE BOUC, Anne LEGER, Charlotte ROSSO, Marion YGER |
|                                   | Study Coordinator(s)   | Bachir AIDAOU, Christine PIRES                                                                                                    |

## GERMANY

*Country Lead:* Hans-Christoph DIENER

| Site                    | Role                   | Team Member                                                     |
|-------------------------|------------------------|-----------------------------------------------------------------|
| Central Bremen Hospital | Principal Investigator | Andreas KASTRUP                                                 |
|                         | Co-Investigator(s)     | Uwe BECKER, Freimuth BRUNNER, Janina GUENTNER, Andreas SCHROTER |
|                         | Study Coordinator(s)   | Halil MERDIVAN                                                  |
| Hannover Medical School | Principal Investigator | Karin WEISSENBORN                                               |

|                                   |                         |                                                                                                                                                                     |
|-----------------------------------|-------------------------|---------------------------------------------------------------------------------------------------------------------------------------------------------------------|
|                                   | Co-Investigator(s)      | Maria GABRIEL, Gerrit GROSSE, Ramona SCHUPPNER, Hans WORTHMANN                                                                                                      |
|                                   | Study Coordinator(s)    | Femke PLÜSCHKE, Karen SCHAEFFER, Frederike VON DER HAAR                                                                                                             |
| University Hospital Essen         | Principal Investigators | Hans-Christoph DIENER, Martin KOEHRMANN, Christian WEIMAR                                                                                                           |
|                                   | Co-Investigator(s)      | Hsin-Chieh CHEN, Benedikt FRANK, Karim HAJJAR                                                                                                                       |
|                                   | Study Coordinator(s)    | Melanie DIETZOLD                                                                                                                                                    |
| University Hospital Frankfurt     | Principal Investigator  | Waltraud PFEILSCHIFTER                                                                                                                                              |
|                                   | Co-Investigator(s)      | Ferdinand BOHMANN, Iris DIVE, Katharina FILIPSKI, Christian FOERCH, Roxane-Isabelle KESTNER, Matthias LORENZ, Jan Hendrik SCHAEFER, Alexander SEILER, Damla TAHTALI |
|                                   | Study Coordinator(s)    | Heike RAI (BRAUN)                                                                                                                                                   |
| University Hospital of Ulm        | Principal Investigator  | Katharina ALTHAUS                                                                                                                                                   |
|                                   | Co-Investigator(s)      | Susanne MUELLER, Hermann NEUGEBAUER, Sebastian STOESSERT, Sebastien STROH                                                                                           |
|                                   | Study Coordinator(s)    | Sabine RAUBOLD                                                                                                                                                      |
| University Medical Center Hamburg | Principal Investigator  | Gotz THOMALLA                                                                                                                                                       |
|                                   | Co-Investigator(s)      | Christoph BECK, Bastian CHENG, Amir GOLSARI, Julia HOPPE, Anna C KRUTZELMANN, Julian SCHROEDER, Dieke VOGET                                                         |
|                                   | Study Coordinator(s)    | Dagmar OTTO                                                                                                                                                         |

## MEXICO

*Country Lead:* Jorge VILLARREAL-CAREAGA

| Site                               | Role                   | Team Member                                              |
|------------------------------------|------------------------|----------------------------------------------------------|
| Neurosciences Clinical Trials S.C. | Principal Investigator | Elmer Guillermo LOPEZ MEZA                               |
|                                    | Co-Investigator(s)     | Karla Gabriela ALTAMIRANO BELTRAN, Claudia PEREZ CORONEL |
|                                    | Study Coordinator(s)   | Wendy LOPEZ MEZA                                         |

## NEW ZEALAND

*Country Lead:* Alan BARBER

| <b>Site</b>            | <b>Role</b>            | <b>Team Member</b>                                                             |
|------------------------|------------------------|--------------------------------------------------------------------------------|
| Auckland City Hospital | Principal Investigator | Alan BARBER                                                                    |
|                        | Co-Investigator(s)     | Neil ANDERSON, Mary BRENNAN, Nicole JENKINS, Justin KAO, Dominic TSE, Teddy WU |
|                        | Study Coordinator(s)   | Lily ZHAO                                                                      |
| <b>SPAIN</b>           | <i>Country Lead:</i>   | Carlos MOLINA                                                                  |

| <b>Site</b>                      | <b>Role</b>             | <b>Team Member</b>                                                                                                                                                                                                                                                    |
|----------------------------------|-------------------------|-----------------------------------------------------------------------------------------------------------------------------------------------------------------------------------------------------------------------------------------------------------------------|
| Santa Creu and Sant Pau Hospital | Principal Investigator  | Joan MARTI FABREGAS                                                                                                                                                                                                                                                   |
|                                  | Co-Investigator(s)      | Aida ALEJALDRE, Miriam ALMENDROTE MUNOZ, Ignacio ARACIL, Pol CAMPS RENOM, Raquel DELGADO-MEDEROS, Lavinia DINIA, Sebastian FIGUEROA, Daniel GUISTADO, Alejandro MARTINEZ DOMENO, Estrella MORENAS, Luis PRATS SANCHEZ, Manuel SIMON, Javier SOTOCA Rebeca MARIN BUENO |
|                                  | Study Coordinator(s)    |                                                                                                                                                                                                                                                                       |
| Basurto Hospital                 | Principal Investigator  | Maria del Mar FREIJO GUERRERO                                                                                                                                                                                                                                         |
|                                  | Co-Investigator(s)      | Borja AGUILERA, Laura AUZMENDI, Jose Maria FERNANDEZ, Maria del Carmen GIL ALZUETA, Sonia GONZALEZ, Juan Luis IDRO, Ana IKERNE, Ana Maria LORENZO GARCIA, Arancha SAINZ, Saul SILVARREY RODRIGUEZ                                                                     |
|                                  | Study Coordinator(s)    | Juan Manuel GARCIA SANCHEZ                                                                                                                                                                                                                                            |
| Burgos University Hospital       | Principal Investigator  | Yolanda BRAVO ANGUIANO                                                                                                                                                                                                                                                |
|                                  | Co-Investigator(s)      | Monica BARTULOS IGLESIAS, Daniel PASCUAL CARRASCAL, Francisco Javier RODRIGUES PEGUERO, Jose Maria TREJO GABRIEL Y GALAN                                                                                                                                              |
| Girona University Hospital       | Principal Investigators | Maria del Mar CASTELLANOS RODRIGO, Joaquin SERENA                                                                                                                                                                                                                     |
|                                  | Co-Investigator(s)      | Berta ALEMANY PERNA, Saima BASHIR, Irene BRAGADO, Cristina COLL, Ana COTS, Mar IRIDA LLORET VILLAS, Fabian MARQUEZ, Yolanda SILVA, Mikel TERCENO, Karol Enrique USCAMAITA, Cecile VAN EENDENBURG                                                                      |

|                           |                        |                                                                                                                                                     |
|---------------------------|------------------------|-----------------------------------------------------------------------------------------------------------------------------------------------------|
|                           | Study Coordinator(s)   | Berta JORDAN, Martha KAZIMIERCZAK, Laura PARDO                                                                                                      |
| Hospital del Mar          | Principal Investigator | Jaume ROQUER                                                                                                                                        |
|                           | Co-Investigator(s)     | Elisa CUADRADO, Eva GIRALT, Jordi JIMENEZ CONDE, Angel OIS, Ana RODRIGUEZ, Rosa VIVANCO                                                             |
|                           | Study Coordinator(s)   | Gemma ROMERAL                                                                                                                                       |
| Hospital Donostia         | Principal Investigator | Ana Maria DE ARCE BORDA                                                                                                                             |
|                           | Co-Investigator(s)     | Noemi DIEZ GONZALEZ, Felix GONZALEZ LOPEZ, Maria Begona MARTINEZ PINEIRO, Maria Teresa MARTINEZ ZABALETA, Mikel TAINTA CUEZVA, Miren ZULAICA IJURCO |
| La Fe University Hospital | Principal Investigator | Aida LAGO                                                                                                                                           |
|                           | Co-Investigator(s)     | Gerardo FORTEA, Rogelio LOPEZ, Lluís MORALES-CABA, Jose Ignacio TEMBL Patricia SAHUQUILLO                                                           |
|                           | Study Coordinator(s)   |                                                                                                                                                     |
| Miguel Servet Hospital    | Principal Investigator | Javier MARTA-MORENO                                                                                                                                 |
|                           | Co-Investigator(s)     | Jorge ARTAL, Rocio CALDU, Ariadna FERNÁNDEZ, Marta SERRANO, Herbert TEJADA MEZA                                                                     |
|                           | Study Coordinator(s)   | Maria SERAL-MORAL                                                                                                                                   |
| Vall d'Hebron Hospital    | Principal Investigator | Carlos MOLINA                                                                                                                                       |
|                           | Co-Investigator(s)     | Sandra BONED, Jesus JUEGA, Marian MUCHADA, Noelia RODRIGUEZ                                                                                         |
|                           | Study Coordinator(s)   | Estela SANJUAN                                                                                                                                      |
| <b>UNITED KINGDOM</b>     | <i>Country Lead:</i>   | James KENNEDY                                                                                                                                       |

| Site                   | Role                   | Team Member                                                                                                      |
|------------------------|------------------------|------------------------------------------------------------------------------------------------------------------|
| Addenbrooke's Hospital | Principal Investigator | Kayvan KHADJOOI                                                                                                  |
|                        | Co-Investigator(s)     | Denish CHANDRASENA<br>Sarah CRISP, Nick EVANS, Barnaby FIDDES, Niamh HANNON, Derek HAYDEN, Helen HAYHOE, Siobhan |

|                                       |                                              |                                                                                                                                                                                        |
|---------------------------------------|----------------------------------------------|----------------------------------------------------------------------------------------------------------------------------------------------------------------------------------------|
|                                       | Study Coordinator(s)                         | KELLY, Eoin O'BRIEN, Elizabeth WARBURTON<br>Elaine AMIS, Charlotte FARRON, Jennifer MITCHELL                                                                                           |
| John Radcliffe Hospital               | Principal Investigator<br>Co-Investigator(s) | James KENNEDY<br>Gary FORD, Philip MATHIESON, Sara MAZZUCCO, George POPE, Ian RECKLESS, Ursula SCHULZ, Ku SHAH Rachel TEAL                                                             |
|                                       | Study Coordinator(s)                         |                                                                                                                                                                                        |
| Luton & Dunstable University Hospital | Principal Investigator<br>Co-Investigator(s) | Lakshmanan SEKARAN<br>Lankanatha ALWIS, Niaz MOHAMMAD, Johnson PHILIPPANATHAN, Duke PHIRI, Sakthivel SETHURAMAN Margaret TATE                                                          |
|                                       | Study Coordinator(s)                         |                                                                                                                                                                                        |
| Northwick Park Hospital               | Principal Investigator<br>Co-Investigator(s) | David COHEN<br>Mudhar ABDUL-SAHAB, Lankanatha ALWIS, Raj BATHULA, Joe DEVINE, Silvie DOUBRAVSKA, Radim LICENIK, Mmua NGWAKO, Nabeela NISAR, Aravinth SIVAGNANARATNAM Mushiya MPELEMBUE |
|                                       | Study Coordinator(s)                         |                                                                                                                                                                                        |
| Queen Elizabeth University Hospital   | Principal Investigator<br>Co-Investigator(s) | Keith MUIR<br>Barath CHERIPELLI, Jennifer ELLIOT, Xuya HUANG, Dheeraj KALLADKA, Fiona MORETON, Sankaranarayanan RAMACHANDRAN, Salwa EL TAWIL Wilma SMITH                               |
|                                       | Study Coordinator(s)                         |                                                                                                                                                                                        |
| Royal Stoke University Hospital       | Principal Investigator<br>Co-Investigator(s) | Indira NATARAJAN<br>Jayan CHEMBALA, Christine ROFFE, Ranjan SANYAL, Anushka WARUSEVITANE, Janaka WEERATHUNGA Racquel CARPIO                                                            |
|                                       | Study Coordinator(s)                         |                                                                                                                                                                                        |
| Royal United Hospital                 | Principal Investigator                       | Lukuman GBADAMOSHI                                                                                                                                                                     |

|                              |                        |                                                                                      |
|------------------------------|------------------------|--------------------------------------------------------------------------------------|
|                              | Co-Investigator(s)     | James CHOULERTON, Lindsey DOW, Helen NEWTON, Kate PEACOCK, Louise SHAW, Andrew STONE |
|                              | Study Coordinator(s)   | Joanne AVIS, Suzanne LUCAS, Barbara MADIGAN                                          |
| Southampton General Hospital | Principal Investigator | Nic WEIR                                                                             |
|                              | Co-Investigator(s)     | Pam CRAWFORD, Sue EVANS, James MARIGOLD, Emma WOOD                                   |
|                              | Study Coordinator(s)   | Imogen GARTRELL, Simon SMITH                                                         |
| University College Hospital  | Principal Investigator | Richard PERRY                                                                        |
|                              | Co-Investigator(s)     | Gargi BANERGEE, Duncan WILSON                                                        |
|                              | Study Coordinator(s)   | Azra BANARAS, Caroline WATCHURST                                                     |

**UNITED STATES**

*NETT Hub Principal Investigators:* Opeolu ADEOYE, Tom AUFDERHEIDE, Jill BAREN, Michelle BIROS, Cliff CALLAWAY, Jan CLAASSEN, Kurt DENNINGHOFF, Nina GENTILE, Joshua GOLDSTEIN, Claude HEMPHILL, Roger HUMPHRIES, Elizabeth JONES, Steven LEVINE, Christopher LEWANDOWSKI, Joseph ORNATO, James QUINN, Sidney STARKMAN, Barney STERN, Michel TORBEY, Craig WARDEN, Robert WELCH, David WRIGHT

| <b>Site</b>                  | <b>Role</b>            | <b>Team Member</b>                                                                                                                                                                                                                       |
|------------------------------|------------------------|------------------------------------------------------------------------------------------------------------------------------------------------------------------------------------------------------------------------------------------|
| Abbott Northwestern Hospital | Principal Investigator | Mark YOUNG                                                                                                                                                                                                                               |
|                              | Co-Investigator(s)     | Michelle BIROS, Mustapha EZZEDDINE, Pezhman ROOHANI, Holly SWANSON-CARROLL, Ronald TARREL                                                                                                                                                |
|                              | Study Coordinator(s)   | Jennifer FEASE, Sarah HOCHSPRUNG                                                                                                                                                                                                         |
| Abington Memorial Hospital   | Principal Investigator | Dan GZESH                                                                                                                                                                                                                                |
|                              | Co-Investigator(s)     | Jill BAREN, James COOK, Brett CUCCHIARA, Franklin DIAMOND, Lee HARRIS, Karin KELLERMAN, John KHOURY, Brad KLEIN, Laurie KNEPPER, Osman KOZAK, Kandan KULANDAIVEL, Larami MACKENZIE, Jennifer MCGOWAN TRAINER, Qaisar SHAH, David WEISMAN |
|                              | Principal Investigator | Franklin MARDEN                                                                                                                                                                                                                          |

|                                     |                         |                                                                                                                                                                                    |
|-------------------------------------|-------------------------|------------------------------------------------------------------------------------------------------------------------------------------------------------------------------------|
| Alexian Brothers Medical Center     | Co-Investigator(s)      | Michele BEY, Phil GORELICK, Colleen HARRISON, Alkesh PATEL, Anna RAIMONDI, Ginger REILLY, Merrel REISS, Sanford SHERMAN, Theresa TERNA                                             |
|                                     | Study Coordinator(s)    | Michele BEY, Elizabeth FOX (KIM)                                                                                                                                                   |
| Allegheny General Hospital          | Principal Investigators | Hebah HEFZY, Ashis TAYAL                                                                                                                                                           |
|                                     | Co-Investigator(s)      | Beth BREMNER, Edward GETTINGS, Omar HAMMAD, Judy JAROUSE, Michael MARYNOWSKI, John O'NEILL, Ramnath RAMANATHAN, Laxmi SHAH, Arvind VENKAT, Crystal WONG, David WRIGHT              |
|                                     | Study Coordinator(s)    | Vibha CHAUHAN, Gail LOVE, Melissa TIAN                                                                                                                                             |
| Aria Health Frankford Campus        | Principal Investigators | Nina GENTILE, Joshua SIMON, Gerald WYDRO                                                                                                                                           |
|                                     | Co-Investigator(s)      | Pamela GOLDMAN, Mercedes JACOBSON                                                                                                                                                  |
|                                     | Study Coordinator(s)    | Hannah REIMER                                                                                                                                                                      |
| Augusta Health                      | Principal Investigator  | Robert MCMAHON                                                                                                                                                                     |
|                                     | Co-Investigator(s)      | Roger GILDERSLEEVE                                                                                                                                                                 |
|                                     | Study Coordinator(s)    | Rebecca CUTLIP                                                                                                                                                                     |
| Augusta University Medical Center   | Principal Investigator  | Jeffrey SWITZER                                                                                                                                                                    |
|                                     | Co-Investigator(s)      | Feroze AFZAL, Tia ARYAL, Viken BABIKIAN, Askiel BRUNO, Hartmut GROSS, David HESS, Julie JORDAN, Candelario LASERNA, Fenwick NICHOLS, Brenda ROSSON, Mihaela SALER, Shannon STEWART |
|                                     | Study Coordinator(s)    | Natalie BISHOP, Erin CHRISTENSEN, Brian CLOSE, Kori WILLIAMS                                                                                                                       |
| Aurora St. Luke's Medical Center    | Principal Investigators | Arvind AHUJA, Khaled ASI, Elizabeth MARRIOTT, Rehan SAJJAD                                                                                                                         |
|                                     | Co-Investigator(s)      | Tom AUFDERHEIDE, Akram SHHADEH                                                                                                                                                     |
|                                     | Study Coordinator(s)    | Carol HALLIDAY, Marilyn MILLER, Lynda YANNY                                                                                                                                        |
| Baltimore Washington Medical Center | Principal Investigator  | Sangjin OH                                                                                                                                                                         |
|                                     | Co-Investigator(s)      | Carolyn CRONIN, Barney STERN                                                                                                                                                       |
|                                     | Study Coordinator(s)    | Virginia GANLEY, Jill HECKENDORF                                                                                                                                                   |
|                                     | Principal Investigator  | Jeremy PAYNE                                                                                                                                                                       |

|                                                  |                                                                          |                                                                                                                                                                                                                                                                                                                                            |
|--------------------------------------------------|--------------------------------------------------------------------------|--------------------------------------------------------------------------------------------------------------------------------------------------------------------------------------------------------------------------------------------------------------------------------------------------------------------------------------------|
| Banner Good Samaritan Medical Center             | Co-Investigator(s)<br>Study<br>Coordinator(s)                            | Douglas FRANZ, Paola LINYARD, Emily RAY, Aleksander TKACH<br>Tony DENISON                                                                                                                                                                                                                                                                  |
| Banner University Medical Center - South Campus  | Principal Investigator<br>Co-Investigator(s)<br>Study<br>Coordinator(s)  | Kendra DRAKE<br>Katherine BONSELL, Kurt DENNINGHOFF, Chelsea KIDWELL, David NGUYEN, Jennifer TAY<br>Isabelle CHEA, Kathryn SCHIERLING                                                                                                                                                                                                      |
| Banner University Medical Center - Tucson Campus | Principal Investigators<br>Co-Investigator(s)<br>Study<br>Coordinator(s) | Kendra DRAKE, Farshad SHIRAZI<br>Katherine BONSELL, Kurt DENNINGHOFF, Chelsea KIDWELL<br>David NGUYEN, Jennifer TAY<br>Bruce BARNHART, Isabelle CHEA, Karen LUTRICK, Kathryn SCHIERLING                                                                                                                                                    |
| Barnes Jewish Hospital                           | Principal Investigators<br>Co-Investigator(s)<br>Study<br>Coordinator(s) | Laura HEITSCH, Pete PANAGOS<br>Opeolu ADEOYE, Alla AL-HABIB, Hesham ALLAM, Vamshi BALASETTI, Christian BURRELL, David CARPENTER, David CURFMAN, Christopher DELINE, Colin DERDEYN, Javon EDGECOMBE, Andria FORD, Derek HOLDER, Naim KHOURY, Tobias KULIK, Gyan KUMAR, Jin-Moo LEE, Christopher LEON-GUERRERO, Art PANCIOLI<br>Jill NEWGENT |
| Ben Taub General Hospital                        | Principal Investigators<br>Co-Investigator(s)<br>Study<br>Coordinator(s) | Dick KUO, Paulina SERGOT<br>Haitham HUSSEIN, Elizabeth JONES, Joseph KASS<br>Kelly KEENE                                                                                                                                                                                                                                                   |
| Benefis Hospitals Inc                            | Principal Investigator<br>Co-Investigator(s)<br>Study<br>Coordinator(s)  | Dennis DIETRICH<br>William HENNING<br>Laura ARMSTRONG, MegAnne CASEY, Veronica SCHAEFER                                                                                                                                                                                                                                                    |
| Beth Israel Deaconess Medical Center             | Principal Investigator<br>Co-Investigator(s)                             | Nathan SHAPIRO<br>Leslie BILELLO, Jeremy CAREY, Jonathan EDLOW, Lester LEUNG, Vasileios-Arsenios LIOUTAS, Mark MCALLISTER, Magdy SELIM, Edward ULLMAN                                                                                                                                                                                      |



|                                        | Study Coordinator(s)                          | Sharon HAYES, James WAREING                                                                                                                                                                                                                                                                                                                                                                                                                                                                                                                                                                                                                                                                                            |
|----------------------------------------|-----------------------------------------------|------------------------------------------------------------------------------------------------------------------------------------------------------------------------------------------------------------------------------------------------------------------------------------------------------------------------------------------------------------------------------------------------------------------------------------------------------------------------------------------------------------------------------------------------------------------------------------------------------------------------------------------------------------------------------------------------------------------------|
| Bethesda North Hospital                | Principal Investigators<br>Co-Investigator(s) | Rahul KARAMCHANDANI, Kyle WALSH<br><br>Opeolu ADEOYE, Jordan BONOMO, Joseph BRODERICK, Rhonda CADENA, Elisheva COLEMAN, Felipe DE LOS RIOS LA ROSA, Stacie DEMEL, Bryan ECKERLE, Simona FERIOLI, Matthew FLAHERTY, Rachel GARVIN, Anna GENSIC, Sabreena GILLOW, Aaron GROSSMAN, Jonah GROSSMAN, Laura HEITSCH, Adam JASNE, Daniel KANTER, Brian KATZ, Pooja KHATRI, Brett KISSELA, Dawn KLEINDORFER, William KNIGHT, Natalie KREITZER, Julian MACEDO, Jason MACKEY, Sharyl MARTINI, Erin MCDONOUGH, Eva MISTRY, Meena MUNSHI, Brian OLOIZIA, Art PANCIOLI, Katrina PEARISO, Jonathan RATCLIFF, Sameer SHARMA, Blake SMITH, Michael STAR, Brian STETTLER, Daniel WOO, Muhammad ZAGHLOULEH<br>Shannon DEEDS, Sara KEEGAN |
|                                        | Study Coordinator(s)                          |                                                                                                                                                                                                                                                                                                                                                                                                                                                                                                                                                                                                                                                                                                                        |
| Bon Secours St. Francis Medical Center | Principal Investigators<br>Co-Investigator(s) | Chi-Kin NG, Amandeep SANGHA<br><br>Daniel ANGELI, Mudassar ASGHAR, Stacey EPPS, Patricia LANE<br>April CAMPBELL, Lavon HARRIS                                                                                                                                                                                                                                                                                                                                                                                                                                                                                                                                                                                          |
|                                        | Study Coordinator(s)                          |                                                                                                                                                                                                                                                                                                                                                                                                                                                                                                                                                                                                                                                                                                                        |
| Bon Secours St. Mary's Hospital        | Principal Investigators<br>Co-Investigator(s) | Chi-Kin NG, Amandeep SANGHA, Alan SCHULMAN<br>Matthew BOYCE, Robert COHEN, Rachel DONALDSON, Supakunya EDMONSON, Stacey EPPS, Daniel HARDY, Kim HARRIS, Francis MCGEE, John O'BANNON, Mary RANSOM, Noma REHMAN, Thomas SMITH, Brian STUCKI, Robert WHITE, John WITTMAN<br>April CAMPBELL, Ileana KINNIE, Tamika WALTHOUR                                                                                                                                                                                                                                                                                                                                                                                               |
|                                        | Study Coordinator(s)                          |                                                                                                                                                                                                                                                                                                                                                                                                                                                                                                                                                                                                                                                                                                                        |
| Boston Medical Center                  | Principal Investigators                       | Carlos KASE, Jose Rafael ROMERO                                                                                                                                                                                                                                                                                                                                                                                                                                                                                                                                                                                                                                                                                        |

|                                                 |                        |                                                                                                                                                                                                                                                                                                                                                                                                                                                                                                                                                                                                                      |
|-------------------------------------------------|------------------------|----------------------------------------------------------------------------------------------------------------------------------------------------------------------------------------------------------------------------------------------------------------------------------------------------------------------------------------------------------------------------------------------------------------------------------------------------------------------------------------------------------------------------------------------------------------------------------------------------------------------|
|                                                 | Co-Investigator(s)     | Syed ABBAS, Hugo APARICIO, Viken BABIKIAN, Erica CAMARGO, Anna CERVANTES, David GREER, Julie GRIMES, Feliks KOYFMAN, Hesham MASOUD, Sumeet MULTANI, Varun NARAGUM, Thanh NGUYEN, Aleksandra PIKULA, Rony SALEM, Courtney SCOTT, Malveeka SHARMA, Ashkan SHOAMANESH, Nicholas TARLOV                                                                                                                                                                                                                                                                                                                                  |
|                                                 | Study Coordinator(s)   | Christopher CARR, Danielle DOUSA, Helena LAU, Matthew OGRODNIK, Tudor STURZOIU                                                                                                                                                                                                                                                                                                                                                                                                                                                                                                                                       |
| Brigham and Women's Hospital                    | Principal Investigator | Daniel PALLIN                                                                                                                                                                                                                                                                                                                                                                                                                                                                                                                                                                                                        |
|                                                 | Co-Investigator(s)     | Imoigele AISIKU, Edilberto AMORIM, Philip ANDERSON, Khamid BAKHADIROV, Matthew BEVERS, Calvin BROWN, Xuemei CAI, David CHUNG, Ming-Cheih DING, Brian EDLOW, Guido FALCONE, Sarah FRASURE, Scott GOLDBERG, Eric GORALNICK, Peter HOU, Saef IZZY, Guruprasad JAMBAULIKAR, Ruchira JHA, Minjee KIM, Joshua KOSOWSKY, Ariane LEWIS, Sanjay MENON, Sarah NELSON, Ziad OBERMEYER, Kelli O'LAUGHLIN, Casey OLM-SHIPMAN, Kei OUCHI, Siddharth PARMAR, Nils PETERSEN, Chia-Ling PHUAH, Charles POZNER, Ali RAZMARA, Jeremiah SCHUUR, Raghu SEETHALA, Shreyansh SHAH, Sarah WAHLSTER, Scott WEINER, Sahar ZAFAR, Eli ZIMMERMAN |
|                                                 | Study Coordinator(s)   | Rachel CATLIN, Rebecca GISH, Emily JAMIESON, Conor NAROVEC                                                                                                                                                                                                                                                                                                                                                                                                                                                                                                                                                           |
| Buffalo General Medical Center                  | Principal Investigator | Marilou CHING                                                                                                                                                                                                                                                                                                                                                                                                                                                                                                                                                                                                        |
|                                                 | Co-Investigator(s)     | Luis ARANGUA, Christopher DELINE, Amit KANDEL, Rakesh MAGUN, Bijal MEHTA, Maxim MOKIN, Ashkan MOWLA, Robert SAWYER, Peyman SHIRANI                                                                                                                                                                                                                                                                                                                                                                                                                                                                                   |
|                                                 | Study Coordinator(s)   | Trevor CHICHELLI, Anne Marie CRUMLISH, Kathy PARKES                                                                                                                                                                                                                                                                                                                                                                                                                                                                                                                                                                  |
| California Pacific Medical Center Davies Campus | Principal Investigator | Nobl BARAZANGI                                                                                                                                                                                                                                                                                                                                                                                                                                                                                                                                                                                                       |
|                                                 | Co-Investigator(s)     | Ermias AYTENFISU, Ann BEDENK, Charlene CHEN, Shirley CHEN, Billy GAO, Victor JARAMILLO, Elena PODOLSKAYA, Jessica REDFORD, Jack ROSE, Oana SPATARU, David TONG, Christine WONG                                                                                                                                                                                                                                                                                                                                                                                                                                       |

|                                                                     | Study Coordinator(s)                                                 | Katie PONTING                                                                                                                                                                                                                                                                                                                                                                                                                                                                                                                                                                                                                                              |
|---------------------------------------------------------------------|----------------------------------------------------------------------|------------------------------------------------------------------------------------------------------------------------------------------------------------------------------------------------------------------------------------------------------------------------------------------------------------------------------------------------------------------------------------------------------------------------------------------------------------------------------------------------------------------------------------------------------------------------------------------------------------------------------------------------------------|
| California Pacific Medical Center Pacific Campus, San Francisco, CA | Principal Investigator<br>Co-Investigator(s)                         | Nobl BARAZANGI<br>Ermias AYTENFISU, Ann BEDENK, Charlene CHEN, Shirley CHEN, Billy GAO, Victor JARAMILLO, Elena PODOLSKAYA, Jessica REDFORD, Jack ROSE, Oana SPATARU, David TONG, Christine WONG<br>Katie PONTING                                                                                                                                                                                                                                                                                                                                                                                                                                          |
| Carolinas Medical Center                                            | Principal Investigator<br>Co-Investigator(s)<br>Study Coordinator(s) | Phaniraj IYENGAR, Sanjay IYER<br>Andrew ASIMOS, Aristides CHACONAS, Joseph GIORDANO, Anita HOYT, Swatiben PATEL, Darla STEVENS, Mary TRAYNOR<br>Nicol BRANDON, Anja DAILEY, Megan KRAMER, Marlow PRICE, Blondene ROBINSON                                                                                                                                                                                                                                                                                                                                                                                                                                  |
| Cedars-Sinai Medical Center                                         | Principal Investigator<br>Co-Investigator(s)<br>Study Coordinator(s) | Shlee SONG<br>Oana DUMITRASCU, Duy LE, Patrick LYDEN, Fernando MAYORBASTO, Mani NEZHAD, Konrad SCHLICK, Mohammad SHAFIE, Yilin SHEK<br>Peter Chang KIM                                                                                                                                                                                                                                                                                                                                                                                                                                                                                                     |
| Chandler Regional Medical Center                                    | Principal Investigator<br>Co-Investigator(s)<br>Study Coordinator(s) | Brian TIFFANY<br>Hemant PANDEY, Euly SMITH<br>Annette RUIZ TAYLOR                                                                                                                                                                                                                                                                                                                                                                                                                                                                                                                                                                                          |
| Christ Hospital                                                     | Principal Investigator<br>Co-Investigator(s)<br>Study Coordinator(s) | Rahul KARAMCHANDANI, Kyle WALSH<br>Opeolu ADEOYE, Jordan BONOMO, Joseph BRODERICK, Elisheva COLEMAN, Felipe DE LOS RIOS LA ROSA, Stacie DEMEL, Bryan ECKERLE, Simona FERIOLI, Matthew FLAHERTY, Rachel GARVIN, Anna GENSIC, Sabreena GILLOW, Aaron GROSSMAN, Jonah GROSSMAN, Adam JASNE, Daniel KANTER, Brian KATZ, Pooja KHATRI, Brett KISSELA, Dawn KLEINDORFER, William KNIGHT, Natalie KREITZER, Julian MACEDO, Sharyl MARTINI, Erin MCDONOUGH, Meena MUNSHI, Brian OLOIZIA, Art PANCIOLI, Katrina PEARISO, Jonathan RATCLIFF, Sameer SHARMA, Blake SMITH, Michael STAR, Brian STETTLER, Daniel WOO, Muhammad ZAGHLOULEH<br>Shannon DEEDS, Sara KEEGAN |

|                              |                        |                                                                                                                                                                                                                                                                                                                                                                                                                                                                                                                                                                                                                   |
|------------------------------|------------------------|-------------------------------------------------------------------------------------------------------------------------------------------------------------------------------------------------------------------------------------------------------------------------------------------------------------------------------------------------------------------------------------------------------------------------------------------------------------------------------------------------------------------------------------------------------------------------------------------------------------------|
| Christiana Hospital          | Principal Investigator | Jason NOMURA                                                                                                                                                                                                                                                                                                                                                                                                                                                                                                                                                                                                      |
|                              | Co-Investigator(s)     | Barbara-Jean ALBANI, Jill BAREN, Richard BOUNDS, Michael BREYER, Brian BURGESS, Richard CHOI, Mary CIECHANOWSKI, Christian COLETTI, David COOK, Valerie DECHANT, Colleen ELLIS, Eileen EVANGELISTA, Heather FARLEY, Jenna FREDETTE, Kimberly GANNON, Leila GETTO, Ben GOODGAME, Angelo GRILLO, Anilkumar JASANI, John JESUS, David KAHN, Brian LEVINE, Patrick MATTHEWS, Jonathan MCGHEE, Jennifer MINK, Anthony MUNSON, Jason NACE, John POWELL, Jonathan RASER-SCHRAMM, Charles REESE, Sudhakar SATTI, Timothy SHIUH, Paul SIERZENSKI, Justin STOWENS, Waimei Amy TAI, Emilio VOLZ, Eli ZESERSON, George ZLUPKO |
|                              | Study Coordinator(s)   | Amy CHERICO, Cynthia HOON                                                                                                                                                                                                                                                                                                                                                                                                                                                                                                                                                                                         |
| Cleveland Clinic             | Principal Investigator | Irene KATZAN                                                                                                                                                                                                                                                                                                                                                                                                                                                                                                                                                                                                      |
|                              | Co-Investigator(s)     | Mahmoud AL-MASRY, Andrew BULETKO, Luzma CARDONA, Russell CEREJO, Esteban CHENG-CHING, Abeer FARRAG, Pravin GEORGE, Shazam HUSSAIN, Ahmed ITRAT, Seby JOHN, Zashaun KHAWAJA, Mei LU, ShuMei MAN, Jason MATHEW, Johanna MORTON, Naresh MULLAGURI, Andrew RUSSMAN, Lakshmi SHANKAR, Lila SHEIKHI, Ather TAQUI, Tapan THACKER, Gabor TOTH, Ken UCHINO, Paul WASIELEWSKI, Dolora WISCO                                                                                                                                                                                                                                 |
|                              | Study Coordinator(s)   | Vikram PUVENNA, Amy RICHMOND, Nancie TIGHE                                                                                                                                                                                                                                                                                                                                                                                                                                                                                                                                                                        |
| Cleveland Regional           | Principal Investigator | Gaurang PALIKH                                                                                                                                                                                                                                                                                                                                                                                                                                                                                                                                                                                                    |
|                              | Study Coordinator(s)   | Rayna EDWARDS, Amelia REYNOLDS                                                                                                                                                                                                                                                                                                                                                                                                                                                                                                                                                                                    |
| Columbia St. Mary's Hospital | Principal Investigator | Tom AUFDERHEIDE                                                                                                                                                                                                                                                                                                                                                                                                                                                                                                                                                                                                   |
|                              | Co-Investigator(s)     | Michael CONNOR, Marc LAZZARO, John LYNCH                                                                                                                                                                                                                                                                                                                                                                                                                                                                                                                                                                          |
|                              | Study Coordinator(s)   | Amanda EMMRICH, Melissa MENA                                                                                                                                                                                                                                                                                                                                                                                                                                                                                                                                                                                      |
|                              | Principal Investigator | Thomas MIRSEN                                                                                                                                                                                                                                                                                                                                                                                                                                                                                                                                                                                                     |

|                                    |                         |                                                                                                                                                                                                                                                                                                                                                                                                                                                                                          |
|------------------------------------|-------------------------|------------------------------------------------------------------------------------------------------------------------------------------------------------------------------------------------------------------------------------------------------------------------------------------------------------------------------------------------------------------------------------------------------------------------------------------------------------------------------------------|
| Cooper University Hospital         | Co-Investigator(s)      | Jill BAREN, Brigitte BAUMANN, Ankur BHARGAVA, Jia Zhen CHENG, Brett CUCCHIARA, Michael GALLAGHER, Xuan-Lan GRIFFITH, Christopher JONES, Bhavika KAKADIA, Tapan KAVI, Vladimir KLINOV, Mia KO, Dena LITTLE, Neil MASANGKAY, Eric NAGELE, Rajiv NARULA, James NOTO, Alok PATEL, Ruchir SHAH, Umang SHAH, George SHOKRI, Randip TANEJA, Ephrem TEKLEMARIAM, Ryna THEN, Michael WESTON, Furkan YILMAZ                                                                                        |
|                                    | Study Coordinator(s)    | Christine BESWICK, Lisa CAPANO-WEHRLE, Cory HACKMYER, Tamara LEE, Andrew MARCH, Patricia NIBLACK                                                                                                                                                                                                                                                                                                                                                                                         |
| Dartmouth-Hitchcock Medical Center | Principal Investigator  | Timothy LUKOVITS                                                                                                                                                                                                                                                                                                                                                                                                                                                                         |
|                                    | Co-Investigator(s)      | Robin CLARK-ARBOGAST, Richard GODDEAU, Jason JOHNS, Vijay RENGHA, Diana ROJAS-SOTO                                                                                                                                                                                                                                                                                                                                                                                                       |
|                                    | Study Coordinator(s)    | Charlotte JEFFREYS, Margaret NOTESTINE                                                                                                                                                                                                                                                                                                                                                                                                                                                   |
| Dell Seton Medical Center at UT    | Principal Investigator  | TJ MILLING                                                                                                                                                                                                                                                                                                                                                                                                                                                                               |
|                                    | Co-Investigator(s)      | Atheer AHMED BALDAWI, John BEDOLLA, John BERTELSON, Ray BOGITCH, Pat CROCKER, Lisa DAVIS, Ming DING, Kent ELLINGTON, Jessica ERFAN, Clifford Jack FRAIM, Jeffrey HENDERSON, Eric HIGGINBOTHAM, Tameem HUSAIN, Elizabeth JONES, Jefferson MILEY, Johanna MORTON, Todd NASH, Sarah OLSTYN, Sohan PAREKH, Osvaldo PERURENA, Brian PRICE, Sheldon ROCKWOOD, Sara SCOTT, Jason SHEN, Kristen SMOLIK, Christopher TOPEL, Steven WARACH, Walter WERCHAN, Robert WESTON, Ira WOOD, Chris ZIEBELL |
|                                    | Study Coordinator(s)    | Sheree ADAMS, Kristen KIMMERLE, Laura LACHANCE                                                                                                                                                                                                                                                                                                                                                                                                                                           |
| Desert Regional Medical Center     | Principal Investigators | Luis ARANGUA, Ajeet SODHI, M. Asif TAQI                                                                                                                                                                                                                                                                                                                                                                                                                                                  |
|                                    | Co-Investigator(s)      | Robert CLAYCOMB, Glenn Mark FISCHBERG, XIAO-TANG KONG, Andrew NIK, Tami SALAHUDDIN, Nicholas TARLOV                                                                                                                                                                                                                                                                                                                                                                                      |
|                                    | Study Coordinator(s)    | Yasir KHAN                                                                                                                                                                                                                                                                                                                                                                                                                                                                               |
|                                    | Principal Investigators | Anthony LAGINA, Claire PEARSON                                                                                                                                                                                                                                                                                                                                                                                                                                                           |

|                            |                        |                                                                                                                                                                                                                                                                                                                                                                                                                                                                                             |
|----------------------------|------------------------|---------------------------------------------------------------------------------------------------------------------------------------------------------------------------------------------------------------------------------------------------------------------------------------------------------------------------------------------------------------------------------------------------------------------------------------------------------------------------------------------|
| Detroit Receiving Hospital | Co-Investigator(s)     | Benjamin ATKINSON, Pratik BHATTACHARYA, Seemant CHATURVEDI, William COPLIN, Angela GROVES, Amit KANSARA, Phillip LEVY, Ramesh MADHAVAN, Aniel MAJJHOO, Wazim MOHAMED, Meenakshi MUNSHI, Greg NORRIS, Brian O'NEIL, Kumar RAJAMANI, Sunitha ANTHAKUMAR, Robert SHERWIN, Kushak SUCHDEV, Ambooj TIWARI, Preet VARADE, Robert WELCH                                                                                                                                                            |
|                            | Study Coordinator(s)   | Farhan AYZAZ, Saikat BHUIYAN, Valerie MIKA                                                                                                                                                                                                                                                                                                                                                                                                                                                  |
| Eisenhower Medical Center  | Principal Investigator | Bishoy LABIB                                                                                                                                                                                                                                                                                                                                                                                                                                                                                |
|                            | Co-Investigator(s)     | NAMIN-REZA SALARI                                                                                                                                                                                                                                                                                                                                                                                                                                                                           |
|                            | Study Coordinator(s)   | Moheib FAHEIM, Kamel KAMEL, Dianna LABIB                                                                                                                                                                                                                                                                                                                                                                                                                                                    |
| El Camino Hospital         | Principal Investigator | Peter FUNG                                                                                                                                                                                                                                                                                                                                                                                                                                                                                  |
|                            | Study Coordinator(s)   | Inderjit DHOKAL, Rebecca DUNN, Christine KELLER, Ryan SMITH                                                                                                                                                                                                                                                                                                                                                                                                                                 |
| Ellis Hospital             | Principal Investigator | Kejian TANG                                                                                                                                                                                                                                                                                                                                                                                                                                                                                 |
|                            | Co-Investigator(s)     | Abdelhakim DINAR, Francisco GOMEZ                                                                                                                                                                                                                                                                                                                                                                                                                                                           |
|                            | Study Coordinator(s)   | Margie PANETTA                                                                                                                                                                                                                                                                                                                                                                                                                                                                              |
| Emory University Hospital  | Principal Investigator | Michael ROSS                                                                                                                                                                                                                                                                                                                                                                                                                                                                                |
|                            | Co-Investigator(s)     | Aaron ANDERSON, Anika BACKSTER, Samir BELAGAJE, Elizabeth CARROLL, Robin DHARIA, Adam EDWARDS, Tamara ESPINOZA, Michael FRANKEL, Minas GEBRU, Rishi GUPTA, Vijayakumar JAVALKAR, Omar KASS-HOUT, Tareq KASS-HOUT, Carlene KINGSTON, Andrey LIMA, Lisa MERCK, Fadi NAHAB, Raul NOGUEIRA, Mahmoud OBIDEEN, Anwar OSBORNE, Kumiko OWADA, Shelly OZARK, Vishal PATEL, Harrison PEARL, Haseeb RAHMAN, Jonathan RATCLIFF, Ali SAAD, Yasir SALEEM, Aaron STAYMAN, Melanie WINNINGHAM, David WRIGHT |
|                            | Study Coordinator(s)   | Alex HALL, Nick STANLEY                                                                                                                                                                                                                                                                                                                                                                                                                                                                     |
| Emory University           | Principal Investigator | Michael ROSS                                                                                                                                                                                                                                                                                                                                                                                                                                                                                |

|                                                 |                        |                                                                                                                                                                                                                                                                                                                                                                                 |
|-------------------------------------------------|------------------------|---------------------------------------------------------------------------------------------------------------------------------------------------------------------------------------------------------------------------------------------------------------------------------------------------------------------------------------------------------------------------------|
| Hospital<br>Midtown                             | Co-Investigator(s)     | Aaron ANDERSON, Anika BACKSTER, Samir BELAGAJE, Robin DHARIA, Adam EDWARDS, Tamara ESPINOZA, Michael FRANKEL, Minas GEBRU, Rishi GUPTA, Vijayakumar JAVALKAR, Omar KASS-HOUT, Tareq KASS-HOUT, Andrey LIMA, Fadi NAHAB, Raul NOGUEIRA, Mahmoud OBIDEEN, Anwar OSBORNE, Kumiko OWADA, Vishal PATEL, Jonathan RATCLIFF, Ali SAAD, Aaron STAYMAN, Melanie WINNINGHAM, David WRIGHT |
|                                                 | Study Coordinator(s)   | Alex HALL, Nick STANLEY                                                                                                                                                                                                                                                                                                                                                         |
| Essentia Health<br>St. Mary's<br>Medical Center | Principal Investigator | Dimitrios GIANNAKIDIS                                                                                                                                                                                                                                                                                                                                                           |
|                                                 | Co-Investigator(s)     | Linda ANDERSON, Nick ITZIN, Diane ROACH, Ruth THOMSON, Gail WALLACE                                                                                                                                                                                                                                                                                                             |
|                                                 | Study Coordinator(s)   | Erica CHOPSKIE, Karen HARMON, Robert SHULTZ                                                                                                                                                                                                                                                                                                                                     |
| Essentia<br>Health-Fargo                        | Principal Investigator | M. Ziad DARKHABANI                                                                                                                                                                                                                                                                                                                                                              |
|                                                 | Co-Investigator(s)     | Michelle BIROS, Jessica SIMS                                                                                                                                                                                                                                                                                                                                                    |
|                                                 | Study Coordinator(s)   | Mandy BARTLETT, Marlee HURTT                                                                                                                                                                                                                                                                                                                                                    |
| Evanston<br>Hospital                            | Principal Investigator | Rima DAFER, Archie ONG                                                                                                                                                                                                                                                                                                                                                          |
|                                                 | Co-Investigator(s)     | Fulvio GIL, Deb LYNCH, Steven MEYERS, Richard MUNSON                                                                                                                                                                                                                                                                                                                            |
|                                                 | Study Coordinator(s)   | Julie ANDERSON, Sherri LOEB, Mary-Lou MAHER, Stasia Diana ROUSE                                                                                                                                                                                                                                                                                                                 |
| Fairview<br>Southdale<br>Hospital               | Principal Investigator | Mustapha EZZEDDINE                                                                                                                                                                                                                                                                                                                                                              |
|                                                 | Co-Investigator(s)     | Michelle BIROS, David GRESBACK, Alexander ZUBKOV                                                                                                                                                                                                                                                                                                                                |
|                                                 | Study Coordinator(s)   | Audrey HENDRICKSON, Kathleen MILLER, Mindy RUMBOLZ, Julie SCHERBER, Abbey STAUGAITIS                                                                                                                                                                                                                                                                                            |
| Fletcher Allen<br>Hospital of<br>Vermont        | Principal Investigator | Mark GORMAN                                                                                                                                                                                                                                                                                                                                                                     |
|                                                 | Co-Investigator(s)     | Christopher COMMICHAU                                                                                                                                                                                                                                                                                                                                                           |
|                                                 | Study Coordinator(s)   | Cathy GREGORY, Sharon KENNEY                                                                                                                                                                                                                                                                                                                                                    |
| Forsyth<br>Medical Center                       | Principal Investigator | Chere CHASE                                                                                                                                                                                                                                                                                                                                                                     |
|                                                 | Co-Investigator(s)     | Benjamin ANYANWU, Tamas BATHORY, Paul BURKE, Ashley CAMPBELL, Brittney CAMPBELL, Tarek DAKAKNI, Veronica HEATH, Howard KRAFT, Eric MELVIN, Olukayode ONASANYA, Charles STEWART                                                                                                                                                                                                  |
|                                                 | Study Coordinator(s)   | Debra NORWOOD                                                                                                                                                                                                                                                                                                                                                                   |

|                                          |                        |                                                                                                                                                                                                                                                                                                                                                                                                                                                                                                                                                                                                                                       |
|------------------------------------------|------------------------|---------------------------------------------------------------------------------------------------------------------------------------------------------------------------------------------------------------------------------------------------------------------------------------------------------------------------------------------------------------------------------------------------------------------------------------------------------------------------------------------------------------------------------------------------------------------------------------------------------------------------------------|
| Frederick Memorial Hospital              | Principal Investigator | Shahid RAFIQ                                                                                                                                                                                                                                                                                                                                                                                                                                                                                                                                                                                                                          |
|                                          | Study Coordinator(s)   | Tom SHUPP                                                                                                                                                                                                                                                                                                                                                                                                                                                                                                                                                                                                                             |
| Froedtert Memorial Lutheran              | Principal Investigator | John LYNCH                                                                                                                                                                                                                                                                                                                                                                                                                                                                                                                                                                                                                            |
|                                          | Co-Investigator(s)     | Tom AUFDERHEIDE, Diana BOOK, Ann HELMS, Abigail LA NOU, Marc LAZZARO, Michel TORBEY, Osama ZAIDAT                                                                                                                                                                                                                                                                                                                                                                                                                                                                                                                                     |
|                                          | Study Coordinator(s)   | Erin BRANDENBURG, Amanda EMMRICH, Melissa MENA                                                                                                                                                                                                                                                                                                                                                                                                                                                                                                                                                                                        |
| George Washington University Hospital    | Principal Investigator | Kathleen BURGER                                                                                                                                                                                                                                                                                                                                                                                                                                                                                                                                                                                                                       |
|                                          | Co-Investigator(s)     | Richard BENSON, Christopher LEON-GUERRERO, Andrew MELTZER, Zurab NADAREISHVILLI, Diane SAUTER                                                                                                                                                                                                                                                                                                                                                                                                                                                                                                                                         |
|                                          | Study Coordinator(s)   | Radwa ALY, Angela KELLY                                                                                                                                                                                                                                                                                                                                                                                                                                                                                                                                                                                                               |
| Good Samaritan Hospital (Cincinnati, OH) | Principal Investigator | Rahul KARAMCHANDANI, Kyle WALSH                                                                                                                                                                                                                                                                                                                                                                                                                                                                                                                                                                                                       |
|                                          | Co-Investigator(s)     | Opeolu ADEOYE, Jordan BONOMO, Joseph BRODERICK, Rhonda CADENA, Elisheva COLEMAN, Felipe DE LOS RIOS LA ROSA, Stacie DEMEL, Bryan ECKERLE, Simona FERIOLI, Matthew FLAHERTY, Rachel GARVIN, Anna GENSIC, Sabreena GILLOW, Aaron GROSSMAN, Jonah GROSSMAN, Laura HEITSCH, Adam JASNE, Daniel KANTER, Brian KATZ, Pooja KHATRI, Brett KISSELA, Dawn KLEINDORFER, William KNIGHT, Natalie KREITZER, Julian MACEDO, Jason MACKEY, Sharyl MARTINI, Erin MCDONOUGH, Meena MUNSHI, Brian OLOIZIA, Art PANCIOLI, Katrina PEARISO, Jonathan RATCLIFF, Sameer SHARMA, Blake SMITH, Michael STAR, Brian STETTLER, Daniel WOO, Muhammad ZAGHLOULEH |
|                                          | Study Coordinator(s)   | Shannon DEEDS, Sara KEEGAN                                                                                                                                                                                                                                                                                                                                                                                                                                                                                                                                                                                                            |
| Good Samaritan Hospital (San Jose, CA)   | Principal Investigator | Harmeet SACHDEV                                                                                                                                                                                                                                                                                                                                                                                                                                                                                                                                                                                                                       |
|                                          | Co-Investigator(s)     | James QUINN                                                                                                                                                                                                                                                                                                                                                                                                                                                                                                                                                                                                                           |
|                                          | Study Coordinator(s)   | Christine KELLER                                                                                                                                                                                                                                                                                                                                                                                                                                                                                                                                                                                                                      |
|                                          | Principal Investigator | Michael ROSS                                                                                                                                                                                                                                                                                                                                                                                                                                                                                                                                                                                                                          |



|                                      |                         |                                                                                                                                                                                                                                                                                                                                                                                                                                                                                            |
|--------------------------------------|-------------------------|--------------------------------------------------------------------------------------------------------------------------------------------------------------------------------------------------------------------------------------------------------------------------------------------------------------------------------------------------------------------------------------------------------------------------------------------------------------------------------------------|
| Grady Memorial Hospital              | Co-Investigator(s)      | Aaron ANDERSON, Anika BACKSTER, Samir BELAGAJE, Elizabeth ARROLL, Robin DHARIA, Adam EDWARDS, Tamara ESPINOZA, Michael FRANKEL, Minas GEBRU, Rishi GUPTA, Vijayakumar JAVALKAR, Omar KASS-HOUT, Tareq KASS-HOUT, Carlene KINGSTON, Andrey LIMA, Lisa MERCK, Fadi NAHAB, Raul NOGUEIRA, Mahmoud OBIDEEN, Anwar OSBORNE, Kumiko OWADA, Shelly OZARK, Vishal PATEL, Harrison PEARL, Haseeb RAHMAN, Jonathan RATCLIFF, Ali SAAD, Yasir SALEEM, Aaron STAYMAN, Melanie WINNINGHAM, David WRIGHT |
|                                      | Study Coordinator(s)    | Alex HALL, Nick STANLEY                                                                                                                                                                                                                                                                                                                                                                                                                                                                    |
| Great Falls Clinic Hospital          | Principal Investigator  | Dennis DIETRICH                                                                                                                                                                                                                                                                                                                                                                                                                                                                            |
|                                      | Study Coordinator(s)    | Laura ARMSTRONG                                                                                                                                                                                                                                                                                                                                                                                                                                                                            |
| Guilford Neurological Associates     | Principal Investigator  | Pramod SETHI                                                                                                                                                                                                                                                                                                                                                                                                                                                                               |
|                                      | Co-Investigator(s)      | William HICKLING, James LOVE, Michael REYNOLDS, Yijun YAN                                                                                                                                                                                                                                                                                                                                                                                                                                  |
|                                      | Study Coordinator(s)    | Wesley HARBISON, Rizwan SABIR                                                                                                                                                                                                                                                                                                                                                                                                                                                              |
| Hackensack University Medical Center | Principal Investigator  | Chinwe OGEDEGBE                                                                                                                                                                                                                                                                                                                                                                                                                                                                            |
|                                      | Co-Investigator(s)      | Subasini DASH, Joseph FELDMAN, Nina GENTILE, Karen KEATING                                                                                                                                                                                                                                                                                                                                                                                                                                 |
|                                      | Study Coordinator(s)    | Gordon HUIE, Bertha LAKE, Arelis VILLOT-SANTIAGO                                                                                                                                                                                                                                                                                                                                                                                                                                           |
| Hahnemann University Hospital        | Principal Investigators | Ralph RIVIELLO, Mark SAKS                                                                                                                                                                                                                                                                                                                                                                                                                                                                  |
|                                      | Co-Investigator(s)      | Theodore CORBIN, Nina GENTILE, Sharon GRISWOLD-THEODORSON, Todd MCGRATH, Daniel MULLIN, Edward RAMOSKA, Eric STANDER, David TABBY                                                                                                                                                                                                                                                                                                                                                          |
|                                      | Study Coordinator(s)    | Lisa BONACQUISTI, Anne JOHNSON, John MASSEY, Patricia MCNELIS, Romy NOCERA                                                                                                                                                                                                                                                                                                                                                                                                                 |
| Harborview Medical Center            | Principal Investigator  | David TIRSCHWELL                                                                                                                                                                                                                                                                                                                                                                                                                                                                           |
|                                      | Co-Investigator(s)      | Kyra BECKER, Claire CREUTZFELDT, Rizwan KALANI, Marlan KAY, Sandeep KHOT, Will LONGSTRETH, Sara SCHEPP, Jon WEINSTEIN                                                                                                                                                                                                                                                                                                                                                                      |
|                                      | Study Coordinator(s)    | Allison KUNZE, Glenn SCHUBERT, Patricia TANZI                                                                                                                                                                                                                                                                                                                                                                                                                                              |
|                                      | Principal Investigators | Anthony LAGINA, Claire PEARSON                                                                                                                                                                                                                                                                                                                                                                                                                                                             |

|                                           |                         |                                                                                                                                                                                                                                                                                                                                                                                                                                                                                                                                                                        |
|-------------------------------------------|-------------------------|------------------------------------------------------------------------------------------------------------------------------------------------------------------------------------------------------------------------------------------------------------------------------------------------------------------------------------------------------------------------------------------------------------------------------------------------------------------------------------------------------------------------------------------------------------------------|
| Harper University Hospital                | Co-Investigator(s)      | Benjamin ATKINSON, Pratik BHATTACHARYA, Seemant CHATURVEDI, Angela GROVES, Amit KANSARA, Phillip LEVY, Ramesh MADHAVAN, Aniel MAJJHOO, Wazim MOHAMED, Meenakshi MUNSHI, Greg NORRIS, Brian O'NEIL, Kumar RAJAMANI, Sunitha SANTHAKUMAR, Robert SHERWIN, Kushak SUCHDEV, Ambooj TIWARI, Preet VARADE, Robert WELCH                                                                                                                                                                                                                                                      |
|                                           | Study Coordinator(s)    | Farhan AYAZ, Saikat BHUIYAN, Valerie MIKA                                                                                                                                                                                                                                                                                                                                                                                                                                                                                                                              |
| Hartford Hospital                         | Principal Investigator  | Louise MCCULLOUGH                                                                                                                                                                                                                                                                                                                                                                                                                                                                                                                                                      |
|                                           | Co-Investigator(s)      | Catherine HOSLEY, Lauren SANSING, Isaac SILVERMAN                                                                                                                                                                                                                                                                                                                                                                                                                                                                                                                      |
|                                           | Study Coordinator(s)    | Martha AHLQUIST                                                                                                                                                                                                                                                                                                                                                                                                                                                                                                                                                        |
| Hennepin County Medical Center            | Principal Investigators | Michelle BIROS, Mustapha EZZEDDINE, Tapan THACKER                                                                                                                                                                                                                                                                                                                                                                                                                                                                                                                      |
|                                           | Co-Investigator(s)      | Mohammed ALKUWAITI, Shola ALUKO, David ANDERSON, Ganesh ASAITHAMBI, Kristen BARKLOW, Michelle BIROS, Laura FOSTER, Mikayel GRIGORYAN, Ameer HASSAN, Taka HIGASHIMORI, Haitham HUSSEIN, Katherine JACOBY, Chris JANSON, Jessica JARNOT, Daraspreet KAINTH, Amir KHAN, Asif KHAN, Jae KIM, Joni KOPITZKE, Saritha KUNDOOR, Shailesh MALE, Benjamin MILLER, Haejoe PARK, Rwoof RESHI, Gustavo RODRIGUEZ, Divyajot SANDHU, Biggya SAPKOTA, Kenneth SHEA, Nathan SIT, Jamie STARKS, Christopher STREIB, Robert TAYLOR, Wondwossen TEKLE, Huseyin TORE, Haralabos ZACHARATOS |
|                                           | Study Coordinator(s)    | Audrey HENDRICKSON, Kathleen MILLER, Mindy RUMBOLZ, Julie SCHERBER, Abbey STAUGAITIS                                                                                                                                                                                                                                                                                                                                                                                                                                                                                   |
| Henrico Doctors' Hospital - Forest Campus | Principal Investigator  | Alan SCHULMAN                                                                                                                                                                                                                                                                                                                                                                                                                                                                                                                                                          |
|                                           | Co-Investigator(s)      | Matthew BOYCE, Daniel HARDY, George HARRIS, John O'BANNON, Stephen THURSTON, John WITTMAN                                                                                                                                                                                                                                                                                                                                                                                                                                                                              |
|                                           | Study Coordinator(s)    | Melanie JOHNSON, Ileana KINNIE, Tamika WALTHOUR                                                                                                                                                                                                                                                                                                                                                                                                                                                                                                                        |
| Henry Ford Hospital                       | Principal Investigators | Hebah HEFZY, Andrew RUSSMAN                                                                                                                                                                                                                                                                                                                                                                                                                                                                                                                                            |
|                                           | Co-Investigator(s)      | Christopher LEWANDOWSKI, Daniel MILLER, Joseph MILLER, Taher VOHRA                                                                                                                                                                                                                                                                                                                                                                                                                                                                                                     |
|                                           | Study Coordinator(s)    | Shannen BERRY, Anne Marie LUNDELL                                                                                                                                                                                                                                                                                                                                                                                                                                                                                                                                      |

|                                            |                         |                                                                                                                                                                                                                                                                                                                                                                                                                                                                                                                    |
|--------------------------------------------|-------------------------|--------------------------------------------------------------------------------------------------------------------------------------------------------------------------------------------------------------------------------------------------------------------------------------------------------------------------------------------------------------------------------------------------------------------------------------------------------------------------------------------------------------------|
| Henry Ford West Bloomfield Hospital        | Principal Investigators | Hebah HEFZY, Andrew RUSSMAN                                                                                                                                                                                                                                                                                                                                                                                                                                                                                        |
|                                            | Co-Investigator(s)      | Christopher LEWANDOWSKI, Daniel MILLER, Joseph MILLER, Taher VOHRA                                                                                                                                                                                                                                                                                                                                                                                                                                                 |
|                                            | Study Coordinator(s)    | Shannen BERRY, Anne Marie LUNDELL                                                                                                                                                                                                                                                                                                                                                                                                                                                                                  |
| Hollywood Presbyterian Medical Center      | Principal Investigator  | Tamika BURRUS                                                                                                                                                                                                                                                                                                                                                                                                                                                                                                      |
|                                            | Co-Investigator(s)      | Philip ABDOUSH, Christian GALICIA                                                                                                                                                                                                                                                                                                                                                                                                                                                                                  |
|                                            | Study Coordinator(s)    | Laurie BERNDT, Nancy RAPPARD                                                                                                                                                                                                                                                                                                                                                                                                                                                                                       |
| Hospital of the University of Pennsylvania | Principal Investigator  | Brett CUCCHIARA                                                                                                                                                                                                                                                                                                                                                                                                                                                                                                    |
|                                            | Co-Investigator(s)      | Jill BAREN, Lauren BESLOW, Christina BLUM, Christopher FAVILLA, Kimberly GANNON, Koto ISHIDA, Judy JIA, Scott KASNER, Glenn KONSKY, Donna KUROWSKI, Ava LIBERMAN, Caitlin LOOMIS, Jean LUCIANO, Michael MCGARVEY, Steven MESSE, Michael MULLEN, Claude NGUYEN, Swaroop PAWAR, Jonathan RASER-SCHRAMM, Christopher RENNER, David ROSE, Igor RYBINNIK, Lauren SANSING, Neelofer SHAFI, James SIEGLER, Laura STEIN, Sally SULTAN, Jose TORRES, Louis VENTURA, Christina WILSON, QingYang YUAN, Ali ZANDIEH, Cen ZHANG |
|                                            | Study Coordinator(s)    | Katherine BLACKBURN (Lamond), Mary Elizabeth DESANTO                                                                                                                                                                                                                                                                                                                                                                                                                                                               |
| Houston Methodist Hospital                 | Principal Investigator  | David CHIU                                                                                                                                                                                                                                                                                                                                                                                                                                                                                                         |
|                                            | Co-Investigator(s)      | Donald BLEDSOE, Rajan GADHIA, Delmar IMPERIAL-AUBIN, Jason A. LEE, David MCCANE, Vivek MISRA, Eva MISTRY, Ashkan MOWLA, Stacy MOYE, Haseed RAHMAN, Jenny RICHARDSON, Roger RIZZO, Abraham THOMAS, John VOLPI, Shannon WHITE                                                                                                                                                                                                                                                                                        |
|                                            | Study Coordinator(s)    | Arbi OHANIAN                                                                                                                                                                                                                                                                                                                                                                                                                                                                                                       |
| Huntington Memorial Hospital               | Principal Investigator  | Arbi OHANIAN                                                                                                                                                                                                                                                                                                                                                                                                                                                                                                       |
|                                            | Co-Investigator(s)      | Candy CORRAL, Robert GOLDWEBER, Conrad LIANG, Artin MINAEIAN, Sharon YEGIAIAN                                                                                                                                                                                                                                                                                                                                                                                                                                      |
|                                            | Study Coordinator(s)    | Marilyn PEREZ                                                                                                                                                                                                                                                                                                                                                                                                                                                                                                      |
| Ingalls Memorial Hospital                  | Principal Investigator  | Engin YILMAZ                                                                                                                                                                                                                                                                                                                                                                                                                                                                                                       |
|                                            | Co-Investigator(s)      | Tonya FULLER                                                                                                                                                                                                                                                                                                                                                                                                                                                                                                       |
|                                            | Study Coordinator(s)    | Deborah LAWRENCE                                                                                                                                                                                                                                                                                                                                                                                                                                                                                                   |
| Jeanes Hospital                            | Principal Investigator  | Marcia HALPERN                                                                                                                                                                                                                                                                                                                                                                                                                                                                                                     |
|                                            | Co-Investigator(s)      | Nina GENTILE                                                                                                                                                                                                                                                                                                                                                                                                                                                                                                       |

|                                                         |                        |                                                                                                                                                                                                                                                               |
|---------------------------------------------------------|------------------------|---------------------------------------------------------------------------------------------------------------------------------------------------------------------------------------------------------------------------------------------------------------|
|                                                         | Study Coordinator(s)   | Maryellen NELSON                                                                                                                                                                                                                                              |
| Jersey Shore<br>University<br>Medical Center            | Principal Investigator | Stephen MARTINO                                                                                                                                                                                                                                               |
|                                                         | Co-Investigator(s)     | Alan DEUTSCH, John FITZPATRICK, Paul GILSON, Paul KOSTOULAKOS, Mary SEDAROUS, Edward SPELLMAN                                                                                                                                                                 |
|                                                         | Study Coordinator(s)   | Fiona COLLINS, Jennifer ORTIZ                                                                                                                                                                                                                                 |
| JFK Medical<br>Center                                   | Principal Investigator | Jawad KIRMANI, Spozhmy PANEZAI                                                                                                                                                                                                                                |
|                                                         | Co-Investigator(s)     | Jaskiran BRAR, Daniel KORYA, Ashish KULHARI, Siddhart MEHTA, Mohammad MOUSSAVI, Aashish PATEL, Amrinder SINGH, Sara STRAUSS                                                                                                                                   |
|                                                         | Study Coordinator(s)   | Briana DECARVALHO                                                                                                                                                                                                                                             |
| John Muir<br>Medical Center<br>- Concord<br>Campus      | Principal Investigator | Ray STEPHENS                                                                                                                                                                                                                                                  |
|                                                         | Co-Investigator(s)     | Leslie GILLUM, Steven SCHADENDORF                                                                                                                                                                                                                             |
|                                                         | Study Coordinator(s)   | Janice STEPHENS                                                                                                                                                                                                                                               |
| John Muir<br>Medical Center<br>- Walnut Creek<br>Campus | Principal Investigator | Ray STEPHENS                                                                                                                                                                                                                                                  |
|                                                         | Co-Investigator(s)     | Robert ALGAR, Leslie GILLUM, Steven HOLTZ, Janet LIN, Steven SCHADENDORF, Brad VOLPI                                                                                                                                                                          |
|                                                         | Study Coordinator(s)   | Janice STEPHENS                                                                                                                                                                                                                                               |
| Johns Hopkins<br>Hospital                               | Principal Investigator | Victor URRUTIA                                                                                                                                                                                                                                                |
|                                                         | Co-Investigator(s)     | Martinson ARNAN, Mona BAHOUTH, Mario CERDAN-TREVINO, Arjun CHANMUGAN, Yolanda CHIK, Jennifer DEARBORN, Romanus Roland FAIGLE, Ryan FELLING, Peter HILL, Shyian JEN, Richard LEIGH, Rafarl LINAS, Elisabeth MARSH, Bogachan SAHIN, Robert WITYK, Steven ZEILER |
|                                                         | Study Coordinator(s)   | Susan RICE, Jennifer RONALD                                                                                                                                                                                                                                   |
| Kaiser<br>Permanente<br>Los Angeles<br>Medical Center   | Principal Investigator | Zahra AJANI                                                                                                                                                                                                                                                   |
|                                                         | Co-Investigator(s)     | Sierra FORD, Prasanth MANTHENA, Navdeep SANGHA, Theresa SEVILIS, Emanuela SOFRONI                                                                                                                                                                             |
|                                                         | Study Coordinator(s)   | Nancy FLORES, Raymond KIM, Catherine LUI, Vena SOBHAWONGSE, Grace TU, Kim TURNER, Cristina VALDOVINOS                                                                                                                                                         |
| Kings County<br>Hospital Center                         | Principal Investigator | Pia CHATTERJEE, Susan LAW, Steven LEVINE, Richard SINERT                                                                                                                                                                                                      |

|                                                   |                         |                                                                                                                                                                                                                                                                  |
|---------------------------------------------------|-------------------------|------------------------------------------------------------------------------------------------------------------------------------------------------------------------------------------------------------------------------------------------------------------|
|                                                   | Co-Investigator(s)      | Anika BACKSTER, Clotilde BALUCANI, Ethan BRANDLER, Qing HAO, Ashika JAIN, Yongwoo KIM, Adrian MARCHIDANN, Jennifer MARTINDALE, Jay MELTON, Lorenzo PALADINO, Diana ROJAS-SOTO, Artem SUNIK, Benedict TAN, Helen VALSAMIS, Volodymyr VULKANOV, Shahriar ZEHTABCHI |
|                                                   | Study Coordinator(s)    | Vanessa ARNEDO, Marijayne BUSHEY, Nadege GILLES, Saroj KUNNAKKAT, Catherine LUSHBOUGH, Schweta MALHOTRA, Shreya PANDYA, Bryce PETTY, Bruhati SHAH, Jonathan SINGER                                                                                               |
| Legacy Emanuel Medical Center                     | Principal Investigator  | Helmi LUTSEP                                                                                                                                                                                                                                                     |
|                                                   | Co-Investigator(s)      | Wayne CLARK, Alexandra DIMITROVA, Elizabeth NORTH                                                                                                                                                                                                                |
|                                                   | Study Coordinator(s)    | Kelly FEEST, Jonathan FOLEY                                                                                                                                                                                                                                      |
| Lehigh Valley Hospital                            | Principal Investigators | John CASTALDO, Frank-Chen ZHANG                                                                                                                                                                                                                                  |
|                                                   | Co-Investigator(s)      | Gary CLAUSER, Adam EDWARDS, Mohammed EL-HUNJUL, Yevgeniy ISAYEV, Megan LEARY, Yuebing LI, Dev MEHTA, Christopher MELINOSKY, Kenneth REICHENBACH, Hermann SCHUMACHER, Lorraine SPIKOL, Jay VARRATO, Hussam YACOUB                                                 |
|                                                   | Study Coordinator(s)    | Carol FOX, Leighanne HARTMAN, Terry KLOIBER, Susan NABHAN                                                                                                                                                                                                        |
| Lincoln Medical and Mental Health Center          | Principal Investigator  | Shekar MURTHY                                                                                                                                                                                                                                                    |
|                                                   | Co-Investigator(s)      | Madan Mohan Reddy ARUGUNTA, Hussein ASSALLUM, Balavenkatesh KANNA, James ZISFEIN                                                                                                                                                                                 |
|                                                   | Study Coordinator(s)    | Jessica MONTALVO                                                                                                                                                                                                                                                 |
| Long Beach Memorial Medical Center                | Principal Investigator  | Nima RAMEZAN-ARAB                                                                                                                                                                                                                                                |
|                                                   | Co-Investigator(s)      | Nirav S. PATEL, Michael L. THOMPSON                                                                                                                                                                                                                              |
|                                                   | Study Coordinator(s)    | Roxana FLORES, Dena HOPKINS, Françoise TOUSSAINT-JONES, Angie WEST                                                                                                                                                                                               |
| Los Robles Hospital Medical Center, Thousand Oaks | Principal Investigator  | M. Asif TAQI                                                                                                                                                                                                                                                     |
|                                                   | Co-Investigator(s)      | Sajid SURIYA                                                                                                                                                                                                                                                     |
|                                                   | Principal Investigator  | Michael SCHNECK                                                                                                                                                                                                                                                  |

|                                        |                                                                      |                                                                                                                                                                                                                                                                                                                                                                                                                                                                                                                                                                                                                                                                                                                                                                                                                                                                                                                                                                                                                                                                                                 |
|----------------------------------------|----------------------------------------------------------------------|-------------------------------------------------------------------------------------------------------------------------------------------------------------------------------------------------------------------------------------------------------------------------------------------------------------------------------------------------------------------------------------------------------------------------------------------------------------------------------------------------------------------------------------------------------------------------------------------------------------------------------------------------------------------------------------------------------------------------------------------------------------------------------------------------------------------------------------------------------------------------------------------------------------------------------------------------------------------------------------------------------------------------------------------------------------------------------------------------|
| Loyola<br>University<br>Medical Center | Co-Investigator(s)<br>Study Coordinator(s)                           | Jose BILLER, Lisa MILLSAP, Sarkis MORALES-VIDAL<br>Tara BERNIER, Linda CHADWICK, Katelynn PRODOEHL                                                                                                                                                                                                                                                                                                                                                                                                                                                                                                                                                                                                                                                                                                                                                                                                                                                                                                                                                                                              |
| Maimonides<br>Medical Center           | Principal Investigator<br>Co-Investigator(s)<br>Study Coordinator(s) | Steven RUDOLPH<br>Susan LAW, Alina RABINOVICH<br>Holly MORHAIM                                                                                                                                                                                                                                                                                                                                                                                                                                                                                                                                                                                                                                                                                                                                                                                                                                                                                                                                                                                                                                  |
| Manatee<br>Memorial<br>Hospital        | Principal Investigator<br>Co-Investigator(s)<br>Study Coordinator(s) | W. Alvin MCELVEEN<br>Jane BESEN, Ralph GONZALEZ<br>Laurie EMMERT, Ericka MARINO, Vickie ROMAN                                                                                                                                                                                                                                                                                                                                                                                                                                                                                                                                                                                                                                                                                                                                                                                                                                                                                                                                                                                                   |
| Marquette<br>General<br>Hospital       | Principal Investigator<br>Study Coordinator(s)                       | Karl MEISEL<br>Jodi NEASE                                                                                                                                                                                                                                                                                                                                                                                                                                                                                                                                                                                                                                                                                                                                                                                                                                                                                                                                                                                                                                                                       |
| Massachusetts<br>General<br>Hospital   | Principal Investigators<br>Co-Investigator(s)                        | Ferdinando BUONANNO, Scott SILVERMAN<br>Edilberto AMORIM, Christopher ANDERSON, Khamid BAKHADIROV, Ribal BASSIL, Ayush BATRA, Matthew BEVERS, Gregoire BOULOUIS, Xuemei CAI, Andreas CHARIDIMOU, David CHUNG, Ming-Cheih DING, Brian EDLOW, Mark ETHELTON, Guido FALCONE, Ananda FINE, Rajan GADHIA, Anne-Katrin GIESE, Joshua GOLDSTEIN, Andrea HARRIOTT, Leigh HOCHBERG, Saef IZZY, Sameen JAFARI, Ruchira JHA, Abbas KHARAL, Ayaz KHAWAJA, Jennifer KIM, Minjee KIM, William Taylor KIMBERLY, Arne LAUER, David LERNER, Ariane LEWIS, David LIN, Sandro MARINI, Sanjay MENON, Christina MIJALSKI, Andrea MOROTTI, Sarah NELSON, MingMing NING, Casey OLM-SHIPMAN, Charlene ONG, Fadar OTITE, Marco PASI, Nils PETERSEN, Chia-Ling PHUAH, Pedro PINTO, Sergi RAMIREZ MARTINEZ, Shyam RAO, Ali RAZMARA, Jonathan ROSAND, Natalia ROST, Daniel RUBIN, Frieder SCHLUNK, Lee SCHWAMM, Shreyansh SHAH, Richa SHARMA, Starane SHEPHERD, Faheem SHERIFF, Matthew SIKET, Aneesh SINGHAL, Zachary THRELKELD, Anand ENKATRAMAN, Anand VISWANATHAN, Sarah WAHLSTER, Li XIONG, Sahar ZAFAR, Eli ZIMMERMAN |

|                                                                      |                        |                                                                                                                                                                                                          |
|----------------------------------------------------------------------|------------------------|----------------------------------------------------------------------------------------------------------------------------------------------------------------------------------------------------------|
|                                                                      | Study Coordinator(s)   | Lauren BARTON, Ryan CALLAHAN, Kathleen FEENEY, Melissa HOWELL, Eric LOESCH, Blair PARRY, Eric RIKLIN, Chun Mei SU, Greg TIRRELL                                                                          |
| Mayo Clinic                                                          | Principal Investigator | Maria AGUILAR                                                                                                                                                                                            |
|                                                                      | Co-Investigator(s)     | Dan CAPAMPANGAN, Bart DEMAERSCHALK, David DODICK, Timothy INGALL, Terri KIERNAN, Joyce LEE-IANNOTTI, Bert VARGAS, Holly YANCY                                                                            |
|                                                                      | Study Coordinator(s)   | Erica BOYD                                                                                                                                                                                               |
| Mayo Clinic<br>Saint Mary's<br>Campus                                | Principal Investigator | Fernanda BELLOLIO                                                                                                                                                                                        |
|                                                                      | Co-Investigator(s)     | Michelle BIROS, Jennifer FUGATE, Waqas GILANI, James KLAAS                                                                                                                                               |
|                                                                      | Study Coordinator(s)   | Renee CABALKA                                                                                                                                                                                            |
| Medical<br>University of<br>South Carolina<br>University<br>Hospital | Principal Investigator | Christine HOLMSTEDT                                                                                                                                                                                      |
|                                                                      | Co-Investigator(s)     | Robert ADAMS, Opeolu ADEOYE, Charles ANDREWS, Chirantan BANERJEE, Julio CHALELA, Marc CHIMOWITZ, Wuwei FENG, Angela HAYS SHAPSHAK, Edward JAUCH, Shelly OZARK, Art PANCIOLI, Tanya TURAN, Ashley WABNITZ |
|                                                                      | Study Coordinator(s)   | Robert BURFEIND, Cheryl GRANT, Gina KELLER, Vicki STREETS                                                                                                                                                |
| MedStar<br>Washington<br>Hospital Center                             | Principal Investigator | Munish GOYAL                                                                                                                                                                                             |
|                                                                      | Co-Investigator(s)     | Richard BENSON, Rahul BHAT, Amie HSIA, Lisa JACOBSON, Norine MCGRATH, Diane SAUTER                                                                                                                       |
|                                                                      | Study Coordinator(s)   | Theresa MORIARTY                                                                                                                                                                                         |
|                                                                      | Principal Investigator | Elizabeth JONES                                                                                                                                                                                          |

|                                                    |                                                 |                                                                                                                                                                                                                                                                                                                                                                                                                                                                                                                                                                                                                                                                                                                          |
|----------------------------------------------------|-------------------------------------------------|--------------------------------------------------------------------------------------------------------------------------------------------------------------------------------------------------------------------------------------------------------------------------------------------------------------------------------------------------------------------------------------------------------------------------------------------------------------------------------------------------------------------------------------------------------------------------------------------------------------------------------------------------------------------------------------------------------------------------|
| Memorial<br>Hermann Texas<br>Medical Center        | Co-Investigator(s)                              | Arif AZAM, Carrie BAKUNAS, Andres BAYONA, Jonas BEYENE, Caroline BORGAN, Richard BRADLEY, Yashwant CHATHAMPALLY, Andrew COYNE, Daniel DE LOS SANTOS, Pratik DOSHI, Natalie ELLIOTT, Emily ENDACOTT, Lindley FOLKERSON, Christopher FREEMAN, Vanessa GARZA-MIRANDA, Keith GATES, Kasey GILDERSLEEVE, Joshua GUINDON, Kassie HAITZ, Stephen HECHT, Kevin HOFFMAN, Quyen HUYNH, Romeo JOSEPH, Brent KING, James LEONI, Jason LESNICK, Rohith MALYA, Justin MAZZILLO, Omar METWALLI, Amy NOLAND, Michael PANDYA, Andrew POTTER, Eric REICHMAN, David ROBINSON, Michael ROKYTA, Carlos ROLDAN, Jason SATTERFIELD, Paulina SERGOT, Justin SHEPARD, Soa-Yih SHER, Ian SMITH, Jeffrey STOWELL, Salvatore VALENTI, Richard WITKOV |
|                                                    | Study Coordinator(s)                            | Monica MENDOZA-MOORE, Misty OTTMAN                                                                                                                                                                                                                                                                                                                                                                                                                                                                                                                                                                                                                                                                                       |
| Mercy<br>Franciscan<br>Hospital -<br>Mount Airy    | Principal<br>Investigator<br>Co-Investigator(s) | Dawn KLEINDORFER<br>Opeolu ADEOYE, Jordan BONOMO, Joseph BRODERICK, Rhonda CADENA, Felipe DE LOS RIOS LA ROSA, Bryan ECKERLE, Simona FERIOLI, Matthew FLAHERTY, Rachel GARVIN, Anna GENSIC, Aaron GROSSMAN, Laura HEITSCH, Daniel KANTER, Pooja KHATRI, Brett KISSELA, William KNIGHT, Jason MACKEY, Sharyl MARTINI, Erin MCDONOUGH, Meena MUNSHI, Art PANCIOLI, Jonathan RATCLIFF, Blake SMITH, Brian STETTLER, Daniel WOO                                                                                                                                                                                                                                                                                              |
|                                                    | Study Coordinator(s)                            | Irene EWING                                                                                                                                                                                                                                                                                                                                                                                                                                                                                                                                                                                                                                                                                                              |
| Mercy<br>Franciscan<br>Hospital -<br>Western Hills | Principal<br>Investigator<br>Co-Investigator(s) | Dawn KLEINDORFER<br>Opeolu ADEOYE, Jordan BONOMO, Joseph BRODERICK, Rhonda CADENA, Felipe DE LOS RIOS LA ROSA, Bryan ECKERLE, Simona FERIOLI, Matthew FLAHERTY, Rachel GARVIN, Anna GENSIC, Aaron GROSSMAN, Laura HEITSCH, Daniel KANTER, Pooja KHATRI, Brett KISSELA, William KNIGHT, Jason MACKEY, Sharyl MARTINI, Erin MCDONOUGH, Meena MUNSHI, Art PANCIOLI, Jonathan RATCLIFF, Blake SMITH, Brian STETTLER, Daniel WOO                                                                                                                                                                                                                                                                                              |
|                                                    | Study Coordinator(s)                            | Irene EWING                                                                                                                                                                                                                                                                                                                                                                                                                                                                                                                                                                                                                                                                                                              |



|                                   |                        |                                                                                                                                                                                                                                                                                                                                                                                                                                                                               |
|-----------------------------------|------------------------|-------------------------------------------------------------------------------------------------------------------------------------------------------------------------------------------------------------------------------------------------------------------------------------------------------------------------------------------------------------------------------------------------------------------------------------------------------------------------------|
| Mercy General Hospital            | Principal Investigator | Mohammad MAHMOOD, Lucian MAIDAN                                                                                                                                                                                                                                                                                                                                                                                                                                               |
|                                   | Co-Investigator(s)     | Ryan ARMOUR, Asad CHAUDHARY, Edwin CRUZ, Michael-Karsten DENGEL, Ehsan HADI, Marc LENAERTS, Alex NEE, Reza PIRSAHELLI, John SCHAFER, Alan SHATZEL, Peter SKAFF                                                                                                                                                                                                                                                                                                                |
|                                   | Study Coordinator(s)   | Dawn DIORIO, Danielle HORNBUCKLE, Raveca PINTEA, Isabel REYES, Deidre WENTWORTH                                                                                                                                                                                                                                                                                                                                                                                               |
| Mercy Health Saint Mary's         | Principal Investigator | Muhammad FAROOQ                                                                                                                                                                                                                                                                                                                                                                                                                                                               |
|                                   | Co-Investigator(s)     | Christopher GOSHGARIAN, Amy GROENHOUT, Bradley HAVEMAN-GOULD, Jianguong MIN                                                                                                                                                                                                                                                                                                                                                                                                   |
|                                   | Study Coordinator(s)   | Stacy L. SMITH                                                                                                                                                                                                                                                                                                                                                                                                                                                                |
| Mercy Health West Hospital        | Principal Investigator | Rahul KARAMCHANDANI, Kyle WALSH                                                                                                                                                                                                                                                                                                                                                                                                                                               |
|                                   | Co-Investigator(s)     | Opeolu ADEOYE, Jordan BONOMO, Joseph BRODERICK, Elisheva COLEMAN, Stacie DEMEL, Bryan ECKERLE, Simona FERIOLI, Matthew FLAHERTY, Anna GENSIC, Sabreena GILLOW, Jonah GROSSMAN, Adam JASNE, Daniel KANTER, Brian KATZ, Pooja KHATRI, Brett KISSELA, Dawn KLEINDORFER, William KNIGHT, Natalie KREITZER, Julian MACEDO, Erin MCDONOUGH, Brian OLOIZIA, Art PANCIOLI, Katrina PEARISO, Sameer SHARMA, Blake SMITH, Michael STAR, Brian STETTLER, Daniel WOO, Muhammad ZAGHLOULEH |
|                                   | Study Coordinator(s)   | Shannon DEEDS, Sara KEEGAN                                                                                                                                                                                                                                                                                                                                                                                                                                                    |
| Mercy Hospital (Springfield, MO)  | Principal Investigator | Robert DUFF                                                                                                                                                                                                                                                                                                                                                                                                                                                                   |
|                                   | Co-Investigator(s)     | Emily CROUSE, Robert MEDLEY, Darwin RAMIREZ-ABREU                                                                                                                                                                                                                                                                                                                                                                                                                             |
|                                   | Study Coordinator(s)   | Linda THOMPSON                                                                                                                                                                                                                                                                                                                                                                                                                                                                |
| Mercy Hospital (St. Louis, MO)    | Principal Investigator | Judd JENSEN, William LOGAN                                                                                                                                                                                                                                                                                                                                                                                                                                                    |
|                                   | Co-Investigator(s)     | Marnie DONOHOO, Barbara GREEN, David REMPE, Mary WILCOX                                                                                                                                                                                                                                                                                                                                                                                                                       |
| Mercy Hospital and Medical Center | Principal Investigator | Jeffrey KRAMER                                                                                                                                                                                                                                                                                                                                                                                                                                                                |
|                                   | Co-Investigator(s)     | Susan VAUGHAN                                                                                                                                                                                                                                                                                                                                                                                                                                                                 |
|                                   | Study Coordinator(s)   | Amy-Leigh DAVIS, Elonia MARTIN                                                                                                                                                                                                                                                                                                                                                                                                                                                |
| Mercy Hospital of Buffalo         | Principal Investigator | Catalina IONITA                                                                                                                                                                                                                                                                                                                                                                                                                                                               |
|                                   | Co-Investigator(s)     | Lee GUTERMAN, Amy HEYDEN, Peterkin LEE-KWEN, Lorianne PEREIRA                                                                                                                                                                                                                                                                                                                                                                                                                 |

|                                  |                        |                                                                                                                                                |
|----------------------------------|------------------------|------------------------------------------------------------------------------------------------------------------------------------------------|
|                                  | Study Coordinator(s)   | Cheryl CONOVER, Shirley DUANE, Nicole ERNST, Kathy PARKES                                                                                      |
| Mercy San Juan Medical Center    | Principal Investigator | Lucian MAIDAN                                                                                                                                  |
|                                  | Co-Investigator(s)     | Ryan ARMOUR, Asad CHAUDHARY, Edwin CRUZ, Michael-Karsten DENGEL, Ehsan HADI, Alex NEE, Reza PIRSAHELI, John SCHAFER, Alan SHATZEL, Peter SKAFF |
|                                  | Study Coordinator(s)   | Dawn DIORIO, Danielle HORNBUCKLE, Raveca PINTEA, Isabel REYES                                                                                  |
| MetroHealth Medical Center       | Principal Investigator | Joseph HANNA                                                                                                                                   |
|                                  | Co-Investigator(s)     | Michael BAHNTGE, Boris GARBER, Jon SCHROCK, Sandra WERNER, Marc WINKELMAN                                                                      |
|                                  | Study Coordinator(s)   | Dana COOK                                                                                                                                      |
| Miami Valley Hospital            | Principal Investigator | Bradley JACOBS                                                                                                                                 |
|                                  | Co-Investigator(s)     | Jeri BRAUNLIN, Esteban CHENG-CHING, Ahmed FATHY, Jacob KITCHENER, Bryan LUDWIG, Elizabeth MARRIOTT, Robb SNIDER, John TERRY                    |
|                                  | Study Coordinator(s)   | Angela SHOEN                                                                                                                                   |
| Mills Peninsula Medical Center   | Principal Investigator | Mike KOHN                                                                                                                                      |
|                                  | Co-Investigator(s)     | Howard BELFER, Michael COHEN, Michael SIEGEL, Robert TELFER                                                                                    |
|                                  | Study Coordinator(s)   | Anke HEBIG                                                                                                                                     |
| Mission Hospital Memorial Campus | Principal Investigator | Reid TAYLOR                                                                                                                                    |
|                                  | Co-Investigator(s)     | Cindy BENTON, Robin JONES, Jeanette LARSON, Seth LARSON, Rodney LEACOCK, Margaret PERKINS, Alex SCHNEIDER, Nora-Mae-Woolie WISHAM              |
|                                  | Study Coordinator(s)   | Tracy NANNEY                                                                                                                                   |
| Mount Sinai St. Luke's           | Principal Investigator | Ji CHONG                                                                                                                                       |
|                                  | Co-Investigator(s)     | Carolyn BROCKINGTON, Elissa FORY, John NASRALLAH, Christopher TEGTMEYER                                                                        |
|                                  | Study Coordinator(s)   | Larissa BONILLA, Iris HARRIS                                                                                                                   |
| Mount Sinai West                 | Principal Investigator | Ji CHONG                                                                                                                                       |
|                                  | Co-Investigator(s)     | Carolyn BROCKINGTON, Elissa FORY, David LIEBESKIND, John NASRALLAH, Shanna PATTERSON, Christopher TEGTMEYER                                    |

|                                                |                        |                                                                                            |
|------------------------------------------------|------------------------|--------------------------------------------------------------------------------------------|
|                                                | Study Coordinator(s)   | Larissa BONILLA, Iris HARRIS, Renata HARTUNG                                               |
| New York-Presbyterian<br>Brooklyn<br>Methodist | Principal Investigator | Robert BIRKHAHN                                                                            |
|                                                | Co-Investigator(s)     | Alp ARKUN, Jeffrey BENJAMIN, Hilary FAIRBROTHER, Laura MELVILLE                            |
|                                                | Study Coordinator(s)   | Paris DATILLO                                                                              |
| Northern<br>Westchester<br>Hospital            | Principal Investigator | Akira TODO                                                                                 |
|                                                | Co-Investigator(s)     | James DWYER, Miodrag VELIKOVIC                                                             |
|                                                | Study Coordinator(s)   | Jodi BELLANTONI                                                                            |
| NorthShore<br>Glenbrook<br>Hospital            | Principal Investigator | Rima DAFER, Archie ONG                                                                     |
|                                                | Co-Investigator(s)     | Fulvio GIL, Deb LYNCH, Steven MEYERS, Richard MUNSON, Archie ONG, Mark RUBIN               |
|                                                | Study Coordinator(s)   | Julie ANDERSON, Sherri LOEB, Mary-Lou MAHER, Stasia Diana ROUSE                            |
| Northwestern<br>Memorial<br>Hospital           | Principal Investigator | Mark ALBERTS, Richard BERNSTEIN                                                            |
|                                                | Co-Investigator(s)     | Fan CAPRIO, Philip CHANG, Chen LIN, Scott MENDELSON, Shyam PRABHAKARAN, Ilana RUFF TREIBER |
|                                                | Study Coordinator(s)   | Kathryn MUSKOVICH, Erin WYMORE                                                             |
| Norton<br>Brownsboro<br>Hospital               | Principal Investigator | Ali CHOUCAIR, Nadeem TALPUR                                                                |
|                                                | Co-Investigator(s)     | Shervin DASHTI, Roger HUMPHRIES, Tom YAO                                                   |
|                                                | Study Coordinator(s)   | Robyn MCLEAN                                                                               |
| Norton<br>Hospital                             | Principal Investigator | Ali CHOUCAIR, Nadeem TALPUR                                                                |
|                                                | Co-Investigator(s)     | Shervin DASHTI, Roger HUMPHRIES, Tom YAO                                                   |
|                                                | Study Coordinator(s)   | Robyn MCLEAN                                                                               |
|                                                | Principal Investigator | Joshua WILLEY                                                                              |

|                                        |                        |                                                                                                                                                                                                                                                                                                                                                                                                                                                                                                                                                                                                                                                                                                                                                                                                                                                                                                                                                                    |
|----------------------------------------|------------------------|--------------------------------------------------------------------------------------------------------------------------------------------------------------------------------------------------------------------------------------------------------------------------------------------------------------------------------------------------------------------------------------------------------------------------------------------------------------------------------------------------------------------------------------------------------------------------------------------------------------------------------------------------------------------------------------------------------------------------------------------------------------------------------------------------------------------------------------------------------------------------------------------------------------------------------------------------------------------|
| NYP Columbia University Medical Center | Co-Investigator(s)     | Sachin AGARWAL, Fawaz AL MUFTI, Aws ALAWI, Ayham ALKHACHROUM, Neeraj BADJATIA, Andrew BAUERSCHMIDT, Huimahn CHOI, Jan CLAASSEN, Michael CRIMMINS, Barry CZEISLER, Elie DANCOUR, Neha DANGAYACH, Mandip DHAMOON, Charles ESENWA, Andres FERNANDEZ, Brandon FOREMAN, Shivani GHOSHAL, Randeep GILL, Emily GILMORE, Marco GONZALEZ CASTELLON, Jose GUTIERREZ, Khalid HANAFY, Gregory KAPINOS, Tomoko KITAGO, Shouri LAHIRI, Cappi LAY, Kiwon LEE, Tim LEKIC, Guillermo LINARES, Aaron LORD, Ali MAHTA, Rishi MALHOTRA, Adrian MARCHIDANN, Andrew MARTIN, Teresa MAY, Stephan MAYER, Kara R. MELMED, Alexander MERKLER, Eliza MILLER, Nicholas MORRIS, Sumiti NAYAR, Setareh S. OMRAN, Santiago ORTEGA-GUITERREZ, Gunjan PARIKH, Neal S. PARIKH, Nils PETERSEN, Jeremy RAGLAND, Alexandra REYNOLDS, Michael REZNIK, David ROH, Sara ROSTANSKI, Clio A. RUBINOS, Ayesha SHERZAI, Viktor SZEDER, Alan VELANDER, Matthew VIBBERT, Christopher ZAMMIT, Jiaying Jayne ZHANG |
|                                        | Study Coordinator(s)   | Cristina FALO, Angela VELAZQUEZ                                                                                                                                                                                                                                                                                                                                                                                                                                                                                                                                                                                                                                                                                                                                                                                                                                                                                                                                    |
| NYP Weill Cornell Medical Center       | Principal Investigator | Babak NAVI                                                                                                                                                                                                                                                                                                                                                                                                                                                                                                                                                                                                                                                                                                                                                                                                                                                                                                                                                         |
|                                        | Co-Investigator(s)     | Sunday CLARK, Michael CRIMMINS, Barry CZEISLER, Neha DANGAYACH, Jordan DUBOW, Matthew FINK, Brandon FOREMAN, Adam GANZMAN, Dara JAMIESON, Hooman KAMEL, Benjamin KUMMER, Richard LAPPIN, Dana LEIFER, Michael LERARIO, Atul MANGLA, Saad MIR, Sammy PISHANIDAR, Daniel SACCHETTI, Joseph SAFDIEH, Alan SEGAL, Jennifer SEVUSH, Rahul SHARMA, Natalie WEATHERED, Halina WHITE, Christopher ZAMMIT, Yi ZHANG                                                                                                                                                                                                                                                                                                                                                                                                                                                                                                                                                         |
|                                        | Study Coordinator(s)   | Ryna MATHIAS, Blagovest NIKOLOV, Entila XHORI                                                                                                                                                                                                                                                                                                                                                                                                                                                                                                                                                                                                                                                                                                                                                                                                                                                                                                                      |
| O'Connor Hospital                      | Principal Investigator | Raul GUIADO                                                                                                                                                                                                                                                                                                                                                                                                                                                                                                                                                                                                                                                                                                                                                                                                                                                                                                                                                        |
|                                        | Co-Investigator(s)     | Raj GUPTA, Jenelle JINDAL, Xihua SUN                                                                                                                                                                                                                                                                                                                                                                                                                                                                                                                                                                                                                                                                                                                                                                                                                                                                                                                               |
|                                        | Study Coordinator(s)   | Karen DE LA CUESTA, Christine KELLER                                                                                                                                                                                                                                                                                                                                                                                                                                                                                                                                                                                                                                                                                                                                                                                                                                                                                                                               |

|                                             |                         |                                                                                                                                                                                                                                                                                                                                                                                |
|---------------------------------------------|-------------------------|--------------------------------------------------------------------------------------------------------------------------------------------------------------------------------------------------------------------------------------------------------------------------------------------------------------------------------------------------------------------------------|
| Oregon Health & Science University Hospital | Principal Investigator  | Helmi LUTSEP                                                                                                                                                                                                                                                                                                                                                                   |
|                                             | Co-Investigator(s)      | Noah BEADELL, Hormozd BOZORGCHAMI, Wayne CLARK, Amandeep DHILLON, Julia DURRANT, Sierra FORD, Erek HELSETH, Kory HERRICK, David HOAK, Amit KANSARA, Seth KAREUS, Robert LOWE, Theodore LOWENKOPF, Logan MCDANELD, Madeline NGUYEN, Olajide OLOGUNTOYE, Andrew RONTAL, Michelle STACEY, Courtney TAKAHASHI, Craig WARDEN, Stewart WEBER, Corey WHITE, Lisa YANASE, John ZURASKY |
|                                             | Study Coordinator(s)    | Kelly FEEST, Jonathan FOLEY, Kali SEISLER                                                                                                                                                                                                                                                                                                                                      |
| OSU Wexner Medical Center                   | Principal Investigators | Reza BEHROUZ, Michel TORBEY                                                                                                                                                                                                                                                                                                                                                    |
|                                             | Co-Investigator(s)      | Karina CASTELLON LARIOS, Aixa ESPINOSA-MORALES, Bryan GOUGH, Diana GREENE-CHANDOS, Noah GROSE, Deepak GULATI, Omar HUSSEIN, Mahmoud Attia Mohamed KASSEM, Shraddha MAINALI, Stephen MARJORIBANKS, Chad MILLER, Mark MOSELEY, Alex PERCHUK, Juan PORTILLO, Fabrizio SACCHET, Andrew SLIVKA, Alberto URIBE                                                                       |
|                                             | Study Coordinator(s)    | Julie AGRIESTI, Laura BUCHWALDER, Sarah KOCH, Areej TARIQ                                                                                                                                                                                                                                                                                                                      |
| Palmetto Health Richland                    | Principal Investigator  | Souvik SEN                                                                                                                                                                                                                                                                                                                                                                     |
|                                             | Co-Investigator(s)      | Xiao Michelle ANDROULAKIS, Tom FABER, Bill GERARD, David HAMMETT, Priyantha HERATH, Te-Long HWANG, Sonal MEHTA, Davit MRELASHVILI, Paisith PIRIYAWAT, James SELPH, Swamy VENKATESH                                                                                                                                                                                             |
|                                             | Study Coordinator(s)    | Kyrra HALL, Evelyn KENNEDY, Shelley LAIRD                                                                                                                                                                                                                                                                                                                                      |
| Park Nicollet Methodist Hospital            | Principal Investigators | John DAVENPORT, Matthew OSTRANDER                                                                                                                                                                                                                                                                                                                                              |
|                                             | Co-Investigator(s)      | Krista MELVIN                                                                                                                                                                                                                                                                                                                                                                  |
|                                             | Study Coordinator(s)    | Dianna MARTIN                                                                                                                                                                                                                                                                                                                                                                  |
| Parkland Hospital                           | Principal Investigator  | Mark JOHNSON                                                                                                                                                                                                                                                                                                                                                                   |
|                                             | Co-Investigator(s)      | Mark ALBERTS, Chirantan BANERJEE, Paul HANSEN, Yathish HARALUR SREEKANTAIHAH, Rashedul HASAN, Jessica LEE, Alejandro MAGADAN, Tami SALAHUDDIN, Ty SHANG, Fazeel SIDDIQUI, Worthy WARNACK                                                                                                                                                                                       |
|                                             | Study Coordinator(s)    | Jan CAMERON-WATTS, Naomie GATHUA                                                                                                                                                                                                                                                                                                                                               |

|                                         |                      |                                                                                                                                                                                                                                                                                                |
|-----------------------------------------|----------------------|------------------------------------------------------------------------------------------------------------------------------------------------------------------------------------------------------------------------------------------------------------------------------------------------|
| Parkview<br>Regional<br>Medical Center  | Principal            | Fen-Lei CHANG                                                                                                                                                                                                                                                                                  |
|                                         | Investigator         |                                                                                                                                                                                                                                                                                                |
|                                         | Co-Investigator(s)   | Ahmed AL HAMDA, Thomas BANAS, Madhav BHAT, Marlene BULTEMEYER, TJ CURFMAN, Ajay GUPTA, Atiya KHAN, Jessica KNIRK, Paul LATER, Nils MUELLER-KRONAST, James STEVENS                                                                                                                              |
|                                         | Study Coordinator(s) | Sue BUDZON, Jeanne CAROL                                                                                                                                                                                                                                                                       |
| Penn<br>Presbyterian<br>Medical Center  | Principal            | Brett CUCCHIARA                                                                                                                                                                                                                                                                                |
|                                         | Investigator         |                                                                                                                                                                                                                                                                                                |
|                                         | Co-Investigator(s)   | Jill BAREN, Christina BLUM, Maria CHEN, Christopher FAVILLA, Kimberly GANNON, Judy JIA, Scott KASNER, Sami KHELLA, Donna KUROWSKI, Ava LIBERMAN, Caitlin LOOMIS, Jean LUCIANO, Michael MCGARVEY, Steven MESSE, Michael MULLEN, Claude NGUYEN, Laura STEIN, Jose TORRES, Ali ZANDIEH, Cen ZHANG |
|                                         | Study Coordinator(s) | Mary Elizabeth DESANTO                                                                                                                                                                                                                                                                         |
| Penn State<br>Hershey<br>Medical Center | Principal            | Raymond REICHWEIN                                                                                                                                                                                                                                                                              |
|                                         | Investigator         |                                                                                                                                                                                                                                                                                                |
|                                         | Co-Investigator(s)   | Natalie AUCUTT-WALTER, Kerstin BETTERMANN, Mohammad EL-GHANEM, Prabhu EMMADY, David ERMAK, Michelle FISCHER, Kevin GARDNER, David GOOD, Muhammad IBRAHIMI, James LEAMING                                                                                                                       |
|                                         | Study Coordinator(s) | Kimbra HITZ                                                                                                                                                                                                                                                                                    |
| Pennsylvania<br>Hospital                | Principal            | Brett CUCCHIARA, Christopher REES                                                                                                                                                                                                                                                              |
|                                         | Investigators        |                                                                                                                                                                                                                                                                                                |
|                                         | Co-Investigator(s)   | Jill BAREN, Christopher FAVILLA, Kimberly GANNON, Judy JIA, Scott KASNER, Donna KUROWSKI, Ava LIBERMAN, Jean LUCIANO, Michael MCGARVEY, Ellen MCPARTLAND-MONGIORI, Steven MESSE, Michael MULLEN, Claude NGUYEN, Paul NOVELLO, Laura STEIN, Ali ZANDIEH, Cen ZHANG                              |
|                                         | Study Coordinator(s) | Mary Elizabeth DESANTO, Scott DROBNIS                                                                                                                                                                                                                                                          |
| Portland VA<br>Medical Center           | Principal            | Helmi LUTSEP                                                                                                                                                                                                                                                                                   |
|                                         | Investigator         |                                                                                                                                                                                                                                                                                                |
|                                         | Co-Investigator(s)   | Hormozd BOZORGCHAMI, Wayne CLARK, Sierra FORD, Kory HERRICK, David HOAK, Olajide OLOGUNTOYE, Courtney TAKAHASHI, Craig WARDEN, Stewart WEBER                                                                                                                                                   |
|                                         | Study Coordinator(s) | Jonathan FOLEY                                                                                                                                                                                                                                                                                 |
|                                         | Principal            | Aamir BADRUDDIN                                                                                                                                                                                                                                                                                |
|                                         | Investigator         |                                                                                                                                                                                                                                                                                                |

|                                        |                        |                                                                                                                                                                                                                                                                                                                                                                |
|----------------------------------------|------------------------|----------------------------------------------------------------------------------------------------------------------------------------------------------------------------------------------------------------------------------------------------------------------------------------------------------------------------------------------------------------|
| Presence Saint Joseph Medical Center   | Co-Investigator(s)     | Kaiz ASIF, Sherman CHEN, Jennifer JOHANSEN, Dhru PANDYA                                                                                                                                                                                                                                                                                                        |
|                                        | Study Coordinator(s)   | Lynn MCLENNAN, Laura PAGANESSI                                                                                                                                                                                                                                                                                                                                 |
| Providence Portland Medical Center     | Principal Investigator | Amit KANSARA, Helmi LUTSEP                                                                                                                                                                                                                                                                                                                                     |
|                                        | Co-Investigator(s)     | Cheri BELLING, Archit BHATT, Hormozd BOZORGCHAMI, Cesar David CACERES, Diane CLARK, Wayne CLARK, Sandy DANCER, Amandeep DHILLON, Braidon FREEMAN, Lilith JUDD, Seth KAREUS, Theodore LOWENKOPF, Bethany MCCLENATHAN, Logan MCDANELD, Paula PRINCE, John ROBISON, Andrew RONTAL, Tomoko SAMPSON, Biggya SAPKOTA, Tanya SCHEIBE-MIREK, Lisa YANASE, John ZURASKY |
|                                        | Study Coordinator(s)   | Kelly FEEST, Jonathan FOLEY, Emily JOHNSON, Darren LARSEN, Kali SEISLER, Alexis YOUNG, Courtney ZERIZEF                                                                                                                                                                                                                                                        |
| Providence Sacred Heart Medical Center | Principal Investigator | Madeleine GERAGHTY                                                                                                                                                                                                                                                                                                                                             |
|                                        | Co-Investigator(s)     | Kathryn AL-HAFIAN, Esther RAWNER                                                                                                                                                                                                                                                                                                                               |
|                                        | Study Coordinator(s)   | Beth AARON, Truman CANTRELL                                                                                                                                                                                                                                                                                                                                    |
| Providence St. Vincent Medical Center  | Principal Investigator | Amit KANSARA, Helmi LUTSEP                                                                                                                                                                                                                                                                                                                                     |
|                                        | Co-Investigator(s)     | Cheri BELLING, Archit BHATT, Hormozd BOZORGCHAMI, Cesar David CACERES, Diane CLARK, Wayne CLARK, Sandy DANCER, Amandeep DHILLON, Braidon FREEMAN, Lilith JUDD, Seth KAREUS, Theodore LOWENKOPF, Bethany MCCLENATHAN, Logan MCDANELD, Paula PRINCE, John ROBISON, Andrew RONTAL, Tomoko SAMPSON, Biggya SAPKOTA, Tanya SCHEIBE-MIREK, Lisa YANASE, John ZURASKY |
|                                        | Study Coordinator(s)   | Kelly FEEST, Jonathan FOLEY, Emily JOHNSON, Darren LARSEN, Kali SEISLER, Alexis YOUNG, Courtney ZERIZEF                                                                                                                                                                                                                                                        |
| Regional Medical Center of San Jose    | Principal Investigator | Raul GUISADO, Raj GUPTA                                                                                                                                                                                                                                                                                                                                        |
|                                        | Co-Investigator(s)     | Jenelle JINDAL, James QUINN, Akshay SHAH                                                                                                                                                                                                                                                                                                                       |
|                                        | Study Coordinator(s)   | Christine KELLER                                                                                                                                                                                                                                                                                                                                               |
| Regions Hospital                       | Principal Investigator | Aaron BURNETT                                                                                                                                                                                                                                                                                                                                                  |
|                                        | Co-Investigator(s)     | Michelle BIROS, Mustapha EZZEDDINE, Vivian FINK, Bret HAAKE, Kurt ISENBERGER, Josh SALZMAN, Michael ZWANK                                                                                                                                                                                                                                                      |

|                                         |                         |                                                                                                                                                                                                                         |
|-----------------------------------------|-------------------------|-------------------------------------------------------------------------------------------------------------------------------------------------------------------------------------------------------------------------|
|                                         | Study Coordinator(s)    | Kari KRAGNESS, Emily MISCHEL-ABRAMOWSKI, Alyssa MORRIS, Sandi WEWERKA                                                                                                                                                   |
| Renown Regional Medical Center          | Principal Investigator  | Ivan LOPEZ                                                                                                                                                                                                              |
|                                         | Study Coordinator(s)    | Peggie SMITH                                                                                                                                                                                                            |
| Rhode Island Hospital                   | Principal Investigators | Brian SILVER, Shadi YAGHI                                                                                                                                                                                               |
|                                         | Co-Investigator(s)      | Jill BAREN, Brett CUCCHIARA, Shawna CUTTING, Lindsey FULLER, Muhib KHAN, Lisa MERCK, Lori OLIVER, Ali SAAD, Jo-Ann                                                                                                      |
|                                         | Study Coordinator(s)    | Karina BERTSCH, Lesley D'URSO (Wasilewski), Ashley SCHOMER                                                                                                                                                              |
| Ridgeview Medical Center                | Principal Investigator  | David LARSON                                                                                                                                                                                                            |
|                                         | Co-Investigator(s)      | Kevin BROWN, Mustapha EZZEDDINE                                                                                                                                                                                         |
|                                         | Study Coordinator(s)    | Brenda ANDERSON, Jane ARCHER, Kathleen MILLER, Mindy RUMBOLZ                                                                                                                                                            |
| Robert Wood Johnson University Hospital | Principal Investigators | James MCKINNEY, Deviyani MEHTA                                                                                                                                                                                          |
|                                         | Co-Investigator(s)      | Catherine ALBRECHT, Jill BAREN, Brett CUCCHIARA, Subasini DASH, Robert EISENSTEIN, Raffi KAPITANYAN, Jonathan MCCOY, Mark MERLIN, Michelle MOCCIO, Ugo PAOLUCCI, Igor RYBINNIK, Chirag SHAH, Patricia SONSALLA, Win TOE |
| Rochester General Hospital              | Principal Investigators | Scott BURGIN, Kelly MATMATI                                                                                                                                                                                             |
|                                         | Co-Investigator(s)      | Jeffrey BURDETTE, Candice JOB, Tammy MAHER, Celia MCINTOSH, Lawrence SAMKOFF, Kathleen SCHINDLER                                                                                                                        |
|                                         | Study Coordinator(s)    | Cheryl WEBER                                                                                                                                                                                                            |
|                                         | Principal Investigator  | Sidney STARKMAN                                                                                                                                                                                                         |



|                                         |                                                                         |                                                                                                                                                                                                                                                                                                                                                                                                                                                                                                                                                                                  |
|-----------------------------------------|-------------------------------------------------------------------------|----------------------------------------------------------------------------------------------------------------------------------------------------------------------------------------------------------------------------------------------------------------------------------------------------------------------------------------------------------------------------------------------------------------------------------------------------------------------------------------------------------------------------------------------------------------------------------|
| Ronald Reagan<br>UCLA Medical<br>Center | Co-Investigator(s)                                                      | Linda ABCEDE, Peter ADAMCZYK, Allison ARCH, Mersedeh BAHRHOSSEINI, Mateo CALDERON-ARNULPHI, Arun CHHABRA, Chuan Frances FAN ,Lindsey FRISCHMANN, Nathan GAINES, Jason HINMAN, Josephine HUANG, Doojin KIM, Conrad LIANG, David LIEBESKIND, Konark MALHOTRA, Neil MALUSTE, Michael MCMANUS, Royya MODIR, Kwan NG, Alireza NOORIAN, May NOUR, Bruce OVBIAGELE, Lucas RAMIREZ, Neal RAO, Rado RAYCHEV, Melissa REIDER-DEMER, Jeffrey SAVER, Latisha SHARMA, Sunil SHETH, Parampreet SINGH, Sarah SONG, XianNan TANG, Aaron TANSY, Jason TARPLEY, Anita TIPIRNENI, Anil YALLAPRAGADA |
|                                         | Study Coordinator(s)                                                    | Ileana GRUNBERG, Judy GUZY                                                                                                                                                                                                                                                                                                                                                                                                                                                                                                                                                       |
| Rush<br>University<br>Medical Center    | Principal<br>Investigator<br>Co-Investigator(s)                         | James CONNERS<br><br>Fatmah AL-ZAHAMI, Tom AUFDERHEIDE, Laurel CHERIAN (SMIT), Shawna CUTTING, Rima DAFER, Kathryn ESS, Vivien LEE, Jamal MUTHANA, Nicholas OSTERAAS, Jordan SAMUELS, Nader SAWIRIS, Bilaal SIRDAR, Sarah SONG, Alejandro VARGAS                                                                                                                                                                                                                                                                                                                                 |
|                                         | Study Coordinator(s)                                                    | Stephanie DAHL, Tiffany SINGSON                                                                                                                                                                                                                                                                                                                                                                                                                                                                                                                                                  |
| Saint Barnabas<br>Medical Center        | Principal<br>Investigators                                              | Danielle HASKINS, Deviyani MEHTA                                                                                                                                                                                                                                                                                                                                                                                                                                                                                                                                                 |
|                                         | Study Coordinator(s)                                                    | Kelly ROE                                                                                                                                                                                                                                                                                                                                                                                                                                                                                                                                                                        |
| Saint Thomas<br>West Hospital           | Principal<br>Investigator<br>Co-Investigator(s)                         | Michael KAMINSKI<br><br>Robert FALLIS, James FLEMING, Frank LAFRANCHISE, Subir PRASAD, Timothy UPCHURCH                                                                                                                                                                                                                                                                                                                                                                                                                                                                          |
|                                         | Study Coordinator(s)                                                    | Diana COMAN, Marie PAYNE                                                                                                                                                                                                                                                                                                                                                                                                                                                                                                                                                         |
| San Antonio<br>Community<br>Hospital    | Principal<br>Investigator<br>Co-Investigator(s)<br>Study Coordinator(s) | Faisal QAZI<br><br>James ROSENTHAL<br>Satish SOOD                                                                                                                                                                                                                                                                                                                                                                                                                                                                                                                                |
|                                         | Principal<br>Investigator                                               | Claude HEMPHILL                                                                                                                                                                                                                                                                                                                                                                                                                                                                                                                                                                  |

|                                  |                        |                                                                                                                                                                                                                                                                                                                                                                                                                                                                                                                                                                                                                                                                                                                                                  |
|----------------------------------|------------------------|--------------------------------------------------------------------------------------------------------------------------------------------------------------------------------------------------------------------------------------------------------------------------------------------------------------------------------------------------------------------------------------------------------------------------------------------------------------------------------------------------------------------------------------------------------------------------------------------------------------------------------------------------------------------------------------------------------------------------------------------------|
| San Francisco General Hospital   | Co-Investigator(s)     | Ahmad AHMAD, Aimee AYSENNE, John BETJEMANN, Molly BURNETT, Tamika BURRUS, Elizabeth CAHILL, Sheila CHAN, Judy CHANG, Natalie CHENG, Roger CHENG, Rene COLORADO, Vanja DOUGLAS, Julia DURRANT, Nancy EDWARDS, Christine FOX, Alan GELB, Trevor GREGATH, Cathra HALABI, Karen HIRSCH, Andrew JOSEPHSON, Hooman KAMEL, Kevin KEENAN, Anthony KIM, Nerissa KO, Mohan KOTTAPALLY, Karl MEISEL, Asma MOHEET, Arturo MONTANO, Kazuma NAKAGAWA, Bharath NARAVETLA, Babak NAVI, Anh NGUYEN, Mai NGUYEN-HUYNH, Sharon POISSON, Prasanthi RAMANUJAM, Nirav SHAH, Michel SHAMY, Kevin SHAPIRO, Peyman SHIRANI, Vineeta SINGH, Neel SINGHAL, Wade SMITH, Karl SPORER, Abraham THOMAS, Shahed TOOSI, Christine WONG, Alan YEE, Debbie YI MADHOK, QingYang YUAN |
|                                  | Study Coordinator(s)   | Jun LAUDER, Michele MEEKER, Dominica RANDAZZO, Kelley ROSBOROUGH                                                                                                                                                                                                                                                                                                                                                                                                                                                                                                                                                                                                                                                                                 |
| Sarasota Memorial Hospital       | Principal Investigator | Mauricio CONCHA                                                                                                                                                                                                                                                                                                                                                                                                                                                                                                                                                                                                                                                                                                                                  |
|                                  | Co-Investigator(s)     | Julio CANTERO, Kyle RUFFING, Leonie VAN PASSEL                                                                                                                                                                                                                                                                                                                                                                                                                                                                                                                                                                                                                                                                                                   |
|                                  | Study Coordinator(s)   | Jeanette WILSON                                                                                                                                                                                                                                                                                                                                                                                                                                                                                                                                                                                                                                                                                                                                  |
| Scripps Mercy Hospital San Diego | Principal Investigator | Royya MODIR                                                                                                                                                                                                                                                                                                                                                                                                                                                                                                                                                                                                                                                                                                                                      |
|                                  | Co-Investigator(s)     | Kunal AGRAWAL, Maysun ALI, Kevin ATTENHOFER, Robert CLAYCOMB, Thomas HEMMEN, Nabeel HERIAL, James HO, Branko HUISA, Abhishek LUNAGARIYA, Brett MEYER, Dawn MEYER, Rajiv NARULA, David NGUYEN, Lindsay OLSON-MACK, Mohsen PIRASTEHFAR, Hami RAMANI, Belma SADIKOVIC, Konrad SCHLICK, Pradeep SELVAN, Gilda TAFRESHI                                                                                                                                                                                                                                                                                                                                                                                                                               |
|                                  | Study Coordinator(s)   | Brittney LEHMANN, Karen RAPP, Kathleen RICKES, Kristin WOODS                                                                                                                                                                                                                                                                                                                                                                                                                                                                                                                                                                                                                                                                                     |
| Sentara Norfolk General Hospital | Principal Investigator | Richard ZWEIFLER                                                                                                                                                                                                                                                                                                                                                                                                                                                                                                                                                                                                                                                                                                                                 |
|                                  | Co-Investigator(s)     | Pamela EVANS, Bruce LO, Renee-Scott WALKER                                                                                                                                                                                                                                                                                                                                                                                                                                                                                                                                                                                                                                                                                                       |
|                                  | Study Coordinator(s)   | Samantha BRIGHT, Stacey CUMMINGS, Pam HOLLSTEN, Ana ROLDAN                                                                                                                                                                                                                                                                                                                                                                                                                                                                                                                                                                                                                                                                                       |
| Seton Medical Center             | Principal Investigator | TJ MILLING                                                                                                                                                                                                                                                                                                                                                                                                                                                                                                                                                                                                                                                                                                                                       |

|                                                      |                         |                                                                                                                                                                                                                                                                                                                                                                                                                                                                                          |
|------------------------------------------------------|-------------------------|------------------------------------------------------------------------------------------------------------------------------------------------------------------------------------------------------------------------------------------------------------------------------------------------------------------------------------------------------------------------------------------------------------------------------------------------------------------------------------------|
|                                                      | Co-Investigator(s)      | Atheer AHMED BALDAWI, John BEDOLLA, John BERTELSON, Ray BOGITCH, Pat CROCKER, Lisa DAVIS, Ming DING, Kent ELLINGTON, Jessica ERFAN, Clifford Jack FRAIM, Jeffrey HENDERSON, Eric HIGGINBOTHAM, Tameem HUSAIN, Elizabeth JONES, Jefferson MILEY, Johanna MORTON, Todd NASH, Sarah OLSTYN, Sohan PAREKH, Osvaldo PERURENA, Brian PRICE, Sheldon ROCKWOOD, Sara SCOTT, Jason SHEN, Kristen SMOLIK, Christopher TOPEL, Steven WARACH, Walter WERCHAN, Robert WESTON, Ira WOOD, Chris ZIEBELL |
|                                                      | Study Coordinator(s)    | Sheree ADAMS, Kristen KIMMERLE, Laura LACHANCE                                                                                                                                                                                                                                                                                                                                                                                                                                           |
| Sinai-Grace Hospital                                 | Principal Investigators | Anthony LAGINA, Claire PEARSON                                                                                                                                                                                                                                                                                                                                                                                                                                                           |
|                                                      | Co-Investigator(s)      | Benjamin ATKINSON, Pratik BHATTACHARYA, Seemant CHATURVEDI, Angela GROVES, Amit KANSARA, Phillip LEVY, Ramesh MADHAVAN, Wazim MOHAMED, Meenakshi MUNSHI, Greg NORRIS, Brian O'NEIL, Kumar RAJAMANI, Robert SHERWIN, Kushak SUCHDEV, Ambooj TIWARI, Preet VARADE, Marc-Anthony VELILLA, Robert WELCH                                                                                                                                                                                      |
|                                                      | Study Coordinator(s)    | Farhan AYZAZ, Saikat BHUIYAN, Valerie MIKA                                                                                                                                                                                                                                                                                                                                                                                                                                               |
| Southern Illinois University Memorial Medical Center | Principal Investigator  | Fazeel SIDDIQUI                                                                                                                                                                                                                                                                                                                                                                                                                                                                          |
|                                                      | Co-Investigator(s)      | Tamer ABDELHAK, Nicole ATWOOD, Rodger ELBLE, Sushant KALE, Sajjad MUEED, Valeriy SABODASH, Amita SINGH, Zeng WANG                                                                                                                                                                                                                                                                                                                                                                        |
|                                                      | Study Coordinator(s)    | Sally FRITZ, Dolly KELLEY                                                                                                                                                                                                                                                                                                                                                                                                                                                                |
| Sparrow Hospital                                     | Principal Investigator  | Syed HUSSAIN                                                                                                                                                                                                                                                                                                                                                                                                                                                                             |
|                                                      | Co-Investigator(s)      | Vibhav BANSAL, Vishal JANI, Mounzer KASSAB, Malathi RAO, Anmar RAZAK, Gautam SACHDEVA, Adan SAFDAR                                                                                                                                                                                                                                                                                                                                                                                       |
|                                                      | Study Coordinator(s)    | Erin SHELL                                                                                                                                                                                                                                                                                                                                                                                                                                                                               |
| Spectrum Health Hospitals - Butterworth              | Principal Investigator  | John OOSTEMA (Adam)                                                                                                                                                                                                                                                                                                                                                                                                                                                                      |
|                                                      | Co-Investigator(s)      | Michael BROWN, Jeffrey JONES, Joshua REYNOLDS                                                                                                                                                                                                                                                                                                                                                                                                                                            |
|                                                      | Study Coordinator(s)    | Tiffany FLEEGER                                                                                                                                                                                                                                                                                                                                                                                                                                                                          |
| St. Anthony Hospital                                 | Principal Investigator  | Mark MURRAY                                                                                                                                                                                                                                                                                                                                                                                                                                                                              |
|                                                      | Co-Investigator(s)      | Christy CASPER, Bill COPLIN, Alex GRAVES, Rick SMITH                                                                                                                                                                                                                                                                                                                                                                                                                                     |

|                                          |                            |                                                                                                                                                                                                                                                                                                                                                                                                                                                                                                                                                                                                                                                                                        |
|------------------------------------------|----------------------------|----------------------------------------------------------------------------------------------------------------------------------------------------------------------------------------------------------------------------------------------------------------------------------------------------------------------------------------------------------------------------------------------------------------------------------------------------------------------------------------------------------------------------------------------------------------------------------------------------------------------------------------------------------------------------------------|
|                                          | Study Coordinator(s)       | Sheryl GIAMBARTOLOMEI                                                                                                                                                                                                                                                                                                                                                                                                                                                                                                                                                                                                                                                                  |
| St. David's<br>Medical Center            | Principal<br>Investigators | Kent ELLINGTON, Johanna MORTON, Angel<br>PULIDO, James WALDRON                                                                                                                                                                                                                                                                                                                                                                                                                                                                                                                                                                                                                         |
|                                          | Co-Investigator(s)         | Hana AUBRECHTOVA, Ray BOGITCH, Elizabeth<br>CARROLL, Albert HORN, David MORLEDGE                                                                                                                                                                                                                                                                                                                                                                                                                                                                                                                                                                                                       |
|                                          | Study Coordinator(s)       | Sergio AVILA-MICHEL, Kaelyn KAPPELER,<br>Karissa MORTON                                                                                                                                                                                                                                                                                                                                                                                                                                                                                                                                                                                                                                |
| St. Elizabeth<br>Hospital                | Principal<br>Investigators | Rahul KARAMCHANDANI, Kyle WALSH                                                                                                                                                                                                                                                                                                                                                                                                                                                                                                                                                                                                                                                        |
|                                          | Co-Investigator(s)         | Opeolu ADEOYE, Jordan BONOMO, Joseph<br>BRODERICK, Rhonda CADENA, Elisheva<br>COLEMAN, Felipe DE LOS RIOS LA ROSA,<br>Stacie DEMEL, Bryan ECKERLE, Simona<br>FERIOLI, Matthew FLAHERTY, Rachel GARVIN,<br>Anna GENSIC, Sabreena GILLOW, Aaron<br>GROSSMAN, Jonah GROSSMAN, Laura<br>HEITSCH, Adam JASNE, Daniel KANTER, Brian<br>KATZ, Pooja KHATRI, Brett KISSELA, Dawn<br>KLEINDORFER, William KNIGHT, Natalie<br>KREITZER, Julian MACEDO, Jason MACKKEY,<br>Sharyl MARTINI, Erin MCDONOUGH, Meena<br>MUNSHI, Brian OLOIZIA, Art PANCIOLI, Katrina<br>PEARISO, Jonathan RATCLIFF, Sameer<br>SHARMA, Blake SMITH, Michael STAR, Brian<br>STETTLER, Daniel WOO, Muhammad<br>ZAGHLOULEH |
|                                          | Study Coordinator(s)       | Shannon DEEDS, Sara KEEGAN                                                                                                                                                                                                                                                                                                                                                                                                                                                                                                                                                                                                                                                             |
| St. Elizabeth<br>Hospital Fort<br>Thomas | Principal<br>Investigators | Rahul KARAMCHANDANI, Kyle WALSH                                                                                                                                                                                                                                                                                                                                                                                                                                                                                                                                                                                                                                                        |
|                                          | Co-Investigator(s)         | Opeolu ADEOYE, Jordan BONOMO, Joseph<br>BRODERICK, Rhonda CADENA, Elisheva<br>COLEMAN, Felipe DE LOS RIOS LA ROSA,<br>Stacie DEMEL, Bryan ECKERLE, Simona<br>FERIOLI, Matthew FLAHERTY, Rachel GARVIN,<br>Anna GENSIC, Sabreena GILLOW, Aaron<br>GROSSMAN, Jonah GROSSMAN, Laura<br>HEITSCH, Adam JASNE, Daniel KANTER, Brian<br>KATZ, Pooja KHATRI, Brett KISSELA, Dawn<br>KLEINDORFER, William KNIGHT, Natalie<br>KREITZER, Julian MACEDO, Jason MACKKEY,<br>Sharyl MARTINI, Erin MCDONOUGH, Meena<br>MUNSHI, Brian OLOIZIA, Art PANCIOLI, Katrina<br>PEARISO, Jonathan RATCLIFF, Sameer<br>SHARMA, Blake SMITH, Michael STAR, Brian<br>STETTLER, Daniel WOO, Muhammad<br>ZAGHLOULEH |
|                                          | Study Coordinator(s)       | Shannon DEEDS, Sara KEEGAN                                                                                                                                                                                                                                                                                                                                                                                                                                                                                                                                                                                                                                                             |

|                                            |                      |                                                                                                                                                                                                                                                                                                                                                                                                                                                                                                                                                                                                                                       |
|--------------------------------------------|----------------------|---------------------------------------------------------------------------------------------------------------------------------------------------------------------------------------------------------------------------------------------------------------------------------------------------------------------------------------------------------------------------------------------------------------------------------------------------------------------------------------------------------------------------------------------------------------------------------------------------------------------------------------|
|                                            | Study Coordinator(s) | Shannon DEEDS, Sara KEEGAN                                                                                                                                                                                                                                                                                                                                                                                                                                                                                                                                                                                                            |
| St. Elizabeth<br>Medical Center<br>South   | Principal            | Rahul KARAMCHANDANI, Kyle WALSH                                                                                                                                                                                                                                                                                                                                                                                                                                                                                                                                                                                                       |
|                                            | Investigators        |                                                                                                                                                                                                                                                                                                                                                                                                                                                                                                                                                                                                                                       |
|                                            | Co-Investigator(s)   | Opeolu ADEOYE, Jordan BONOMO, Joseph BRODERICK, Rhonda CADENA, Elisheva COLEMAN, Felipe DE LOS RIOS LA ROSA, Stacie DEMEL, Bryan ECKERLE, Simona FERIOLI, Matthew FLAHERTY, Rachel GARVIN, Anna GENSIC, Sabreena GILLOW, Aaron GROSSMAN, Jonah GROSSMAN, Laura HEITSCH, Adam JASNE, Daniel KANTER, Brian KATZ, Pooja KHATRI, Brett KISSELA, Dawn KLEINDORFER, William KNIGHT, Natalie KREITZER, Julian MACEDO, Jason MACKEY, Sharyl MARTINI, Erin MCDONOUGH, Meena MUNSHI, Brian OLOIZIA, Art PANCIOLI, Katrina PEARISO, Jonathan RATCLIFF, Sameer SHARMA, Blake SMITH, Michael STAR, Brian STETTLER, Daniel WOO, Muhammad ZAGHLOULEH |
|                                            | Study Coordinator(s) | Shannon DEEDS, Sara KEEGAN                                                                                                                                                                                                                                                                                                                                                                                                                                                                                                                                                                                                            |
| St. John<br>Hospital and<br>Medical Center | Principal            | Robert DUNNE, Claire PEARSON                                                                                                                                                                                                                                                                                                                                                                                                                                                                                                                                                                                                          |
|                                            | Investigators        |                                                                                                                                                                                                                                                                                                                                                                                                                                                                                                                                                                                                                                       |
|                                            | Co-Investigator(s)   | Elizabeth BASCOM, Paul CULLIS, Patricia NOUHAN, Margarita PENA, Makenzie THIMM, Robert WELCH, Michelle WIENER                                                                                                                                                                                                                                                                                                                                                                                                                                                                                                                         |
|                                            | Study Coordinator(s) | Lynne FROEHLICH                                                                                                                                                                                                                                                                                                                                                                                                                                                                                                                                                                                                                       |
| St. John's<br>Hospital                     | Principal            | Fazeel SIDDIQUI                                                                                                                                                                                                                                                                                                                                                                                                                                                                                                                                                                                                                       |
|                                            | Investigator         |                                                                                                                                                                                                                                                                                                                                                                                                                                                                                                                                                                                                                                       |
|                                            | Co-Investigator(s)   | Rodger ELBLE, Sushant KALE, Sajjad MUEED, Valeriy SABODASH, Amita SINGH, Zeng WANG                                                                                                                                                                                                                                                                                                                                                                                                                                                                                                                                                    |
|                                            | Study Coordinator(s) | Sally FRITZ, Dolly KELLEY                                                                                                                                                                                                                                                                                                                                                                                                                                                                                                                                                                                                             |
| St. Joseph<br>Regional<br>Health Center    | Principal            | Michael SPOHN                                                                                                                                                                                                                                                                                                                                                                                                                                                                                                                                                                                                                         |
|                                            | Investigator         |                                                                                                                                                                                                                                                                                                                                                                                                                                                                                                                                                                                                                                       |
|                                            | Co-Investigator(s)   | Derek CARAWAY, Paul GOEN, Brandon LEWIS, Michael MCDONALD, Kimberly OAS, Marcus PURVIS, Carmen RAMIREZ                                                                                                                                                                                                                                                                                                                                                                                                                                                                                                                                |
|                                            | Study Coordinator(s) | Debbie LEWIS, Donna WEBB                                                                                                                                                                                                                                                                                                                                                                                                                                                                                                                                                                                                              |
| St. Jude<br>Medical Center                 | Principal            | Stephen WALDMAN                                                                                                                                                                                                                                                                                                                                                                                                                                                                                                                                                                                                                       |
|                                            | Investigator         |                                                                                                                                                                                                                                                                                                                                                                                                                                                                                                                                                                                                                                       |
|                                            | Co-Investigator(s)   | Kiran BATH, Anthony CIABARRA, Johnson MOON                                                                                                                                                                                                                                                                                                                                                                                                                                                                                                                                                                                            |
|                                            | Study Coordinator(s) | Sheraz MOSSA                                                                                                                                                                                                                                                                                                                                                                                                                                                                                                                                                                                                                          |
|                                            | Principal            | Salvador CRUZ-FLORES                                                                                                                                                                                                                                                                                                                                                                                                                                                                                                                                                                                                                  |
|                                            | Investigator         |                                                                                                                                                                                                                                                                                                                                                                                                                                                                                                                                                                                                                                       |

|                                    |                        |                                                                                                                                                                                                                                                                                                                                                                                                                                                                                                                                                                                                   |
|------------------------------------|------------------------|---------------------------------------------------------------------------------------------------------------------------------------------------------------------------------------------------------------------------------------------------------------------------------------------------------------------------------------------------------------------------------------------------------------------------------------------------------------------------------------------------------------------------------------------------------------------------------------------------|
| St. Louis University Hospital      | Co-Investigator(s)     | Aninda ACHARYA, Amer ALSHEKHLEE, Charles CALLISON, Tagann CHAISAM, Randall EDGELL, Eli FEEN, Sushant KALE, Jacob KITCHENER, Sonal MEHTA, Paisith PIRIYAWAT, Nirav VORA                                                                                                                                                                                                                                                                                                                                                                                                                            |
|                                    | Study Coordinator(s)   | Susan BROWN, Eve HOLZEMER                                                                                                                                                                                                                                                                                                                                                                                                                                                                                                                                                                         |
| Stanford University Medical Center | Principal Investigator | Gregory ALBERS, Nirali VORA                                                                                                                                                                                                                                                                                                                                                                                                                                                                                                                                                                       |
|                                    | Co-Investigator(s)     | Pablo BRAVO, Marion BUCKWALTER, Charlene CHEN, Anna FINLEY-CAULFIELD, Paul GEORGE, Karen HIRSCH, Kyle HOBBS, Michael KE, Sun KIM, Prashanth KRISHNAMOHAN, Soo Young KWON, Maarten LANSBERG, Sarah LEE, Catherine LEGAULT, Adam MACLELLAN, Sharan MANN, Christina MIJALSKI, Gracia MUI, Jean-Marc OLIVOT, INDER PAUL SINGH, Reza PIRSAHELI, Divya PRABHU, Archana PURUSHOTHAM, James QUINN, Basit RAHIM, Adam RIZVI, Edgar SAMANIEGO, Neil SCHWARTZ, Christopher SOUTHWOOD, Ilanit SPOKOYNY, Waimei Amy TAI, Mohamed TELEB, Jenny TSAI, Christie TUNG, Chitra VENKATASUBRAMANIAN, Christine WIJMAN |
|                                    | Study Coordinator(s)   | Christine KELLER, Rosen MANN, Anita VISWESWARAN                                                                                                                                                                                                                                                                                                                                                                                                                                                                                                                                                   |
| Stony Brook University Hospital    | Principal Investigator | Ethan BRANDLER                                                                                                                                                                                                                                                                                                                                                                                                                                                                                                                                                                                    |
|                                    | Co-Investigator(s)     | Laura DONARUMMO, Michael GUIDO, Candice PERKINS, Galyna PUSHCHINSKA, Adam SINGER                                                                                                                                                                                                                                                                                                                                                                                                                                                                                                                  |
|                                    | Study Coordinator(s)   | Maria TAYLOR                                                                                                                                                                                                                                                                                                                                                                                                                                                                                                                                                                                      |
| Strong Memorial Hospital           | Principal Investigator | Adam KELLY, David REMPE                                                                                                                                                                                                                                                                                                                                                                                                                                                                                                                                                                           |
|                                    | Co-Investigator(s)     | Curtis BENESCH, Scott BURGIN, Ania BUSZA, Justin CHANDLER, Gaurav DIGHE, Fulvio GIL, Todd HOLMQUIST, Michael MANCHAK, Anthony NOTO, Jennifer RICHARD, Jorge RISCO, Bogachan SAHIN, Eugene SCHARF, Roople UNIA                                                                                                                                                                                                                                                                                                                                                                                     |
|                                    | Study Coordinator(s)   | Heather FINLEY, Dawn MARTIN                                                                                                                                                                                                                                                                                                                                                                                                                                                                                                                                                                       |
| Summa Akron City Hospital          | Principal Investigator | Susana BOWLING                                                                                                                                                                                                                                                                                                                                                                                                                                                                                                                                                                                    |
|                                    | Co-Investigator(s)     | Mary-Colleen BHALLA, Joao GOMES, Kristy JACOBSON, John KACHORIS, Kirk STIFFLER, Scott WILBER                                                                                                                                                                                                                                                                                                                                                                                                                                                                                                      |
|                                    | Study Coordinator(s)   | Kathy CUNNINGHAM, Rachelle SCHARSU, Patricia WOOD                                                                                                                                                                                                                                                                                                                                                                                                                                                                                                                                                 |

|                                 |                                                                           |                                                                                                                                                                                                                                                                                                                                                                                                                   |
|---------------------------------|---------------------------------------------------------------------------|-------------------------------------------------------------------------------------------------------------------------------------------------------------------------------------------------------------------------------------------------------------------------------------------------------------------------------------------------------------------------------------------------------------------|
| SUNY Downstate Medical Center   | Principal Investigators<br>Co-Investigator(s)<br><br>Study Coordinator(s) | Pia CHATTERJEE, Steven LEVINE, Adrian MARCHIDANN, Richard SINERT<br>Clotilde BALUCANI, Ethan BRANDLER, Qing HAO, Richard JACKSON, Yongwoo KIM, Susan LAW, Jennifer MARTINDALE, Jay MELTON, Lorenzo PALADINO, Diana ROJAS-SOTO, Artem SUNIK, Benedict TAN, Helen VALSAMIS, Volodymyr VULKANOV, Shahriar ZEHTABCHI<br>Vanessa ARNEDO, Nadege GILLES, Saroj KUNNAKKAT, Catherine LUSHBOUGH, Sarah WEINGAST (ZELONIS) |
| SUNY Upstate Medical University | Principal Investigator<br>Co-Investigator(s)<br><br>Study Coordinator(s)  | Julius-Gene LATORRE<br>Ahmad AHMAD, Sanam ANWER, Ilya BRAGIN, Elnour ELWALEED, Ziad EL-ZAMMAR, Anna Monica FERMIN, Shahnawaz KARIM, Michael MENDOZA, Mubashir PERVEZ, Wyssem RAMDANI, Rajbeer SANGHA, Elena SCHMIDT<br>Alisha HARTWELL, Muhammad IQBAL, Iulia MOVILEANU,                                                                                                                                          |
| Sutter Medical Center           | Principal Investigators<br>Co-Investigator(s)<br>Study Coordinator(s)     | Wendy BROWN, Mohammad-Asim MAHMOOD<br>Peter ADAMCZYK, Richard ATKINSON<br>Barbara WELCHER                                                                                                                                                                                                                                                                                                                         |
| Sutter Memorial Hospital        | Principal Investigator<br>Co-Investigator(s)<br>Study Coordinator(s)      | Wendy BROWN<br>Richard ATKINSON<br>Barbara WELCHER                                                                                                                                                                                                                                                                                                                                                                |
| Sutter Roseville Medical Center | Principal Investigators<br>Co-Investigator(s)<br>Study Coordinator(s)     | Wendy BROWN, Mohammad-Asim MAHMOOD<br>Richard ATKINSON<br>Teresa CARTER, Michele GUILLEN                                                                                                                                                                                                                                                                                                                          |
| Swedish Medical Center          | Principal Investigator<br>Co-Investigator(s)<br><br>Study Coordinator(s)  | Ira CHANG<br>Russell BARTT, Christian BURRELL, Christopher FANALE, Ananda FINE, Judd JENSEN, Emily LAMPE, Kathryn MCCARTHY (LEONARD), Amy NIEBERLEIN (LARSON), Robert PRATT, Stacy SHINE, Byron Rod SPENCER, Rebecca VANVLIET, Jeffrey WAGNER, Adrienne WALSH, Michelle WHALEY<br>Paula FISK, Tyler IRANI, Lenden NEEPER, Alicia NOVAK, Jeanne SWANSON                                                            |
|                                 | Principal Investigator                                                    | Nina GENTILE                                                                                                                                                                                                                                                                                                                                                                                                      |

|                                           |                         |                                                                                                                                                                                                                                                                                                                                                                                                                                                                                                                                                                                                                                                                    |
|-------------------------------------------|-------------------------|--------------------------------------------------------------------------------------------------------------------------------------------------------------------------------------------------------------------------------------------------------------------------------------------------------------------------------------------------------------------------------------------------------------------------------------------------------------------------------------------------------------------------------------------------------------------------------------------------------------------------------------------------------------------|
| Temple University Hospital                | Co-Investigator(s)      | Derek ISENBERG, Mercedes JACOBSON, Paul KATZ, Yongwoo KIM, Tim LACHMAN, Guillermo LINARES, Imama NAQVI                                                                                                                                                                                                                                                                                                                                                                                                                                                                                                                                                             |
|                                           | Study Coordinator(s)    | Patricia MCNELIS, Hannah REIMER                                                                                                                                                                                                                                                                                                                                                                                                                                                                                                                                                                                                                                    |
| Texas Health Presbyterian Hospital Dallas | Principal Investigator  | Samir SHAH                                                                                                                                                                                                                                                                                                                                                                                                                                                                                                                                                                                                                                                         |
|                                           | Co-Investigator(s)      | Nicholas ABSALOM, Karen SACKS                                                                                                                                                                                                                                                                                                                                                                                                                                                                                                                                                                                                                                      |
|                                           | Study Coordinator(s)    | Shelley LONG, Michelle MORGAN                                                                                                                                                                                                                                                                                                                                                                                                                                                                                                                                                                                                                                      |
| The Jewish Hospital                       | Principal Investigators | Rahul KARAMCHANDANI, Kyle WALSH                                                                                                                                                                                                                                                                                                                                                                                                                                                                                                                                                                                                                                    |
|                                           | Co-Investigator(s)      | Opeolu ADEOYE, Jordan BONOMO, Joseph BRODERICK, Rhonda CADENA, Elisheva COLEMAN, Felipe DE LOS RIOS LA ROSA, Stacie DEMEL, Bryan ECKERLE, Simona FERIOLI, Matthew FLAHERTY, Rachel GARVIN, Anna GENSIC, Sabreena GILLOW, Aaron GROSSMAN, Jonah GROSSMAN, Laura HEITSCH, Adam JASNE, Daniel KANTER, Brian KATZ, Pooja KHATRI, Charles KIRCHER, Brett KISSELA, Dawn KLEINDORFER, William KNIGHT, Natalie KREITZER, Julian MACEDO, Jason MACKEY, Sharyl MARTINI, Erin MCDONOUGH, Eva MISTRY, Meena MUNSHI, Brian OLOIZIA, Art PANCIOLI, Katrina PEARISO, Jonathan RATCLIFF, Sameer SHARMA, Blake SMITH, Michael STAR, Brian STETTLER, Daniel WOO, Muhammad ZAGHLOULEH |
|                                           | Study Coordinator(s)    | Shannon DEEDS, Sara KEEGAN                                                                                                                                                                                                                                                                                                                                                                                                                                                                                                                                                                                                                                         |
| The Mount Sinai Hospital                  | Principal Investigator  | Jesse WEINBERGER                                                                                                                                                                                                                                                                                                                                                                                                                                                                                                                                                                                                                                                   |
|                                           | Co-Investigator(s)      | Yu-Feng-Yvonne CHAN, Deborah HOROWITZ, Frank KIM, Aviva LUBIN, Kara SHEINART, Stanley TUHRIM, Qingliang WANG                                                                                                                                                                                                                                                                                                                                                                                                                                                                                                                                                       |
|                                           | Study Coordinator(s)    | Sandra AUGUSTINE                                                                                                                                                                                                                                                                                                                                                                                                                                                                                                                                                                                                                                                   |
| The Queen's Medical Center                | Principal Investigators | Douglas FRANZ, Rony SALEM, Douglas VALENTA                                                                                                                                                                                                                                                                                                                                                                                                                                                                                                                                                                                                                         |
|                                           | Co-Investigator(s)      | Cherylee CHANG, Matthew KOENIG, Garson LEE, Jeffery-Doug MILES, Kazuma NAKAGAWA                                                                                                                                                                                                                                                                                                                                                                                                                                                                                                                                                                                    |
|                                           | Study Coordinator(s)    | Lyle OSHITA, Tracy STERN                                                                                                                                                                                                                                                                                                                                                                                                                                                                                                                                                                                                                                           |
| Thomas Jefferson                          | Principal Investigator  | AnnaMarie CHANG                                                                                                                                                                                                                                                                                                                                                                                                                                                                                                                                                                                                                                                    |



|                                                   |                        |                                                                                                                                                                                                                                                                                                                                                                                                           |
|---------------------------------------------------|------------------------|-----------------------------------------------------------------------------------------------------------------------------------------------------------------------------------------------------------------------------------------------------------------------------------------------------------------------------------------------------------------------------------------------------------|
| University<br>Hospital                            | Co-Investigator(s)     | Norman AJIBOYE, Sanjay ANANDARAM, Rodney BELL, Lisa BOWMAN, Shruti CHANDRA, Nina GENTILE, Jack JALLO, William MCBRIDE, Michael MOUSSOUTTAS, Maria Carissa PINEDA, Pranoti PRADHAN, Ray REGAN, Fred RINCON, Diana TZENG, Jacqueline URTECHO, Matthew VIBBERT, Jennifer WHITE, Sridhara YADDANAPUDI                                                                                                         |
|                                                   | Study Coordinator(s)   | Amanda FURLONG-SALVATORE, Jennifer GLENDENING, Nicole RENZI, Kiriaki SERENIDIS, Meghan-Patricia WAKEFIELD, Melissa WITT                                                                                                                                                                                                                                                                                   |
| UC Davis<br>Medical Center                        | Principal Investigator | Daniel NISHIJIMA                                                                                                                                                                                                                                                                                                                                                                                          |
|                                                   | Co-Investigator(s)     | Glen JICKLING, Kwan NG                                                                                                                                                                                                                                                                                                                                                                                    |
|                                                   | Study Coordinator(s)   | Michaela CANOVA                                                                                                                                                                                                                                                                                                                                                                                           |
| UCSD Health<br>La Jolla                           | Principal Investigator | Dawn MEYER                                                                                                                                                                                                                                                                                                                                                                                                |
|                                                   | Co-Investigator(s)     | Kunal AGRAWAL, Maysun ALI, Kevin ATTENHOFER, Nhu BRUCE, Jessica CHOE, Robert CLAYCOMB, Amy GUZIK, Lovella HAILEY, Thomas HEMMEN, Nabeel HERIAL, James HO, Branko HUISA, Kiet LOC, Abhishek LUNAGARIYA, Brett MEYER, Royya MODIR, Melissa MORTIN, Rajiv NARULA, William NEIL, David NGUYEN, Bruce OVBIAGELE, Mohsen PIRASTEHFAR, Hami RAMANI, Belma SADIKOVIC, Konrad SCHLICK, Pradeep SELVAN, Ajeet SODHI |
|                                                   | Study Coordinator(s)   | Nancy KELLY, Brittney LEHMANN, Karen RAPP, Kathleen RICKES, Kristin WOODS                                                                                                                                                                                                                                                                                                                                 |
| UCSD Medical<br>Center -<br>Hillcrest<br>Hospital | Principal Investigator | Dawn MEYER                                                                                                                                                                                                                                                                                                                                                                                                |
|                                                   | Co-Investigator(s)     | Kunal AGRAWAL, Maysun ALI, Kevin ATTENHOFER, Nhu BRUCE, Jessica CHOE, Robert CLAYCOMB, Amy GUZIK, Lovella HAILEY, Thomas HEMMEN, Nabeel HERIAL, James HO, Branko HUISA, Kiet LOC, Abhishek LUNAGARIYA, Brett MEYER, Royya MODIR, Melissa MORTIN, Rajiv NARULA, William NEIL, David NGUYEN, Bruce OVBIAGELE, Mohsen PIRASTEHFAR, Hami RAMANI, Belma SADIKOVIC, Konrad SCHLICK, Pradeep SELVAN, Ajeet SODHI |
|                                                   | Study Coordinator(s)   | Nancy KELLY, Brittney LEHMANN, Karen RAPP, Kathleen RICKES, Kristin WOODS                                                                                                                                                                                                                                                                                                                                 |

|                           |                        |                                                                                                                                                                                                                                                                                                                                                                                                                                                                                                                                                                                                                                                                                                                                                                                               |
|---------------------------|------------------------|-----------------------------------------------------------------------------------------------------------------------------------------------------------------------------------------------------------------------------------------------------------------------------------------------------------------------------------------------------------------------------------------------------------------------------------------------------------------------------------------------------------------------------------------------------------------------------------------------------------------------------------------------------------------------------------------------------------------------------------------------------------------------------------------------|
| UCSF Medical Center       | Principal Investigator | Wade SMITH                                                                                                                                                                                                                                                                                                                                                                                                                                                                                                                                                                                                                                                                                                                                                                                    |
|                           | Co-Investigator(s)     | Ahmad AHMAD, Aimee AYSENNE, John BETJEMANN, Molly BURNETT, Tamika BURRUS, Elizabeth CAHILL, Sheila CHAN, Judy CHANG, Natalie CHENG, Roger CHENG, Rene COLORADO, Amar DHAND, Vanja DOUGLAS, Julia DURRANT, Nancy EDWARDS, Christine FOX, Alan GELB, Trevor GREGATH, Cathra HALABI, Claude HEMPHILL, Karen HIRSCH, Andrew JOSEPHSON, Hooman KAMEL, Kevin KEENAN, Anthony KIM, Nerissa KO, Mohan KOTTAPALLY, Kathryn KVAM, Karl MEISEL, Asma MOHEET, Arturo MONTANO, Kazuma NAKAGAWA, Bharath NARAVETLA, Babak NAVI, Anh NGUYEN, Mai NGUYEN-HUYNH, Sharon POISSON, Prasanthi RAMANUJAM, Maulik SHAH, Nirav SHAH, Michel SHAMY, Kevin SHAPIRO, Peyman SHIRANI, Vineeta SINGH, Neel SINGHAL, Karl SPORER, Abraham THOMAS, Shahed TOOSSI, Christine WONG, Alan YEE, Debbie YI MADHOK, QingYang YUAN |
|                           | Study Coordinator(s)   | Jun LAUDER, Michele MEEKER, Dominica RANDAZZO, Kelley ROSBOROUGH                                                                                                                                                                                                                                                                                                                                                                                                                                                                                                                                                                                                                                                                                                                              |
| UF Health Jacksonville    | Principal Investigator | Scott SILLIMAN                                                                                                                                                                                                                                                                                                                                                                                                                                                                                                                                                                                                                                                                                                                                                                                |
|                           | Co-Investigator(s)     | Nader ANTONIOS, Ryan CROOKS, Marianne DE LIMA, Mary-Ann FARES, Imran FAROOQUI, Constance KATSAFANAS, Zeshaun KHAWAJA, Somphanh KHOUSAKOUN, Shannon LABOY, Sherif MAKAR, Robert MANNEL, Fatima MILFRED, Omar MOORE, Raid OSSI, Wally Jamie PLANTE, Fatoumata SAKHO, Adil ZIA                                                                                                                                                                                                                                                                                                                                                                                                                                                                                                                   |
|                           | Study Coordinator(s)   | Judy BULACAN, Rhonda CALHOUN, Jennifer ROBERTS, Mary STEGMAIER                                                                                                                                                                                                                                                                                                                                                                                                                                                                                                                                                                                                                                                                                                                                |
| UF Health Shands Hospital | Principal Investigator | Anna KHANNA                                                                                                                                                                                                                                                                                                                                                                                                                                                                                                                                                                                                                                                                                                                                                                                   |
|                           | Co-Investigator(s)     | Ganesh ASAITHAMBI, Julie BERTHY, Haitham DABABNEH, Scott DELLORSO, Waldo GUERRERO, Paul MACDONALD, Katharine MASKAS, Walter MORGAN, Nandakumar NAGARAJA, Arash NAZIRIPOUR, Swetha RENATI, Christian ROSADO, Vishnumurthy SHUSHRUTHA HEDNA, Michael SMITH, Arnaldo VELEZ, Michael WATERS, Melissa WEAVER, Christina WILSON, Jindong XU, Teddy YOUN                                                                                                                                                                                                                                                                                                                                                                                                                                             |

|                                |                         |                                                                                                                                                                                                                                                                                                                                                    |
|--------------------------------|-------------------------|----------------------------------------------------------------------------------------------------------------------------------------------------------------------------------------------------------------------------------------------------------------------------------------------------------------------------------------------------|
|                                | Study Coordinator(s)    | Rosie KIZZA, Teresa LYLES, Stacy MCCOMBS, Stacy MERRITT, David PARFITT, Sonisha WARREN                                                                                                                                                                                                                                                             |
| UMASS Memorial Medical Center  | Principal Investigator  | Majaz MOONIS                                                                                                                                                                                                                                                                                                                                       |
|                                | Co-Investigator(s)      | Ayman ALSALAIMEH, Raphael CARANDANG, Basad ESSA, Richard GODDEAU, Adalia JUN O'CONNELL, Muhib KHAN, Rajat KUMAR, Eugene LIN, Yunis MAYASI, Jennifer MEJILLA, Artin MINAEIAN, Jane MORRIS, Shashidhara NANJUNDASWAMY, Sanjeeva ONTEDDU, Rajiv PADMANABHAN, Anand PATEL, Josie PENAGOMEZ, Muhammad RAMZAN, Mary RUCHO, Ajay TUNGUTURI, Jiaying ZHANG |
|                                | Study Coordinator(s)    | Melissa ADAMS                                                                                                                                                                                                                                                                                                                                      |
| United Hospital                | Principal Investigator  | Sandra HANSON                                                                                                                                                                                                                                                                                                                                      |
|                                | Co-Investigator(s)      | Ganesh ASAITHAMBI, Michelle BIROS, Jesse CORRY, Mustapha EZZEDDINE, Dimitrios GIANNAKIDIS, Jane MONITA, Sheetal PATEL, Karen PORTH                                                                                                                                                                                                                 |
|                                | Study Coordinator(s)    | Bridget HO                                                                                                                                                                                                                                                                                                                                         |
| University of Alabama Hospital | Principal Investigator  | Andrei ALEXANDROV, Toby GROPEN, Gyanendra KUMAR                                                                                                                                                                                                                                                                                                    |
|                                | Co-Investigator(s)      | Karen ALBRIGHT, Asad CHAUDHARY, Michael LYERLY, Andrey SAMAL, Kara SANDS, Danny TKATCH                                                                                                                                                                                                                                                             |
|                                | Study Coordinator(s)    | Brandie CLINE, Melissa GAZI, Lynn MERRITT, April SISSON                                                                                                                                                                                                                                                                                            |
|                                | Principal Investigators | Rahul KARAMCHANDANI, Kyle WALSH                                                                                                                                                                                                                                                                                                                    |

|                                         |                         |                                                                                                                                                                                                                                                                                                                                                                                                                                                                                                                                                                                                                                                                                                                        |
|-----------------------------------------|-------------------------|------------------------------------------------------------------------------------------------------------------------------------------------------------------------------------------------------------------------------------------------------------------------------------------------------------------------------------------------------------------------------------------------------------------------------------------------------------------------------------------------------------------------------------------------------------------------------------------------------------------------------------------------------------------------------------------------------------------------|
| University of Cincinnati Medical Center | Co-Investigator(s)      | Opeolu ADEOYE, Samir BELAGAJE, Jordan BONOMO, Joseph BRODERICK, Rhonda CADENA, Elisheva COLEMAN, Felipe DE LOS RIOS LA ROSA, Stacie DEMEL, Bryan ECKERLE, Simona FERIOLI, Matthew FLAHERTY, Sabreena GALLOW, Rachel GARVIN, Anna GENSIC, Sabreena GILLOW, Aaron GROSSMAN, Jonah GROSSMAN, Laura HEITSCH, Adam JASNE, Daniel KANTER, Brian KATZ, Pooja KHATRI, Charles KIRCHER, Brett KISSELA, Dawn KLEINDORFER, William KNIGHT, Shannon KOHAKE, Natalie KREITZER, Julian MACEDO, Jason MACKEY, Sharyl MARTINI, Erin MCDONOUGH, Eva MISTRY, Meena MUNSHI, Brian OLOIZIA, Arthur PANCIOLI, Katrina PEARISO, Jonathan RATCLIFF, Sameer SHARMA, Blake SMITH, Michael STAR, Brian STETTLER, Daniel WOO, Muhammad ZAGHLOULEH |
|                                         | Study Coordinator(s)    | Shannon Iris DEEDS, Irene Ewing, Sara KEEGAN                                                                                                                                                                                                                                                                                                                                                                                                                                                                                                                                                                                                                                                                           |
| University of Colorado Hospital         | Principal Investigator  | Jennifer SIMPSON                                                                                                                                                                                                                                                                                                                                                                                                                                                                                                                                                                                                                                                                                                       |
|                                         | Co-Investigator(s)      | David CASE, Christy CASPER, Dana COUTTS, Alexander GRAVES, William JONES, Pearce KORB, Michelle LEPPERT, Robert NEUMANN, Daniel PASTULA, Sharon POISSON, Angel PULIDO, Daniel VELA DUARTE, Matthew WEST                                                                                                                                                                                                                                                                                                                                                                                                                                                                                                                |
|                                         | Study Coordinator(s)    | April BRYANT, Marissa HUDAK, Kaaren LINDSAY, Alexander STEIN, Ildiko TOROK                                                                                                                                                                                                                                                                                                                                                                                                                                                                                                                                                                                                                                             |
| University of Illinois Hospital         | Principal Investigators | Aslam KHAJA, Neelofer SHAFI, Fernando TESTAI                                                                                                                                                                                                                                                                                                                                                                                                                                                                                                                                                                                                                                                                           |
|                                         | Co-Investigator(s)      | Phil GORELICK, Rebecca GRYSIEWICZ, Laura PEDELTY, Fernando TESTAI                                                                                                                                                                                                                                                                                                                                                                                                                                                                                                                                                                                                                                                      |
|                                         | Study Coordinator(s)    | Maureen HILLMANN                                                                                                                                                                                                                                                                                                                                                                                                                                                                                                                                                                                                                                                                                                       |
| University of Iowa Hospitals & Clinics  | Principal Investigator  | Harold ADAMS                                                                                                                                                                                                                                                                                                                                                                                                                                                                                                                                                                                                                                                                                                           |
|                                         | Co-Investigator(s)      | Salman AL JERDI, Sami AL KASAB, Sudepta DANDAPAT, Patricia DAVIS, Michael FROEHLER, Waldo GUERRERO, Emily JAKSICH, Enrique LEIRA, Kaustubh LIMAYE, Jeffrey MILLER, Nandakumar NAGARAJA, Santiago ORTEGA-GUITERREZ, Connie PIEPER, Edgar SAMANIEGO, Ali SHEHARYAR, Allison VOSS                                                                                                                                                                                                                                                                                                                                                                                                                                         |
|                                         | Study Coordinator(s)    | Heena OLALDE, Jeri SIEREN                                                                                                                                                                                                                                                                                                                                                                                                                                                                                                                                                                                                                                                                                              |

|                                                          |                      |                                                                                                                                                                                                                                                                                                                                                                                                                                                                                                                                                                                                |
|----------------------------------------------------------|----------------------|------------------------------------------------------------------------------------------------------------------------------------------------------------------------------------------------------------------------------------------------------------------------------------------------------------------------------------------------------------------------------------------------------------------------------------------------------------------------------------------------------------------------------------------------------------------------------------------------|
| University of<br>Kansas<br>Hospital                      | Principal            | Michael ABRAHAM                                                                                                                                                                                                                                                                                                                                                                                                                                                                                                                                                                                |
|                                                          | Investigator         |                                                                                                                                                                                                                                                                                                                                                                                                                                                                                                                                                                                                |
|                                                          | Co-Investigator(s)   | Rawan ALBADAREEN, Bradley BARTH, Michelle BIROS, Chad CANNON, Colleen LECHTENBERG, Manoj MITTAL, Michael RIPPEE, Lee ROSTERMAN, Craig SHIPLEY, Jayashree SUNDARARAJAN, Yunxia WANG                                                                                                                                                                                                                                                                                                                                                                                                             |
|                                                          | Study Coordinator(s) | Alison BOYDSTON, Shannon GIFFORD                                                                                                                                                                                                                                                                                                                                                                                                                                                                                                                                                               |
| University of<br>Kentucky<br>Hospital                    | Principal            | Roger HUMPHRIES                                                                                                                                                                                                                                                                                                                                                                                                                                                                                                                                                                                |
|                                                          | Investigator         |                                                                                                                                                                                                                                                                                                                                                                                                                                                                                                                                                                                                |
|                                                          | Co-Investigator(s)   | CRAIG CARTER, Sameer DESAI, Creed PETTIGREW                                                                                                                                                                                                                                                                                                                                                                                                                                                                                                                                                    |
|                                                          | Study Coordinator(s) | Joann SHORT                                                                                                                                                                                                                                                                                                                                                                                                                                                                                                                                                                                    |
| University of<br>Louisville<br>Hospital                  | Principal            | Wei LIU, Anand VAISHNAV                                                                                                                                                                                                                                                                                                                                                                                                                                                                                                                                                                        |
|                                                          | Investigators        |                                                                                                                                                                                                                                                                                                                                                                                                                                                                                                                                                                                                |
|                                                          | Co-Investigator(s)   | Alex ABOU-CHEBL, Kerri REMMEL, Jignesh SHAH, Vincent TRUONG, Michael WILDER                                                                                                                                                                                                                                                                                                                                                                                                                                                                                                                    |
|                                                          | Study Coordinator(s) | Ann JERDE                                                                                                                                                                                                                                                                                                                                                                                                                                                                                                                                                                                      |
| University of<br>Maryland<br>Medical Center              | Principal            | Carolyn CRONIN                                                                                                                                                                                                                                                                                                                                                                                                                                                                                                                                                                                 |
|                                                          | Investigator         |                                                                                                                                                                                                                                                                                                                                                                                                                                                                                                                                                                                                |
|                                                          | Co-Investigator(s)   | Michael ABRAHAM, Ermias AYTENFISU, John COLE, Tarra DUTTA, Bolanle FAMAKIN, Lisa HERMANN, Peter HILL, Jon-Mark HIRSHON, Jennifer HOPP, Chandni KALARIA, Steven KITTNER, Jose MERINO, Melissa MOTTA, Michael PHIPPS, Anna ROSENBAUM, Jay SHAH, Kevin SHETH, Christopher STACK, Barney STERN, Marcella WOZNIAK                                                                                                                                                                                                                                                                                   |
|                                                          | Study Coordinator(s) | Virginia GANLEY                                                                                                                                                                                                                                                                                                                                                                                                                                                                                                                                                                                |
| University of<br>Minnesota<br>Medical Center<br>Hospital | Principal            | Mustapha EZZEDDINE                                                                                                                                                                                                                                                                                                                                                                                                                                                                                                                                                                             |
|                                                          | Investigator         |                                                                                                                                                                                                                                                                                                                                                                                                                                                                                                                                                                                                |
|                                                          | Co-Investigator(s)   | Mohammed ALKUWAITI, Shola ALUKO, David ANDERSON, Ganesh ASAITHAMBI, Kristen BARKLOW, Oladi BENTHO, Michelle BIROS, Laura FOSTER, Mikayel GRIGORYAN, Ameer HASSAN, Taka HIGASHIMORI, Haitham HUSSEIN, Vik JADHAV, Jessica JARNOT, Daraspreet KAINTH, Amir KHAN, Jae KIM, Saritha KUNDOOR, Shailesh MALE, Tapan MEHTA, Benjamin MILLER, Cathy O'BRIEN, Haejoe PARK, Rwoof RESHI, Gustavo RODRIGUEZ, Kalyan SAJJA, Divyajot SANDHU, Biggya SAPKOTA, Kenneth SHEA, Nathan SIT, Jamie STARKS, Christopher STREIB, Robert TAYLOR, Wondwossen TEKLE, Ruth THOMSON, Huseyin TORE, Haralabos ZACHARATOS |

|                                             |                         |                                                                                                                                                                                                                                                                           |
|---------------------------------------------|-------------------------|---------------------------------------------------------------------------------------------------------------------------------------------------------------------------------------------------------------------------------------------------------------------------|
|                                             | Study Coordinator(s)    | Audrey HENDRICKSON, Kathleen MILLER, Mindy RUMBOLZ, Julie SCHERBER, Abbey STAUGAITIS                                                                                                                                                                                      |
| University of New Mexico Hospital           | Principal Investigators | Christopher CALDER, Branko HUISA, Vishnumurthy SHUSHRUTHA HEDNA                                                                                                                                                                                                           |
|                                             | Co-Investigator(s)      | Kurt DENNINGHOFF, Marc MALKOFF, Matthew STARR                                                                                                                                                                                                                             |
|                                             | Study Coordinator(s)    | Jill PRESTOPNIK                                                                                                                                                                                                                                                           |
| University of North Carolina                | Principal Investigator  | Natalie AUCUTT-WALTER                                                                                                                                                                                                                                                     |
|                                             | Co-Investigator(s)      | Aaron ABATE, Anne BECKWITH, Octavio DE MARCHENA, David HUANG, Anahit MEHRABYAN, Leonardo MORANTES, Matthew OSTRANDER, Matthew SMITH, Michael WANG, Susan WILSON                                                                                                           |
|                                             | Study Coordinator(s)    | Sierra MARINO, Roxanne POOLE                                                                                                                                                                                                                                              |
| University of Toledo Medical Center         | Principal Investigator  | Mouhammad JUMAA                                                                                                                                                                                                                                                           |
|                                             | Co-Investigator(s)      | Gretchen TIETJEN, Syed ZAIDI                                                                                                                                                                                                                                              |
|                                             | Study Coordinator(s)    | Andrea KORSNACK                                                                                                                                                                                                                                                           |
| University of Washington Medical Center     | Principal Investigator  | David TIRSCHWELL                                                                                                                                                                                                                                                          |
|                                             | Co-Investigator(s)      | Claire CREUTZFELDT, Rizwan KALANI, Marlan KAY                                                                                                                                                                                                                             |
|                                             | Study Coordinator(s)    | Allison KUNZE, Wesley PLINKE, Glenn SCHUBERT, Patricia TANZI                                                                                                                                                                                                              |
| University of Wisconsin University Hospital | Principal Investigators | Jim SVENSON, Natalie WHEELER                                                                                                                                                                                                                                              |
|                                             | Co-Investigator(s)      | Eric ADELMAN, Azam AHMED, Tom AUFDERHEIDE, Edward-Luke BRADBURY, Marcus CHACON, Jamie ELLIOTT, Azita HAMEDANI, Matthew JENSEN, Krishna MYLAVARAPU, Justin SATTIN, Erick TARULA                                                                                            |
|                                             | Study Coordinator(s)    | Travis DORAN, Ashley HARRIS, Stephanie WILBRAND                                                                                                                                                                                                                           |
| UPMC Northwest                              | Principal Investigators | Vivek REDDY, Matthew STARR                                                                                                                                                                                                                                                |
|                                             | Co-Investigator(s)      | Amin AGHAEBRAHIM, Cliff CALLAWAY, David CAMPBELL, Cameron DEZFULIAN, Ankur DOSHI, Dan-Victor GIURGIUTIU, Deepak GULATI, Frank GUYETTE, Maxim HAMMER, Ashutosh JADHAV, Tudor JOVIN, James MCLAUGHLIN, Jon RITTENBERGER, Marcelo ROCHA, Christopher STREIB, Ruta TOTORAITIS |
|                                             | Study Coordinator(s)    | Sara DIFIORE, Mary KRUTH                                                                                                                                                                                                                                                  |

|                                                             |                                                  |                                                                                                                                                                                                                                                                                                                                                          |
|-------------------------------------------------------------|--------------------------------------------------|----------------------------------------------------------------------------------------------------------------------------------------------------------------------------------------------------------------------------------------------------------------------------------------------------------------------------------------------------------|
| UPMC<br>Presbyterian<br>Hospital                            | Principal<br>Investigators<br>Co-Investigator(s) | Vivek REDDY, Matthew STARR<br><br>Amin AGHAEBRAHIM, Cliff CALLAWAY, David CAMPBELL, Ankur DOSHI, Jonathan ELMER, Dan-Victor GIURGIUTIU, Deepak GULATI, Frank GUYETTE, Maxim HAMMER, Anat HOREV, Ashutosh JADHAV, Tudor JOVIN, Sunanda NANDURI, Srikant RANGARAJU, Jon RITTENBERGER, Marcelo ROCHA, Christopher STREIB, Ruta TOTORAITS, Lawrence WECHSLER |
|                                                             | Study Coordinator(s)                             | Sara DIFIORE, Mary KRUTH                                                                                                                                                                                                                                                                                                                                 |
| UPMC<br>Shadyside<br>Hospital                               | Principal<br>Investigators<br>Co-Investigator(s) | Vivek REDDY, Matthew STARR<br><br>Amin AGHAEBRAHIM, Cliff CALLAWAY, David CAMPBELL, Cameron DEZFULIAN, Ankur DOSHI, Jonathan ELMER, Dan-Victor GIURGIUTIU, Deepak GULATI, Frank GUYETTE, Maxim HAMMER, Ashutosh JADHAV, Tudor JOVIN, Srikant RANGARAJU, Jon RITTENBERGER, Marcelo ROCHA, Christopher STREIB, Ruta TOTORAITS                              |
|                                                             | Study Coordinator(s)                             | Sara DIFIORE, Mary KRUTH                                                                                                                                                                                                                                                                                                                                 |
| UT<br>Southwestern<br>Zale Lipshy<br>University<br>Hospital | Principal<br>Investigator<br>Co-Investigator(s)  | Mark JOHNSON<br><br>Mark ALBERTS, Chirantan BANERJEE, Mehari GEBREYOHANNAS, Paul HANSEN, Yathish HARALUR SREEKANTAIAH, Rashedul HASAN, Jessica LEE, Alejandro MAGADAN, Tami SALAHUDDIN, Ty SHANG, Fazeel SIDDIQUI                                                                                                                                        |
|                                                             | Study Coordinator(s)                             | Jan CAMERON-WATTS, Naomie GATHUA                                                                                                                                                                                                                                                                                                                         |
| UVA Medical<br>Center                                       | Principal<br>Investigator                        | Nina SOLENSKI                                                                                                                                                                                                                                                                                                                                            |

|                                           |                        |                                                                                                                                                                                                                                                                                                                                                                                                                                                                                                                                                                                                                                                                                                                                                                                                                                                                                                                                                                                                                                                                                                                  |
|-------------------------------------------|------------------------|------------------------------------------------------------------------------------------------------------------------------------------------------------------------------------------------------------------------------------------------------------------------------------------------------------------------------------------------------------------------------------------------------------------------------------------------------------------------------------------------------------------------------------------------------------------------------------------------------------------------------------------------------------------------------------------------------------------------------------------------------------------------------------------------------------------------------------------------------------------------------------------------------------------------------------------------------------------------------------------------------------------------------------------------------------------------------------------------------------------|
|                                           | Co-Investigator(s)     | Leah ACOSTA, James ADDINGTON, Jimmy BERTHAUD, Halley BRIGLIA, Michael BROGAN, Michelle BROWN, Joseph CARRERA, Micaela CHATMAN, Christina CHEE, Nicole CHIOTA-MCCOLLUM, Allison CROWELL, Jason CROWELL, Bryan CUPKA, Alex DALRYMPLE, Maria DIAZ-ORDONEZ, Stephen DONAHUE, Byran ECKERLE, Matthew EHRlich, Matthew ELLIOTT, Erin FOFF, Kaanchan GANGAL, Daryl GRESS, Christopher GROTH, Rahul GUHA, Amy GUZIK, Kelly GWATHMEY, Clark HALEY, Holly HENSLEY-JUDGE, Zsofia HOLE, Jasmin JO, Michelle JOHANSEN, Karen JOHNSTON, Sarah JONES, Kiran KANTH, Scott KOHLER, Noah KOLB, Greg KUHLMAN, David LAPIDES, Lauren MAHONEY, Shaneela MALIK, Sneha MANTRI, Matthew MCCONNELL, Mark MCDONALD, Prachi MEHNDIRATTA, Barnett NATHAN, Kathryn NEVEL, Whitney POLLOCK, Ryon POSTON, Surabhi RANJAN, Jeffrey RATLIFF, Chad SAUNDERS, Reza SEYEDSADJADI, Mohamed SHARABY, Sherita SMITH, Brian SORACE, Andrew SOUTHERLAND, Mohammad SUNBULLI, Joanna SUSKI, Lauren TALMAN, David TAPLINGER, Jennie TAYLOR, Liana THEROUX, Sarah TISEL, Lisa TORAN, Christopher VACHON, Hua WANG, Melanie WARD, Bradford WORRALL, Julie ZHOU |
|                                           | Study Coordinator(s)   | Theresa ALTHERR, Tracey BLOUNT, Amy FANSLER, Colleen HARMAN, Julia KRUPA, Claire McKinley                                                                                                                                                                                                                                                                                                                                                                                                                                                                                                                                                                                                                                                                                                                                                                                                                                                                                                                                                                                                                        |
| Valley Baptist Medical Center - Harlingen | Principal Investigator | Ameer HASSAN                                                                                                                                                                                                                                                                                                                                                                                                                                                                                                                                                                                                                                                                                                                                                                                                                                                                                                                                                                                                                                                                                                     |
|                                           | Co-Investigator(s)     | Elizabeth JONES, Julio OLMEDA, Victoria PARADA, Wondwossen TEKLE                                                                                                                                                                                                                                                                                                                                                                                                                                                                                                                                                                                                                                                                                                                                                                                                                                                                                                                                                                                                                                                 |
|                                           | Study Coordinator(s)   | Cacy CATE, Lisa JONES-FULLINGIM, Pamela NAUERth, Olive SANCHEZ                                                                                                                                                                                                                                                                                                                                                                                                                                                                                                                                                                                                                                                                                                                                                                                                                                                                                                                                                                                                                                                   |
| Vanderbilt University Hospital            | Principal Investigator | Howard KIRSHNER                                                                                                                                                                                                                                                                                                                                                                                                                                                                                                                                                                                                                                                                                                                                                                                                                                                                                                                                                                                                                                                                                                  |
|                                           | Co-Investigator(s)     | Mark BAKER, Brandi FRENCH, Ajay GUPTA, Rishi GUPTA, Lisa HERMANN, Shilpi MITTAL, Anne O'DUFFY, Derek RIEBAU, Eli ZIMMERMAN                                                                                                                                                                                                                                                                                                                                                                                                                                                                                                                                                                                                                                                                                                                                                                                                                                                                                                                                                                                       |
|                                           | Study Coordinator(s)   | Diane BROWN, Abbie HUDSON, Morgan PITTMAN, Dima SBENATY                                                                                                                                                                                                                                                                                                                                                                                                                                                                                                                                                                                                                                                                                                                                                                                                                                                                                                                                                                                                                                                          |



|                                    |                         |                                                                                                                                                                                                                                                                                                                                                                                 |
|------------------------------------|-------------------------|---------------------------------------------------------------------------------------------------------------------------------------------------------------------------------------------------------------------------------------------------------------------------------------------------------------------------------------------------------------------------------|
| VCU Medical Center                 | Principal Investigator  | Warren FELTON                                                                                                                                                                                                                                                                                                                                                                   |
|                                    | Co-Investigator(s)      | Joseph ORNATO                                                                                                                                                                                                                                                                                                                                                                   |
|                                    | Study Coordinator(s)    | Mary Beth DONNER, Jeneane HENRY                                                                                                                                                                                                                                                                                                                                                 |
| Wake Forest Baptist Medical Center | Principal Investigator  | Patrick REYNOLDS                                                                                                                                                                                                                                                                                                                                                                |
|                                    | Co-Investigator(s)      | Martinson ARNAN, Sanam BAGHSHOMALI, Edward-Luke BRADBURY, Cheryl BUSHNELL, Jeffrey CRAIG, Amy GUZIK, David LEFKOWITZ, Charles TEGELER                                                                                                                                                                                                                                           |
|                                    | Study Coordinator(s)    | Barbara ANDERSON, LaGina BARKER, Sandra NORONA                                                                                                                                                                                                                                                                                                                                  |
| Watauga Medical Center             | Principal Investigator  | Jeffrey CRITTENDEN                                                                                                                                                                                                                                                                                                                                                              |
|                                    | Co-Investigator(s)      | Burton KENNEDY                                                                                                                                                                                                                                                                                                                                                                  |
|                                    | Study Coordinator(s)    | Shannon STOUT                                                                                                                                                                                                                                                                                                                                                                   |
| WellSpan York Hospital             | Principal Investigator  | Erik KOCHERT                                                                                                                                                                                                                                                                                                                                                                    |
|                                    | Co-Investigator(s)      | Jill BAREN, Brent BECKER, Ronald BENENSON, Kalpesh BHUVA, Mark COLLIN, Brett CUCCHIARA, William FIELDS, Mark GONZALES, Jeremy HUTCHINS, Eric KLOTZ, Justin KOCH, David LEE, John MINGLE, Nicholas PAPPAS, Marc POLLACK, Kim POPE, Teri REBERT, Robert REIF, Nels ROSE, Eric SANDERS, Lisa SMALE, Matthew STEPHENS, Robert STERLING, Robert STUNTZ, Colleen TRAN, Guy YOUNGBLOOD |
|                                    | Study Coordinator(s)    | Barbie STAHLMAN                                                                                                                                                                                                                                                                                                                                                                 |
| William Beaumont Hospital          | Principal Investigator  | Robert SWOR                                                                                                                                                                                                                                                                                                                                                                     |
|                                    | Co-Investigator(s)      | Carol CLARK, Russell RAE, Vito ROCCO, Sunitha SANTHAKUMAR, Kelly SAWYER, Michelle TRACY-WIENER, Robert WELCH                                                                                                                                                                                                                                                                    |
|                                    | Study Coordinator(s)    | Heather GRACE, Brian WALKER                                                                                                                                                                                                                                                                                                                                                     |
| William Beaumont Hospital-Troy     | Principal Investigator  | Aveh BASTANI                                                                                                                                                                                                                                                                                                                                                                    |
|                                    | Co-Investigator(s)      | Matthew CHRISTENSEN, Aharon Gedaliah COOPER, Steven DIMSDALE, David DONALDSON, Michael OPSOMMER, Albert ROCCHINI, Robert SWOR, Brett TODD, Robert WELCH                                                                                                                                                                                                                         |
|                                    | Study Coordinator(s)    | Heonia HILLOCK, Pamela MARSACK                                                                                                                                                                                                                                                                                                                                                  |
|                                    | Principal Investigators | Sarah CHERIAN, Elzbieta WIRKOWSKI                                                                                                                                                                                                                                                                                                                                               |

|                                                |                                                   |                                                                                                                                                                                                                                             |
|------------------------------------------------|---------------------------------------------------|---------------------------------------------------------------------------------------------------------------------------------------------------------------------------------------------------------------------------------------------|
| Winthrop<br>University<br>Hospital             | Co-Investigator(s)<br>Study Coordinator(s)        | Karin ANTAKY, Feliks KOYFMAN, Kathleen MICHEL, Jay YASEN<br>Kim BYRNES                                                                                                                                                                      |
| WVU<br>Healthcare<br>Ruby Memorial<br>Hospital | Principal<br>Investigators<br>Co-Investigator(s)  | Amelia ADCOCK, John BRICK, Claudette BROOKS<br>Muhammad ALVI, Erica BLACKWELL, Todd CROCCO, Christopher CUMMINGS, Desiree GORDON, Laurie GUTMANN, Martha POWER, Adrienne SALOMON, Jay SHERMAN, Matthew S. SMITH, Tanya SMITH, Hannah YETZER |
| Yale-New<br>Haven Hospital                     | Principal<br>Investigator<br>Study Coordinator(s) | Joseph SCHINDLER<br>Zachary KING, Cora ORMSETH, Lynda RYALL, Sonya ZHOU                                                                                                                                                                     |
